# Supplementary material for: Hypoxic potentiation of cytoskeleton prevents oncogene-induced senescence
Source: Research Square preprint supplement (doi:10.21203/rs.3.rs-2137207/v1), 2022-11-30
Supplement: Supplementary file 2 [file 57d3a4ceb4b42da2afb88f88.docx]

**Figure S1.**

**
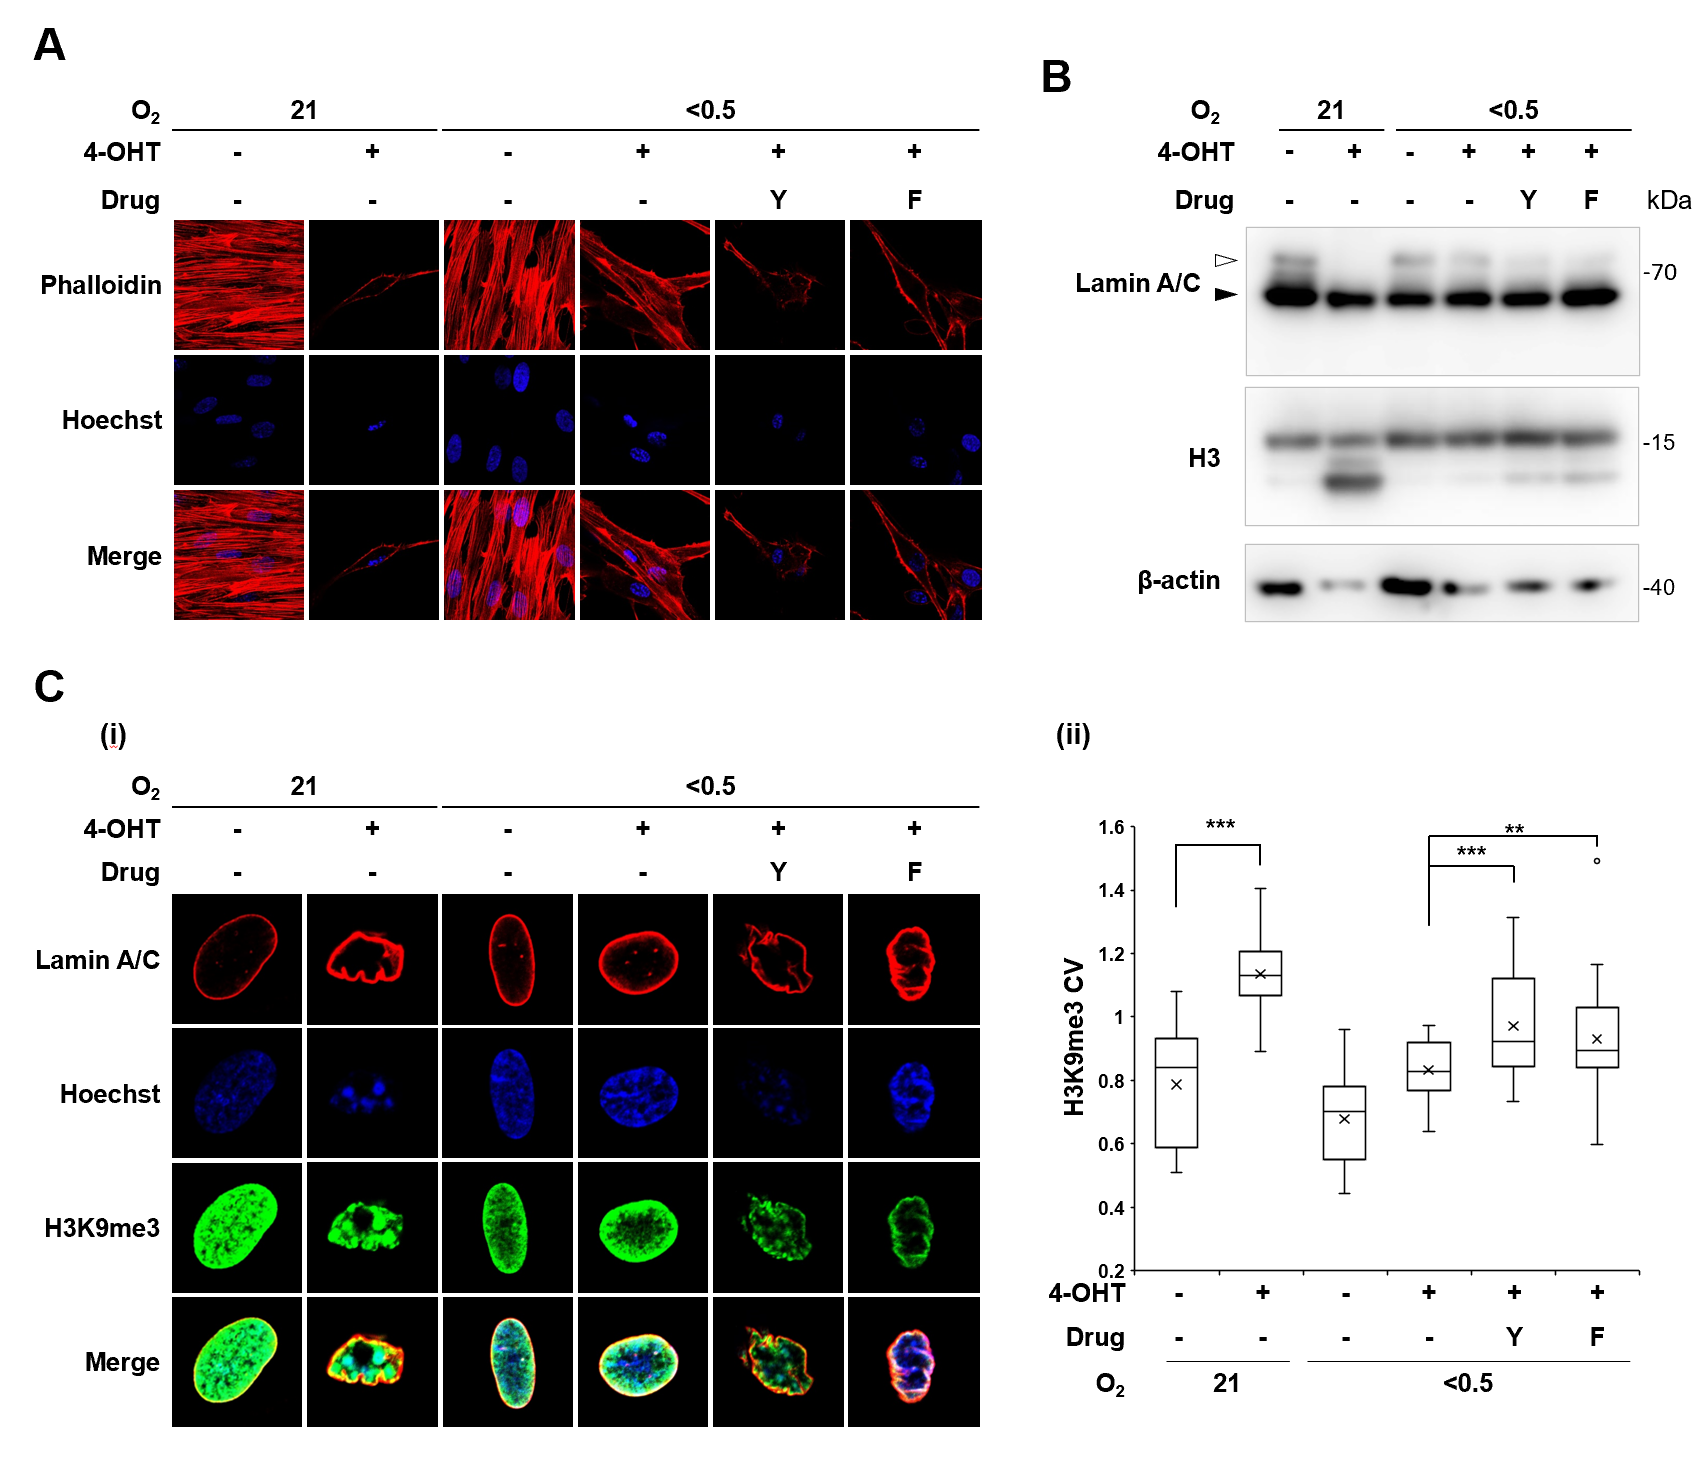
**

**Figure S1. Effects of Fasudil, a Rho-associated protein kinase** (**ROCK) inhibitor on nuclear integrity of hypoxic cells**

IMR90-ΔB-Raf:ER cells were treated with 4-hydroxy-tamoxifen (4-OHT; 100 nM) under normoxia (21% O2) or hypoxia (< 0.5% O2) for six days in the presence of inhibitors Y: Y27632 (ROCK1/2 inhibitor, 20 μM); F: Fasudil (ROCK1/2 inhibitor, 25 μM). (A) Confocal microscopic images of F-actin stress fibers stained with fluorescent-conjugated phalloidin and hoechst. (B) (i) Confocal microscopy images of cells stained with Lamin A/C, H3K9me3 antibodies, and Hoechst staining. Coefficient of variation (CV) of nuclear images stained with H3K9me3. The values on the y-axis represent the CV of nuclear images from two independent experiments (details in the Methods section). (C) Western blot analysis with the indicated antibodies. **p* < 0.05, ***p* < 0.01, and ****p* < 0.001 by Students’ t-test; ns, not significant

**Figure S2**


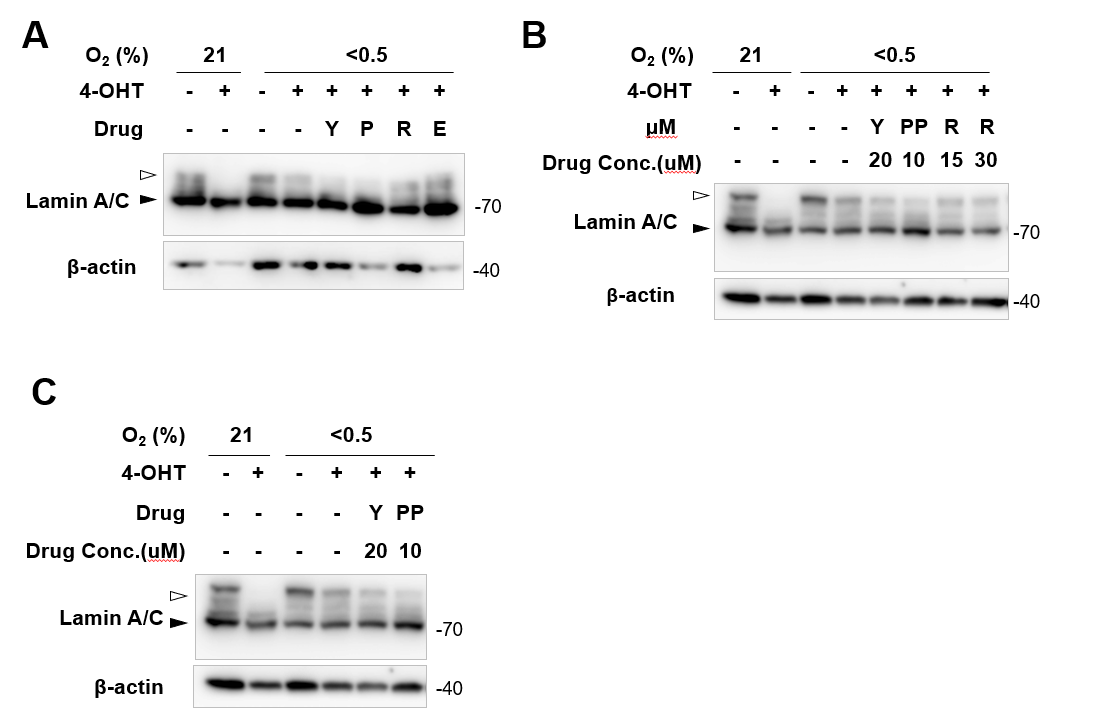


**Figure S2.** **Effects of cytoskeleton inhibitors on the stabilities of Lamin A/C proteins**

IMR90-ΔB-Raf:ER cells were treated with 4-hydroxy-tamoxifen (4-OHT; 100 nM) under normoxia (21% O2) or hypoxia (<0.5% O2) for 6 days in the presence of inhibitors, Y: Y27632 (ROCK1/2 inhibitor, 20 μM); P: PP2 (Src inhibitor, 10μM); R: Rhosin (Rho A inhibitor, 15, 30μM); E: EHT (Rac1/2/3 inibitor, 50μM). (A to C) Western blot analyses using Lamin A/C, Emerin, SUN1, CTSL, HIF1α, ER and β-actin antibodies. **p* < 0.05, ***p* < 0.01, and ****p* < 0.001 by Students’ t-test; ns, not significant.

**Supplementary Table S1. Primers for quantitative RT-PCR analyses**

| **Gene name** | **Direction** | **Sequence** |
| --- | --- | --- |
| 18S rRNA | Forward | 5’ - ACCGCAGCTAGGAATAATGGAATA - 3’ |
| Reverse | 5’ - CTTTCGCTCTGGTCCGTCTT - 3’ |
| LMNA | Forward | 5’- ATGAGGACCAGGTGGAGCAGTA - 3’ |
| Reverse | 5’- ACCAGGTTGCTGTTCCTCTCAG - 3’ |
| EMERIN | Forward | 5’- CCGCCTCCTCTTATAGCTTC - 3’ |
| Reverse | 5’- CTCTGGTAGAGTAAAGCGTCC - 3’ |
| SUN1 | Forward | 5’- CTGTGAGACAGTGGATGCCGTA - 3’ |
| Reverse | 5’- GCATCGTCTGCAAGTCGCCTTTG - 3’ |
| ITGA6 | Forward | 5’- ATGCACGCGGATCGAGTTTG - 3’ |
| Reverse | 5’- TTCCTGCTTCGTATTAACATGCTG - 3’ |
| FLNC | Forward | 5’- ATGGTAGCTGCACCGTGGAGTA - 3’ |
| Reverse | 5’- TCCACCACATCCTTCACTGGCA - 3’ |
| MYL9 | Forward | 5’- GGATGTGATTCGCAACGCCTTTG - 3’ |
| Reverse | 5’- CGGTACATCTCGTCCACTTCC - 3’ |
| SRC | Forward | 5’- CTGCTTTGGCGAGGTGTGGATG - 3’ |
| Reverse | 5’- CCACAGCATACAACTGCACCAG - 3’ |
| WASF1 | Forward | 5’- CTGCTTTGGCGAGGTGTGGATG - 3’ |
| Reverse | 5’- CCACAGCATACAACTGCACCAG - 3’ |
| ARHGAP10 | Forward | 5’- CTGCTCCGTTTGGTTCCAGTTG - 3’ |
| Reverse | 5’- GGAGTCAGTATGCCTCTTGGTAC - 3’ |
| ARHGAP18 | Forward | 5’- GCTGAAGCTCTTCATTCGGGAG - 3’ |
| Reverse | 5’- GGTTCAAAGCCTGTAGTTGCTGC - 3’ |
| ARHGEF25 | Forward | 5’- GCAAGAGCTACAACGGTGTCTG - 3’ |
| Reverse | 5’- GACACCACATGCTCTGACTTGG - 3’ |
| ACTG1 | Forward | 5’- CCGAGCCGTGTTTCCTTCC - 3’ |
| Reverse | 5’- GCCATGCTCAATGGGGTACT - 3’ |
| FN1 | Forward | 5’- ACAACACCGAGGTGACTGAGAC - 3’ |
| Reverse | 5’- GGACACAACGATGCTTCCTGAG - 3’ |
| MAPK3 | Forward | 5’- TGGCAAGCACTACCTGGATCAG - 3’ |
| Reverse | 5’- GCAGAGACTGTAGGTAGTTTCGG - 3’ |

**Supplementary Table S2.** **Antibodies used for immunofluorescence and western blot analyses.**

| **Antibody** | **Provider** | **Cat.No.** | **Application** |
| --- | --- | --- | --- |
| Anti-ERα | Santa Cruz Biotechnology | sc-543 | WB, IF |
| Anti-HIF-1α | BD bioscience | 610959 | WB |
| Anti-β-actin | Cell signaling | 3700 | WB |
| Anti-Cathepsin L | Abcam | ab6314 | WB |
| Anti-Lamin A/C | Cell signaling | 2032 | WB |
| Anti-Lamin A/C | Cell signaling | 4777 | IF |
| Anti-Lamin B | Abcam | ab8982 | WB |
| Anti-Emerin | Protetin tech | 10351-1-AP | WB |
| Anti-SUN1 | Abcam | ab124770 | WB |
| Anti-H3 | Abcam | ab1791 | WB |
| Anti-H3K9me3 | Abcam | ab8898 | WB, IF |
| Anti-γH2AX | Millipore | 05-636 | IF |
| Anti-MYPT1 Thr696 | Cell signaling | 5163 | WB |
| Anti-MYPT1 | Cell signaling | 8574 | WB |

**Supplementary Table S3. The lists of the DEGs included in the individual groups and clusters. (in a separated excel file)**

Ensembl IDs, Entrez IDs, symbols, descriptions, P-values, and log2-fold-changes of the DEGs are shown. P-values were computed as described in Materials and Methods section.
