# Supplementary material for: Hypoxic potentiation of cytoskeleton prevents oncogene-induced senescence
Source: Research Square preprint supplement (doi:10.21203/rs.3.rs-2137207/v1), 2022-11-30
Supplement: Supplementary file 3 [file a8f87222baa5eb0848faff67.docx]

**LeGENDS for Supplementary FIGURES**

**Figure S1. Effects of Fasudil, a Rho-associated protein kinase** (**ROCK) inhibitor on nuclear integrity of hypoxic cells**

IMR90-ΔB-Raf:ER cells were treated with 4-hydroxy-tamoxifen (4-OHT; 100 nM) under normoxia (21% O2) or hypoxia (< 0.5% O2) for six days in the presence of inhibitors Y: Y27632 (ROCK1/2 inhibitor, 20 μM); F: Fasudil (ROCK1/2 inhibitor, 25 μM). (A) Confocal microscopic images of F-actin stress fibers stained with fluorescent-conjugated phalloidin and hoechst. (B) (i) Confocal microscopy images of cells stained with Lamin A/C, H3K9me3 antibodies, and Hoechst staining. Coefficient of variation (CV) of nuclear images stained with H3K9me3. The values on the y-axis represent the CV of nuclear images from two independent experiments (details in the Methods section). (C) Western blot analysis with the indicated antibodies. **p* < 0.05, ***p* < 0.01, and ****p* < 0.001 by Students’ t-test; ns, not significant.

**Figure S2.** **Effects of cytoskeleton inhibitors on the stabilities of Lamin A/C proteins**

IMR90-ΔB-Raf:ER cells were treated with 4-hydroxy-tamoxifen (4-OHT; 100 nM) under normoxia (21% O2) or hypoxia (<0.5% O2) for 6 days in the presence of inhibitors, Y: Y27632 (ROCK1/2 inhibitor, 20 μM); P: PP2 (Src inhibitor, 10μM); R: Rhosin (Rho A inhibitor, 15, 30μM); E: EHT (Rac1/2/3 inibitor, 50μM). (A to C) Western blot analyses using Lamin A/C, Emerin, SUN1, CTSL, HIF1α, ER and β-actin antibodies. **p* < 0.05, ***p* < 0.01, and ****p* < 0.001 by Students’ t-test; ns, not significant.
