# Supplementary material for: Hypoxic potentiation of cytoskeleton prevents oncogene-induced senescence
Source: Research Square preprint supplement (doi:10.21203/rs.3.rs-2137207/v1), 2022-11-30
Supplement: Supplementary file 4 [file ec60bf7d0eeb936fb92006cf.xlsx]

## Sheet: Sheet1
Supplementary Table S3. The lists of the DEGs included in the individual groups and clusters.
Ensembl IDs, Entrez IDs, symbols, descriptions, P-values, and log2-fold-changes of the DEGs are shown. P-values were computed as described in Materials and Methods section.
				Fig3. A-B	Fig4. A-B	N+ / N-			H+ / H-			H+ / N+
Ensembl ID	Entrez ID	Symbol	Description	Group	Cluster	P-value	log2(fold-change)	up/down-DEG 1: up-regulated, -1: down-regulated, 0: un-changed	P-value	log2(fold-change)	up/down-DEG 1: up-regulated, -1: down-regulated, 0: un-changed	P-value	log2(fold-change)	up/down-DEG 1: up-regulated, -1: down-regulated, 0: un-changed
ENSG00000006459	80853	KDM7A	lysine demethylase 7A	1	1	0.00357216	2.15593	1	0.00213673	2.23097	1	0.0153417	0.947027	1
ENSG00000010438	5646	PRSS3	serine protease 3	1	1	0.00640014	3.3113	1	0.00318207	4.32684	1	0.00918737	1.91051	1
ENSG00000011347	9066	SYT7	synaptotagmin 7	1	1	0.00632763	1.64271	1	0.0043271	2.16715	1	0.00548836	2.15422	1
ENSG00000025772	10953	TOMM34	translocase of outer mitochondrial membrane 34	1	1	0.0124647	1.50865	1	0.00695342	2.25215	1	0.0246494	0.775669	1
ENSG00000026559	3755	KCNG1	potassium voltage-gated channel modifier subfamily G member 1	1	1	0.000645554	1.62017	1	0.00152488	1.61792	1	0.00253264	0.882317	1
ENSG00000038427	1462	VCAN	versican	1	1	0.0380789	1.94022	1	0.00895448	3.13553	1	0.010584	1.40827	1
ENSG00000041982	3371	TNC	tenascin C	1	1	0.0379554	1.17581	1	0.0042096	4.58434	1	0.011406	0.755734	1
ENSG00000049541	5982	RFC2	replication factor C subunit 2	1	1	0.000196189	0.723332	1	0.0373843	0.869886	1	0.0223407	0.927309	1
ENSG00000054282	10806	SDCCAG8	serologically defined colon cancer antigen 8	1	1	0.0305302	0.626926	1	0.0225512	1.1143	1	0.0228054	1.05961	1
ENSG00000054356	5798	PTPRN	protein tyrosine phosphatase receptor type N	1	1	0.0018091	3.69348	1	0.0070434	1.29594	1	0.0263416	0.661004	1
ENSG00000054967	84957	RELT	RELT TNF receptor	1	1	0.017533	1.23279	1	0.00413797	1.86639	1	0.000755293	0.783933	1
ENSG00000066056	7075	TIE1	tyrosine kinase with immunoglobulin like and EGF like domains 1	1	1	0.00648483	2.23319	1	4.37544e-05	2.66333	1	0.00504252	1.18741	1
ENSG00000069020	375449	MAST4	microtubule associated serine/threonine kinase family member 4	1	1	0.0197581	1.73632	1	0.00581457	2.30076	1	0.0224836	0.782048	1
ENSG00000072832	1400	CRMP1	collapsin response mediator protein 1	1	1	0.0204481	0.722529	1	0.00741408	1.66569	1	0.00492237	1.69168	1
ENSG00000074317	6620	SNCB	synuclein beta	1	1	0.0110695	1.64625	1	0.00971983	3.52397	1	0.00206704	3.90532	1
ENSG00000075213	10371	SEMA3A	semaphorin 3A	1	1	0.0192071	0.66457	1	0.000581687	2.8303	1	0.00987579	1.1756	1
ENSG00000077585	7107	GPR137B	G protein-coupled receptor 137B	1	1	0.0403435	1.32246	1	0.0122915	2.1677	1	0.0345032	1.4067	1
ENSG00000080573	50509	COL5A3	collagen type V alpha 3 chain	1	1	0.00289785	1.79336	1	0.00250353	2.68389	1	0.00785427	0.822966	1
ENSG00000082153	9689	BZW1	basic leucine zipper and W2 domains 1	1	1	0.0292154	0.661179	1	0.00205752	0.926453	1	0.0269792	0.71306	1
ENSG00000086991	50507	NOX4	NADPH oxidase 4	1	1	0.000476535	0.938794	1	0.0212816	0.798602	1	0.0141157	1.02139	1
ENSG00000087250	4504	MT3	metallothionein 3	1	1	0.0044446	0.711387	1	0.0165469	1.70778	1	0.000558398	3.95961	1
ENSG00000089327	53827	FXYD5	FXYD domain containing ion transport regulator 5	1	1	0.0248613	0.6424	1	0.0225235	1.37847	1	0.0175397	1.22837	1
ENSG00000091844	26575	RGS17	regulator of G protein signaling 17	1	1	0.00810074	2.30587	1	6.79252e-05	4.47731	1	0.0194515	1.14327	1
ENSG00000096433	3710	ITPR3	inositol 1,4,5-trisphosphate receptor type 3	1	1	0.00926129	0.821844	1	0.0214841	0.757426	1	0.0070801	1.20392	1
ENSG00000100003	23541	SEC14L2	SEC14 like lipid binding 2	1	1	0.0155363	1.1268	1	0.0033054	2.13666	1	0.039738	0.605793	1
ENSG00000100036	339665	SLC35E4	solute carrier family 35 member E4	1	1	0.00524259	1.88892	1	0.00279181	3.01771	1	0.0150743	0.712768	1
ENSG00000101955	8406	SRPX	sushi repeat containing protein X-linked	1	1	0.00977205	0.711926	1	0.00104975	1.97059	1	0.00264008	0.875672	1
ENSG00000104331	54928	BPNT2	inositol monophosphatase domain containing 1	1	1	0.0137031	0.962293	1	0.000343684	1.57984	1	0.0176219	0.772828	1
ENSG00000104783	3783	KCNN4	potassium calcium-activated channel subfamily N member 4	1	1	0.000741708	2.80843	1	0.00801747	3.58655	1	0.00436697	1.57571	1
ENSG00000105376	7087	ICAM5	intercellular adhesion molecule 5	1	1	0.00277594	1.07902	1	0.0101974	0.723441	1	0.00153934	1.16186	1
ENSG00000105875	29062	WDR91	WD repeat domain 91	1	1	0.0409762	0.946336	1	0.00673447	2.15373	1	0.0268456	0.671449	1
ENSG00000110427	25758	KIAA1549L	KIAA1549 like	1	1	0.050663	0.807256	1	0.0268506	1.31238	1	0.00602152	1.32533	1
ENSG00000110852	9976	CLEC2B	C-type lectin domain family 2 member B	1	1	0.00266249	1.05836	1	0.033087	0.923406	1	0.0019476	1.09125	1
ENSG00000111145	2004	ELK3	ETS transcription factor ELK3	1	1	0.0372814	0.613172	1	0.00534545	1.4602	1	0.0259709	0.888913	1
ENSG00000115170	90	ACVR1	activin A receptor type 1	1	1	0.0375048	0.609965	1	0.0138529	1.41451	1	0.033831	0.696873	1
ENSG00000117036	2117	ETV3	ETS variant transcription factor 3	1	1	0.00157639	0.838082	1	0.00334827	1.07843	1	0.00588409	0.720279	1
ENSG00000123374	1017	CDK2	cyclin dependent kinase 2	1	1	0.0239757	0.745441	1	0.00568825	1.84447	1	0.0142041	1.12417	1
ENSG00000125812	64412	GZF1	GDNF inducible zinc finger protein 1	1	1	0.0178536	0.582574	1	0.00608733	1.91347	1	0.00722389	0.741191	1
ENSG00000125871	92667	MGME1	mitochondrial genome maintenance exonuclease 1	1	1	0.0427029	0.813355	1	0.0227355	0.978518	1	0.01053	0.718339	1
ENSG00000127418	53834	FGFRL1	fibroblast growth factor receptor like 1	1	1	0.0379582	0.586263	1	0.0118679	1.05556	1	0.0316362	0.714645	1
ENSG00000128039	79644	SRD5A3	steroid 5 alpha-reductase 3	1	1	0.00282622	1.37538	1	0.00015314	1.09579	1	0.00110092	1.79035	1
ENSG00000128567	5420	PODXL	podocalyxin like	1	1	0.00592643	1.3535	1	0.00234192	3.39123	1	0.00518049	2.08445	1
ENSG00000130158	57572	DOCK6	dedicator of cytokinesis 6	1	1	0.00766884	0.872063	1	0.00251923	1.34472	1	0.00903017	0.745437	1
ENSG00000130204	10452	TOMM40	translocase of outer mitochondrial membrane 40	1	1	0.027311	0.70815	1	0.000692484	1.26972	1	0.025479	0.706948	1
ENSG00000131016	9590	AKAP12	A-kinase anchoring protein 12	1	1	0.00769778	1.85177	1	0.0101538	1.02166	1	0.0092006	0.856578	1
ENSG00000131697	261734	NPHP4	nephrocystin 4	1	1	0.0134899	0.745797	1	0.0133502	0.708413	1	0.023097	0.584503	1
ENSG00000132199	55556	ENOSF1	enolase superfamily member 1	1	1	0.0034042	0.80218	1	0.0113774	0.947608	1	0.00875282	0.7744	1
ENSG00000134531	2012	EMP1	epithelial membrane protein 1	1	1	0.0244889	0.651712	1	0.00649894	1.4145	1	0.00793419	1.52525	1
ENSG00000135074	8728	ADAM19	ADAM metallopeptidase domain 19	1	1	0.0106411	0.755379	1	0.00527558	2.87166	1	0.00375018	0.838423	1
ENSG00000135272	29969	MDFIC	MyoD family inhibitor domain containing	1	1	0.00433433	1.26043	1	0.00242625	2.37642	1	0.00552399	1.18388	1
ENSG00000135597	85021	REPS1	RALBP1 associated Eps domain containing 1	1	1	0.00890826	0.606962	1	0.00674929	1.49058	1	0.0263114	0.598106	1
ENSG00000136891	54881	TEX10	testis expressed 10	1	1	0.035741	0.70087	1	0.008244	1.08426	1	0.0125748	0.755668	1
ENSG00000137825	3706	ITPKA	inositol-trisphosphate 3-kinase A	1	1	0.00485515	2.65511	1	0.00441655	2.82757	1	0.00973518	1.52463	1
ENSG00000138639	83478	ARHGAP24	Rho GTPase activating protein 24	1	1	0.0153562	0.596344	1	0.00276182	2.57121	1	0.00604446	1.69686	1
ENSG00000138678	84803	GPAT3	glycerol-3-phosphate acyltransferase 3	1	1	0.00369195	3.23893	1	0.000301341	4.86908	1	0.0132816	0.644543	1
ENSG00000139722	79720	VPS37B	VPS37B subunit of ESCRT-I	1	1	0.000586627	0.699613	1	0.00439344	1.03768	1	0.00707022	0.650773	1
ENSG00000140450	91947	ARRDC4	arrestin domain containing 4	1	1	0.0263017	0.937047	1	0.0039536	1.76779	1	0.00284016	1.74425	1
ENSG00000140548	374655	ZNF710	zinc finger protein 710	1	1	0.0086452	1.14056	1	0.00214185	1.7366	1	0.00624083	0.884421	1
ENSG00000140598	79631	EFL1	elongation factor like GTPase 1	1	1	0.00791108	1.05329	1	0.0038151	1.50233	1	0.00593825	1.31998	1
ENSG00000141458	4864	NPC1	NPC intracellular cholesterol transporter 1	1	1	0.00986856	2.20432	1	0.000800812	2.52606	1	0.0105582	0.603585	1
ENSG00000143344	23179	RGL1	ral guanine nucleotide dissociation stimulator like 1	1	1	0.0100208	2.2149	1	0.00120907	3.14584	1	0.00182922	0.941938	1
ENSG00000143554	11000	SLC27A3	solute carrier family 27 member 3	1	1	0.0288172	0.937528	1	0.0157897	0.761449	1	0.0448689	0.651108	1
ENSG00000143756	23219	FBXO28	F-box protein 28	1	1	0.00400265	0.91185	1	0.00143155	1.12086	1	0.00492996	0.699697	1
ENSG00000145040	90226	UCN2	urocortin 2	1	1	0.00797777	2.74268	1	0.000816867	2.31042	1	0.0241893	1.06249	1
ENSG00000147394	7739	ZNF185	zinc finger protein 185 with LIM domain	1	1	0.0113897	1.28116	1	0.006262	0.696297	1	0.00458751	1.89465	1
ENSG00000147509	8601	RGS20	regulator of G protein signaling 20	1	1	0.00187826	0.847483	1	0.0030097	2.83937	1	0.00112562	1.82191	1
ENSG00000147854	115426	UHRF2	ubiquitin like with PHD and ring finger domains 2	1	1	0.0139827	0.811556	1	0.0329037	0.749955	1	0.00463356	0.600983	1
ENSG00000147889	1029	CDKN2A	cyclin dependent kinase inhibitor 2A	1	1	0.0111962	1.15623	1	0.00655963	2.16766	1	0.0174494	0.685005	1
ENSG00000151136	121551	BTBD11	BTB domain containing 11	1	1	0.000570395	2.87231	1	0.00219954	3.15094	1	0.000556987	1.41256	1
ENSG00000151474	55691	FRMD4A	FERM domain containing 4A	1	1	0.00246701	1.29391	1	0.000436309	1.62532	1	0.000664079	0.79483	1
ENSG00000152377	6695	SPOCK1	SPARC (osteonectin), cwcv and kazal like domains proteoglycan 1	1	1	0.00326606	2.07936	1	0.0100589	1.95997	1	0.00347318	0.796716	1
ENSG00000153976	9955	HS3ST3A1	heparan sulfate-glucosamine 3-sulfotransferase 3A1	1	1	0.0139742	1.65098	1	0.00135303	2.70487	1	0.0232354	0.968813	1
ENSG00000154146	4900	NRGN	neurogranin	1	1	0.0326643	1.72144	1	0.00611927	2.99423	1	0.0757071	0.702168	1
ENSG00000154217	26207	PITPNC1	phosphatidylinositol transfer protein cytoplasmic 1	1	1	0.00035374	3.28897	1	0.000529464	3.30666	1	0.00697865	0.86918	1
ENSG00000156103	4325	MMP16	matrix metallopeptidase 16	1	1	0.00375618	2.10426	1	0.00307304	2.35581	1	0.00944989	1.23092	1
ENSG00000157625	257397	TAB3	TGF-beta activated kinase 1 (MAP3K7) binding protein 3	1	1	0.0251948	0.953561	1	0.00549224	1.47803	1	0.0345522	0.744382	1
ENSG00000157985	116987	AGAP1	ArfGAP with GTPase domain, ankyrin repeat and PH domain 1	1	1	0.0364361	0.692266	1	0.00648941	0.595498	1	0.00297054	0.703018	1
ENSG00000159399	3099	HK2	hexokinase 2	1	1	0.0197103	1.02734	1	0.00927399	1.34591	1	0.0110468	1.11733	1
ENSG00000160972	84988	PPP1R16A	protein phosphatase 1 regulatory subunit 16A	1	1	0.0257915	1.12547	1	0.0136007	0.752022	1	0.00482922	0.828408	1
ENSG00000160999	10603	SH2B2	SH2B adaptor protein 2	1	1	0.0234058	0.751147	1	0.0408693	0.884111	1	0.0258114	0.640676	1
ENSG00000161638	3678	ITGA5	integrin subunit alpha 5	1	1	0.00547583	0.814175	1	0.0102389	1.12783	1	3.70501e-06	0.81181	1
ENSG00000161647	4356	MPP3	membrane palmitoylated protein 3	1	1	0.0509042	0.782493	1	0.0108403	1.28961	1	0.00678317	0.930778	1
ENSG00000161681	50944	SHANK1	SH3 and multiple ankyrin repeat domains 1	1	1	0.00986785	1.37867	1	0.000381616	2.98594	1	3.82851e-05	0.982974	1
ENSG00000162073	124222	PAQR4	progestin and adipoQ receptor family member 4	1	1	0.0101163	1.16292	1	0.023849	1.95397	1	0.0165198	0.781864	1
ENSG00000162415	57643	ZSWIM5	zinc finger SWIM-type containing 5	1	1	0.00113479	2.2324	1	0.000597742	1.14222	1	0.00601994	0.720297	1
ENSG00000163162	284996	RNF149	ring finger protein 149	1	1	0.0161614	0.846109	1	0.006762	1.31737	1	0.00492943	1.09886	1
ENSG00000164949	2669	GEM	GTP binding protein overexpressed in skeletal muscle	1	1	0.000669725	2.14774	1	0.000916549	2.8803	1	0.00429481	0.632428	1
ENSG00000165338	143279	HECTD2	HECT domain E3 ubiquitin protein ligase 2	1	1	0.00989203	1.03758	1	0.00671807	1.94297	1	0.00776023	1.30121	1
ENSG00000165475	51084	CRYL1	crystallin lambda 1	1	1	0.0168414	1.06079	1	0.00188091	2.9169	1	0.0122648	1.42948	1
ENSG00000166250	79827	CLMP	CXADR like membrane protein	1	1	0.00453881	0.720974	1	0.00103582	3.66429	1	0.0131872	0.75984	1
ENSG00000166825	290	ANPEP	alanyl aminopeptidase, membrane	1	1	0.00527241	1.5588	1	0.00098518	3.96676	1	0.00629358	1.64513	1
ENSG00000167772	51129	ANGPTL4	angiopoietin like 4	1	1	0.00482604	1.98363	1	0.00354517	2.14261	1	0.00406016	2.00917	1
ENSG00000167977	54442	KCTD5	potassium channel tetramerization domain containing 5	1	1	0.00424188	1.12028	1	0.000192661	1.92897	1	0.00403493	0.700117	1
ENSG00000168404	197259	MLKL	mixed lineage kinase domain like pseudokinase	1	1	0.0134555	1.57437	1	0.0011826	2.71769	1	0.0131517	0.963514	1
ENSG00000170545	57228	SMAGP	small cell adhesion glycoprotein	1	1	0.00180822	0.586617	1	0.0051018	2.05084	1	0.00398677	1.56649	1
ENSG00000171094	238	ALK	ALK receptor tyrosine kinase	1	1	0.00759545	1.73425	1	0.0032597	2.36336	1	0.00782481	1.90847	1
ENSG00000171488	84230	LRRC8C	leucine rich repeat containing 8 VRAC subunit C	1	1	0.00946577	1.18936	1	0.0106613	1.61207	1	0.0139423	1.06276	1
ENSG00000171889	554202	MIR31HG	MIR31 host gene	1	1	0.0178557	1.66708	1	0.00290455	1.90008	1	0.0365596	0.733025	1
ENSG00000172031	253152	EPHX4	epoxide hydrolase 4	1	1	0.0189926	1.08932	1	0.0147122	2.31884	1	0.00874594	0.849658	1
ENSG00000173530	8793	TNFRSF10D	TNF receptor superfamily member 10d	1	1	0.000168313	2.39321	1	0.00130205	3.52881	1	0.00075247	1.04043	1
ENSG00000173926	115123	MARCHF3	membrane associated ring-CH-type finger 3	1	1	0.00544248	0.78375	1	0.00390508	0.63257	1	0.00197618	1.59536	1
ENSG00000174021	2787	GNG5	G protein subunit gamma 5	1	1	0.0566383	0.790989	1	0.00311909	1.58332	1	0.0383747	0.875119	1
ENSG00000175352	56675	NRIP3	nuclear receptor interacting protein 3	1	1	0.00149259	2.24272	1	0.000358857	3.31647	1	0.00271348	1.78936	1
ENSG00000175806	4482	MSRA	methionine sulfoxide reductase A	1	1	0.0259502	0.673808	1	0.0143926	1.152	1	0.0365647	0.671756	1
ENSG00000176170	8877	SPHK1	sphingosine kinase 1	1	1	0.0151743	2.4753	1	0.00434033	2.9909	1	0.0365388	0.770627	1
ENSG00000177875	387856	CCDC184	coiled-coil domain containing 184	1	1	0.00162879	2.58032	1	0.0288213	0.871216	1	0.00891284	0.988934	1
ENSG00000179826	117195	MRGPRX3	MAS related GPR family member X3	1	1	0.0318454	1.51749	1	0.0071055	2.4386	1	0.0147825	2.8981	1
ENSG00000179859	284023	RNF227	ring finger protein 227	1	1	0.0526549	0.958259	1	0.0299718	0.663359	1	0.00532586	0.722703	1
ENSG00000182118	375061	FAM89A	family with sequence similarity 89 member A	1	1	0.00296842	2.27211	1	0.0047253	2.7985	1	0.0388915	0.626002	1
ENSG00000183696	7378	UPP1	uridine phosphorylase 1	1	1	0.000949188	3.70447	1	0.00272706	4.83915	1	0.00822971	1.37158	1
ENSG00000183828	256281	NUDT14	nudix hydrolase 14	1	1	0.0113601	0.642061	1	0.0213904	1.11933	1	0.0126235	0.586459	1
ENSG00000183840	2863	GPR39	G protein-coupled receptor 39	1	1	0.0161348	0.874228	1	0.014919	1.99229	1	0.0124384	1.20514	1
ENSG00000184226	5101	PCDH9	protocadherin 9	1	1	0.0229804	1.46365	1	0.000977417	3.82786	1	0.00267202	2.20898	1
ENSG00000187605	200424	TET3	tet methylcytosine dioxygenase 3	1	1	0.0301775	1.13053	1	0.00403987	1.87084	1	0.0347152	0.779618	1
ENSG00000188760	130612	TMEM198	transmembrane protein 198	1	1	0.0638372	0.626068	1	0.0352122	1.07292	1	0.0349767	0.736959	1
ENSG00000196358	84628	NTNG2	netrin G2	1	1	0.00632322	2.39187	1	0.00350459	3.26617	1	0.0162031	1.45708	1
ENSG00000197006	51108	METTL9	methyltransferase like 9	1	1	0.0145517	0.664697	1	0.00404393	1.77877	1	0.00433839	0.977087	1
ENSG00000197457	50861	STMN3	stathmin 3	1	1	0.00808504	0.909133	1	0.00465914	1.15924	1	0.013698	0.627106	1
ENSG00000198053	140885	SIRPA	signal regulatory protein alpha	1	1	0.0117833	1.15132	1	0.00460797	2.3107	1	0.0137008	1.17395	1
ENSG00000200033	106480578	RNU6-403P	RNA, U6 small nuclear 403, pseudogene	1	1	0.0149	4.49617	1	0.0309864	4.92127	1	0.0899169	1.22387	1
ENSG00000204767	100131897	INSYN2B	inhibitory synaptic factor family member 2B	1	1	0.00569672	1.65218	1	0.0205487	0.930268	1	0.0375296	0.615463	1
ENSG00000205078	100130958	SYCE1L	synaptonemal complex central element protein 1 like	1	1	0.0208056	0.806321	1	0.0172943	1.50253	1	0.0171209	1.27205	1
ENSG00000225193	100130495	RPS12P26	ribosomal protein S12 pseudogene 26	1	1	0.0418269	0.846122	1	0.0343899	1.92361	1	0.0392683	1.61369	1
ENSG00000229647	105373853	MYOSLID	myocardin-induced smooth muscle lncRNA, inducer of differentiation	1	1	0.0155759	1.54064	1	0.00995078	2.64389	1	0.00228176	2.1178	1
ENSG00000230844	401588	ZNF674-AS1	ZNF674 antisense RNA 1 (head to head)	1	1	0.0891851	0.607201	1	0.0320399	1.28858	1	0.010151	0.76138	1
ENSG00000232487	100874321	RASA3-IT1	RASA3 intronic transcript 1	1	1	0.0601383	0.828267	1	0.0972994	1.13042	1	0.0593008	0.650385	1
ENSG00000233608	117581	TWIST2	twist family bHLH transcription factor 2	1	1	0.00957375	0.825	1	0.00763215	1.64641	1	0.0278241	0.605754	1
ENSG00000234405	0	Z69733.1	novel transcript	1	1	0.0201937	1.43956	1	0.0171108	2.27331	1	0.0422662	1.04382	1
ENSG00000234614	100132111	C2CD4D-AS1	C2CD4D and THEM5 antisense RNA 1	1	1	0.0563089	1.30069	1	0.0271941	1.40066	1	0.0611556	0.716161	1
ENSG00000236453	0	AC003092.1	novel transcript	1	1	0.0157128	4.11479	1	0.00152064	5.23427	1	0.0135939	0.709651	1
ENSG00000237989	101928399	LINC01679	long intergenic non-protein coding RNA 1679	1	1	0.0134197	0.984527	1	0.027786	0.776155	1	0.0153391	0.934677	1
ENSG00000240476	100506377	LINC00973	long intergenic non-protein coding RNA 973	1	1	0.00708451	3.51557	1	0.013927	4.5816	1	0.000335039	0.725418	1
ENSG00000241081	326292	RPL22P2	ribosomal protein L22 pseudogene 2	1	1	0.0523664	0.646036	1	0.0179585	2.34361	1	0.0374335	1.37066	1
ENSG00000250064	0	AC097480.1	novel transcript	1	1	0.0864742	0.752246	1	0.00407481	1.26625	1	0.0310517	1.85693	1
ENSG00000250657	0	AC097451.1	novel transcript	1	1	0.0511526	1.94041	1	0.00490632	3.95564	1	0.0149301	1.41056	1
ENSG00000251003	102723356	ZFPM2-AS1	ZFPM2 antisense RNA 1	1	1	0.0245069	0.745583	1	0.00476606	2.4359	1	0.00655205	0.730692	1
ENSG00000251322	85358	SHANK3	SH3 and multiple ankyrin repeat domains 3	1	1	0.0116447	0.872609	1	0.00429534	1.89392	1	0.00419442	1.60003	1
ENSG00000253471	0	AC012574.1	novel transcript	1	1	0.000727946	2.15439	1	0.00754464	3.58013	1	0.0179367	1.05865	1
ENSG00000256087	9668	ZNF432	zinc finger protein 432	1	1	0.0399492	0.586405	1	0.00448694	1.25425	1	0.01319	0.970948	1
ENSG00000258976	0	AC013451.2	novel transcript	1	1	0.00912191	1.58347	1	0.0178709	2.96876	1	0.0169211	1.60104	1
ENSG00000259207	3690	ITGB3	integrin subunit beta 3	1	1	0.0185796	1.09427	1	0.0053181	2.00923	1	0.00841655	1.04428	1
ENSG00000260231	100134229	KDM7A-DT	KDM7A divergent transcript	1	1	0.00716937	1.65142	1	0.00218225	2.73441	1	0.00353405	2.02667	1
ENSG00000266709	84815	AC005224.3	novel transcript	1	1	0.0107334	1.21567	1	0.00755963	2.31837	1	0.0178453	0.687403	1
ENSG00000273143	0	AL355512.1	novel transcript	1	1	0.0370796	0.685568	1	0.00404305	1.48243	1	0.0186493	1.27286	1
ENSG00000287023	0	AC018978.1	#N/A	1	1	0.0159257	0.730301	1	0.0243137	2.13486	1	0.00719919	1.34154	1
ENSG00000001167	4800	NFYA	nuclear transcription factor Y subunit alpha	1	2	0.00485462	2.26891	1	0.00146366	1.92849	1	0.044431	-0.447371	0
ENSG00000004139	23098	SARM1	sterile alpha and TIR motif containing 1	1	2	0.0133758	0.605779	1	0.0124672	0.681183	1	0.0215536	0.456015	0
ENSG00000004700	5965	RECQL	RecQ like helicase	1	2	0.00634598	1.24809	1	0.00124259	1.74771	1	0.0465995	0.25133	0
ENSG00000004864	10165	SLC25A13	solute carrier family 25 member 13	1	2	0.00508522	1.16318	1	0.0157713	1.68093	1	0.576011	0.054287	0
ENSG00000005238	80256	FAM214B	family with sequence similarity 214 member B	1	2	0.00574453	1.55855	1	0.00192678	0.869666	1	0.0684372	-0.189605	0
ENSG00000005302	10943	MSL3	MSL complex subunit 3	1	2	0.0269194	0.822093	1	0.0112833	0.93731	1	0.0602027	0.209942	0
ENSG00000006015	55049	REX1BD	required for excision 1-B domain containing	1	2	0.0144629	0.877723	1	0.0181974	0.600295	1	0.0472329	-0.276342	0
ENSG00000006327	51330	TNFRSF12A	TNF receptor superfamily member 12A	1	2	0.0129578	1.05833	1	0.00118931	1.79587	1	0.0806748	-0.0910184	0
ENSG00000006468	2115	ETV1	ETS variant transcription factor 1	1	2	0.000210303	2.25159	1	0.00120078	3.0438	1	0.0216145	0.432266	0
ENSG00000007392	55692	LUC7L	LUC7 like	1	2	0.026945	1.18091	1	0.0327055	1.21055	1	0.0286039	-0.300157	0
ENSG00000009830	29954	POMT2	protein O-mannosyltransferase 2	1	2	0.0102117	1.13661	1	0.0135602	1.02512	1	0.0051325	-0.483128	0
ENSG00000010404	3423	IDS	iduronate 2-sulfatase	1	2	0.00797724	0.999852	1	0.0140801	0.870822	1	0.0501695	0.225083	0
ENSG00000011422	5329	PLAUR	plasminogen activator, urokinase receptor	1	2	0.000265879	2.5139	1	0.000568631	1.88232	1	0.00722036	0.437221	0
ENSG00000012061	2067	ERCC1	ERCC excision repair 1, endonuclease non-catalytic subunit	1	2	0.0030127	2.06976	1	0.00255857	2.148	1	0.127844	0.0950207	0
ENSG00000019144	23187	PHLDB1	pleckstrin homology like domain family B member 1	1	2	0.00146789	1.47544	1	0.00935268	1.94079	1	0.0219966	-0.443734	0
ENSG00000020129	23154	NCDN	neurochondrin	1	2	0.00436997	0.958231	1	0.012298	1.18299	1	0.029543	-0.29706	0
ENSG00000023287	9821	RB1CC1	RB1 inducible coiled-coil 1	1	2	0.0109769	1.11151	1	0.0113938	0.721901	1	0.0664218	-0.279045	0
ENSG00000023516	11215	AKAP11	A-kinase anchoring protein 11	1	2	0.034485	0.943484	1	0.0235939	0.659585	1	0.117333	-0.148818	0
ENSG00000031081	57514	ARHGAP31	Rho GTPase activating protein 31	1	2	0.0155162	1.14999	1	0.0204721	0.968181	1	0.0119933	-0.473058	0
ENSG00000033327	9846	GAB2	GRB2 associated binding protein 2	1	2	0.0253386	0.809327	1	0.0230039	0.638878	1	0.851579	-0.0101066	0
ENSG00000033627	535	ATP6V0A1	ATPase H+ transporting V0 subunit a1	1	2	0.00323571	0.789121	1	0.00771983	1.22872	1	0.0233761	-0.304488	0
ENSG00000033867	9497	SLC4A7	solute carrier family 4 member 7	1	2	0.0276297	0.750085	1	0.00617272	2.37496	1	0.0335371	0.480511	0
ENSG00000040531	1497	CTNS	cystinosin, lysosomal cystine transporter	1	2	0.00367096	1.21658	1	0.018633	1.49951	1	0.110563	-0.286182	0
ENSG00000047056	22884	WDR37	WD repeat domain 37	1	2	0.00566584	1.01097	1	0.00442555	1.16055	1	0.0570956	-0.190976	0
ENSG00000047634	6322	SCML1	Scm polycomb group protein like 1	1	2	0.024548	0.609406	1	0.00382357	0.679183	1	0.0288058	-0.534106	0
ENSG00000048162	51491	NOP16	NOP16 nucleolar protein	1	2	0.0367842	0.769381	1	0.0121632	1.05471	1	0.466631	-0.0522383	0
ENSG00000048405	168850	ZNF800	zinc finger protein 800	1	2	0.0201117	0.613009	1	0.0191	0.709157	1	0.0897715	-0.202846	0
ENSG00000049769	89801	PPP1R3F	protein phosphatase 1 regulatory subunit 3F	1	2	0.0155665	0.684688	1	0.0219255	0.628001	1	0.0930353	0.186747	0
ENSG00000051128	9454	HOMER3	homer scaffold protein 3	1	2	0.0115009	0.930255	1	0.00138832	1.6316	1	0.0275665	0.385784	0
ENSG00000051523	1535	CYBA	cytochrome b-245 alpha chain	1	2	0.00979852	0.915445	1	0.000535462	0.85398	1	0.00781669	-0.38037	0
ENSG00000057019	131566	DCBLD2	discoidin, CUB and LCCL domain containing 2	1	2	0.00163585	1.08095	1	0.00163285	1.79142	1	0.0352781	0.20449	0
ENSG00000057657	639	PRDM1	PR/SET domain 1	1	2	0.000230064	3.37962	1	0.00353458	2.33195	1	0.0225118	-0.206852	0
ENSG00000059728	4084	MXD1	MAX dimerization protein 1	1	2	0.00533627	1.37557	1	0.00628493	0.76783	1	0.0508597	-0.225796	0
ENSG00000059758	5128	CDK17	cyclin dependent kinase 17	1	2	0.0130542	1.58792	1	0.0024843	1.54015	1	0.759166	-0.0241242	0
ENSG00000059915	5662	PSD	pleckstrin and Sec7 domain containing	1	2	0.0170579	1.72941	1	0.00107728	1.87588	1	0.0441665	0.562436	0
ENSG00000060656	10076	PTPRU	protein tyrosine phosphatase receptor type U	1	2	0.00185462	3.30844	1	0.00496754	1.5434	1	0.483754	-0.0438097	0
ENSG00000062716	81671	VMP1	vacuole membrane protein 1	1	2	0.028235	0.882685	1	0.0240275	0.810032	1	0.166564	0.107074	0
ENSG00000063244	11338	U2AF2	U2 small nuclear RNA auxiliary factor 2	1	2	0.0253327	0.770554	1	0.0122032	0.693411	1	0.123542	-0.187792	0
ENSG00000066084	57609	DIP2B	disco interacting protein 2 homolog B	1	2	0.0531863	0.692229	1	0.0165429	1.23756	1	0.149785	0.0785149	0
ENSG00000066583	51015	ISOC1	isochorismatase domain containing 1	1	2	0.00340032	1.64438	1	0.00599982	3.13101	1	0.133356	-0.182056	0
ENSG00000067066	6672	SP100	SP100 nuclear antigen	1	2	0.0255863	1.00898	1	0.0285722	0.920646	1	0.0495637	0.56112	0
ENSG00000067177	5255	PHKA1	phosphorylase kinase regulatory subunit alpha 1	1	2	0.00206581	0.84557	1	0.00928193	1.28867	1	0.0223735	0.254059	0
ENSG00000067955	865	CBFB	core-binding factor subunit beta	1	2	0.0115371	1.45838	1	0.00194337	2.01426	1	0.0982717	-0.246419	0
ENSG00000068878	23198	PSME4	proteasome activator subunit 4	1	2	0.0160771	0.721663	1	0.0088615	1.77738	1	0.0391166	-0.21148	0
ENSG00000069493	29121	CLEC2D	C-type lectin domain family 2 member D	1	2	0.015069	1.81647	1	0.0251738	0.820468	1	0.122028	-0.300378	0
ENSG00000069956	5597	MAPK6	mitogen-activated protein kinase 6	1	2	0.00619725	0.975046	1	0.00242361	1.18977	1	0.121176	-0.102264	0
ENSG00000069974	5873	RAB27A	RAB27A, member RAS oncogene family	1	2	0.00643102	0.955585	1	0.0102685	0.861508	1	0.147041	0.0695584	0
ENSG00000070010	7353	UFD1	ubiquitin recognition factor in ER associated degradation 1	1	2	0.00461538	1.07417	1	0.0182715	1.00496	1	0.0326637	-0.406264	0
ENSG00000070961	490	ATP2B1	ATPase plasma membrane Ca2+ transporting 1	1	2	0.0091422	2.3212	1	0.00732534	0.867778	1	0.0800044	-0.408082	0
ENSG00000071054	9448	MAP4K4	mitogen-activated protein kinase kinase kinase kinase 4	1	2	0.00765579	0.951229	1	2.98165e-05	2.01327	1	0.00813338	0.557016	0
ENSG00000072041	55117	SLC6A15	solute carrier family 6 member 15	1	2	0.000589273	6.22806	1	0.000425018	5.56992	1	0.0364693	-0.404354	0
ENSG00000072042	51109	RDH11	retinol dehydrogenase 11	1	2	0.011942	0.619408	1	0.010681	1.10377	1	0.109413	-0.0820423	0
ENSG00000072401	7321	UBE2D1	ubiquitin conjugating enzyme E2 D1	1	2	0.0161602	1.18606	1	0.00583116	1.34396	1	0.0340663	-0.547909	0
ENSG00000072501	8243	SMC1A	structural maintenance of chromosomes 1A	1	2	0.0180746	0.882562	1	0.00788603	0.617999	1	0.0366494	-0.442331	0
ENSG00000073417	5151	PDE8A	phosphodiesterase 8A	1	2	0.0109982	0.647685	1	0.0117736	0.702722	1	0.0612496	-0.147614	0
ENSG00000075785	7879	RAB7A	RAB7A, member RAS oncogene family	1	2	0.0336505	0.841751	1	0.0360268	0.723439	1	0.130334	-0.316796	0
ENSG00000077463	51548	SIRT6	sirtuin 6	1	2	0.0267736	0.71856	1	0.029398	0.757628	1	0.171372	0.0305902	0
ENSG00000078177	55728	N4BP2	NEDD4 binding protein 2	1	2	0.00514767	0.732731	1	0.0145685	1.07341	1	0.0103013	0.515369	0
ENSG00000079313	57455	REXO1	RNA exonuclease 1 homolog	1	2	0.0391131	1.10335	1	0.0359839	0.973652	1	0.113092	-0.492018	0
ENSG00000080298	5991	RFX3	regulatory factor X3	1	2	0.0150637	1.56838	1	0.00106457	0.632003	1	0.0419854	-0.24427	0
ENSG00000082781	3693	ITGB5	integrin subunit beta 5	1	2	0.00196701	1.3299	1	0.00514132	0.936586	1	0.317744	0.0300385	0
ENSG00000083223	79670	TUT7	terminal uridylyl transferase 7	1	2	0.00519566	2.09155	1	0.00338585	2.71341	1	0.496964	0.0364705	0
ENSG00000083812	25799	ZNF324	zinc finger protein 324	1	2	0.0178597	0.799479	1	0.0236699	0.617103	1	0.197417	0.115047	0
ENSG00000084070	64744	SMAP2	small ArfGAP2	1	2	0.0191611	0.795757	1	0.00997159	0.976293	1	0.063133	0.277807	0
ENSG00000084093	5978	REST	RE1 silencing transcription factor	1	2	0.0368467	0.901384	1	0.00238656	0.995626	1	0.122069	0.230945	0
ENSG00000084234	334	APLP2	amyloid beta precursor like protein 2	1	2	0.000726006	1.41946	1	0.00131122	1.69707	1	0.0152763	-0.223459	0
ENSG00000087087	51593	SRRT	serrate, RNA effector molecule	1	2	0.0314134	0.652311	1	0.009506	0.747404	1	0.0924594	0.0648238	0
ENSG00000087152	56970	ATXN7L3	ataxin 7 like 3	1	2	0.0310309	0.682276	1	2.89344e-05	0.976681	1	0.0544959	-0.265799	0
ENSG00000087157	9489	PGS1	phosphatidylglycerophosphate synthase 1	1	2	0.00916814	0.611466	1	0.00317572	0.639196	1	0.000175723	-0.443196	0
ENSG00000087191	5705	PSMC5	proteasome 26S subunit, ATPase 5	1	2	0.00106104	0.760996	1	0.00917484	1.06656	1	0.0422248	-0.314978	0
ENSG00000087448	57542	KLHL42	kelch like family member 42	1	2	0.00582287	0.704412	1	0.000357092	1.38813	1	0.0107294	-0.486468	0
ENSG00000088247	8570	KHSRP	KH-type splicing regulatory protein	1	2	0.0208509	0.585513	1	0.0147422	0.608128	1	0.126743	-0.125236	0
ENSG00000088832	2280	FKBP1A	FKBP prolyl isomerase 1A	1	2	0.00220907	1.06672	1	0.0020247	1.55272	1	0.707947	0.00974627	0
ENSG00000089195	51605	TRMT6	tRNA methyltransferase 6	1	2	0.00443066	1.81811	1	0.00200441	2.12551	1	0.0144885	-0.457916	0
ENSG00000090020	6548	SLC9A1	solute carrier family 9 member A1	1	2	0.0517149	1.14573	1	0.0277661	1.1362	1	0.172911	0.411938	0
ENSG00000090339	3383	ICAM1	intercellular adhesion molecule 1	1	2	0.00184174	2.34794	1	4.55187e-05	3.00534	1	0.0479356	0.199857	0
ENSG00000091428	11069	RAPGEF4	Rap guanine nucleotide exchange factor 4	1	2	0.0250125	1.22306	1	0.00390861	0.971953	1	0.379002	0.103923	0
ENSG00000091490	23231	SEL1L3	SEL1L family member 3	1	2	0.00195078	2.16386	1	0.00276658	1.45969	1	0.0148987	-0.538173	0
ENSG00000092871	117584	RFFL	ring finger and FYVE like domain containing E3 ubiquitin protein ligase	1	2	0.0129622	0.701769	1	0.0135141	1.23359	1	0.85379	-0.00623426	0
ENSG00000095319	23511	NUP188	nucleoporin 188	1	2	0.00384457	1.33491	1	0.00869672	1.5276	1	0.015452	-0.493554	0
ENSG00000096060	2289	FKBP5	FKBP prolyl isomerase 5	1	2	0.00125935	0.922609	1	0.00500335	1.09244	1	0.00408574	-0.398996	0
ENSG00000096063	6732	SRPK1	SRSF protein kinase 1	1	2	0.000780346	1.21234	1	0.000395554	1.87176	1	0.0397625	-0.0955856	0
ENSG00000096070	27154	BRPF3	bromodomain and PHD finger containing 3	1	2	0.0412389	0.810154	1	0.0489504	0.789481	1	0.108016	-0.438386	0
ENSG00000099250	8829	NRP1	neuropilin 1	1	2	0.00374612	0.79575	1	0.00671595	1.63777	1	0.0247354	0.414878	0
ENSG00000099326	7593	MZF1	myeloid zinc finger 1	1	2	0.0143897	1.46907	1	0.0406023	0.591251	1	0.28264	-0.116599	0
ENSG00000099341	5714	PSMD8	proteasome 26S subunit, non-ATPase 8	1	2	0.0125189	0.676317	1	0.00607181	0.753054	1	0.326353	-0.0273406	0
ENSG00000099364	54620	FBXL19	F-box and leucine rich repeat protein 19	1	2	0.0243638	0.657452	1	0.0403869	0.58983	1	0.123763	-0.19395	0
ENSG00000099810	4507	MTAP	methylthioadenosine phosphorylase	1	2	0.0129958	1.01955	1	0.00746842	1.21986	1	0.271403	0.05032	0
ENSG00000099821	5442	POLRMT	RNA polymerase mitochondrial	1	2	0.0198012	1.1521	1	0.018909	1.08209	1	0.0333116	-0.505598	0
ENSG00000099822	610	HCN2	hyperpolarization activated cyclic nucleotide gated potassium and sodium channel 2	1	2	0.0288177	1.42559	1	0.0360139	0.788592	1	0.414089	-0.141726	0
ENSG00000099995	10291	SF3A1	splicing factor 3a subunit 1	1	2	0.00508451	0.641119	1	0.0157918	0.879657	1	0.276058	-0.0654761	0
ENSG00000099999	200312	RNF215	ring finger protein 215	1	2	0.0453454	0.687089	1	0.00276341	0.750151	1	0.152547	-0.102621	0
ENSG00000100083	26088	GGA1	golgi associated, gamma adaptin ear containing, ARF binding protein 1	1	2	0.0147507	0.780473	1	0.0123303	0.695684	1	0.042497	-0.258239	0
ENSG00000100092	23616	SH3BP1	SH3 domain binding protein 1	1	2	0.0255808	0.757489	1	0.056552	0.719381	1	0.0523033	-0.32035	0
ENSG00000100226	9567	GTPBP1	GTP binding protein 1	1	2	0.0103746	1.03755	1	0.0199046	1.2063	1	0.5537	0.0499221	0
ENSG00000100344	80339	PNPLA3	patatin like phospholipase domain containing 3	1	2	0.0066235	0.715626	1	0.0359208	1.20493	1	0.0477673	-0.295111	0
ENSG00000100379	79734	KCTD17	potassium channel tetramerization domain containing 17	1	2	0.0392309	1.01822	1	0.00630081	1.28902	1	0.254306	0.185453	0
ENSG00000100426	9889	ZBED4	zinc finger BED-type containing 4	1	2	0.0355009	0.610302	1	0.00897177	1.18805	1	0.441492	0.0413971	0
ENSG00000100441	23351	KHNYN	KH and NYN domain containing	1	2	0.0105663	1.66798	1	0.00831281	0.832921	1	0.0776214	-0.205427	0
ENSG00000100523	80821	DDHD1	DDHD domain containing 1	1	2	0.0468095	0.668322	1	0.00391496	0.894199	1	0.0387188	0.22628	0
ENSG00000100580	283578	TMED8	transmembrane p24 trafficking protein family member 8	1	2	0.0171831	1.18269	1	0.00152964	0.67354	1	0.0252784	-0.491787	0
ENSG00000100592	23002	DAAM1	dishevelled associated activator of morphogenesis 1	1	2	0.00587174	1.21084	1	0.00971595	0.895473	1	0.477905	-0.014468	0
ENSG00000100605	3705	ITPK1	inositol-tetrakisphosphate 1-kinase	1	2	0.00902576	0.931053	1	0.0053862	1.13919	1	0.521857	-0.03354	0
ENSG00000100650	6430	SRSF5	serine and arginine rich splicing factor 5	1	2	0.074711	0.679392	1	0.0646576	0.605875	1	0.1791	-0.0844729	0
ENSG00000100726	9894	TELO2	telomere maintenance 2	1	2	0.0402341	0.643271	1	0.0227253	0.815827	1	0.0580367	-0.467119	0
ENSG00000100994	5834	PYGB	glycogen phosphorylase B	1	2	0.000212421	0.998679	1	0.0133206	1.02847	1	0.17191	-0.0231878	0
ENSG00000101040	23613	ZMYND8	zinc finger MYND-type containing 8	1	2	0.00590702	1.83129	1	0.00559668	1.40853	1	0.0348492	0.373019	0
ENSG00000101246	10139	ARFRP1	ADP ribosylation factor related protein 1	1	2	0.0286074	1.07642	1	0.00305875	1.13188	1	0.009768	-0.273578	0
ENSG00000101294	81502	HM13	histocompatibility minor 13	1	2	0.0202294	0.970089	1	0.0122992	0.927384	1	0.0202091	-0.466124	0
ENSG00000101350	9371	KIF3B	kinesin family member 3B	1	2	0.00334368	0.987728	1	0.0133119	0.869786	1	0.0580438	-0.223373	0
ENSG00000101361	10528	NOP56	NOP56 ribonucleoprotein	1	2	0.0119345	0.646839	1	0.0131302	0.920581	1	0.0290302	-0.477556	0
ENSG00000101752	57534	MIB1	mindbomb E3 ubiquitin protein ligase 1	1	2	0.0462982	0.665808	1	0.0275999	0.639064	1	0.0737389	-0.234862	0
ENSG00000101966	331	XIAP	X-linked inhibitor of apoptosis	1	2	0.00601429	1.14549	1	0.0101032	1.10753	1	0.0410628	-0.364023	0
ENSG00000102178	8266	UBL4A	ubiquitin like 4A	1	2	0.00382851	0.645375	1	0.0212043	0.79601	1	0.105901	-0.177183	0
ENSG00000102265	7076	TIMP1	TIMP metallopeptidase inhibitor 1	1	2	0.000326041	2.12838	1	9.50953e-05	3.47143	1	0.296697	-7.02972e-05	0
ENSG00000102312	64840	PORCN	porcupine O-acyltransferase	1	2	0.00629199	2.0022	1	0.0101925	1.86697	1	0.026636	0.505791	0
ENSG00000102359	27286	SRPX2	sushi repeat containing protein X-linked 2	1	2	0.0305893	0.730203	1	0.00182163	0.950302	1	0.0224559	-0.332545	0
ENSG00000102385	1821	DRP2	dystrophin related protein 2	1	2	0.000117325	1.40368	1	0.00197212	1.13007	1	0.0126934	-0.193364	0
ENSG00000102390	51260	PBDC1	polysaccharide biosynthesis domain containing 1	1	2	0.00118013	0.751939	1	0.0173492	0.814387	1	0.0165889	-0.350758	0
ENSG00000102393	2717	GLA	galactosidase alpha	1	2	0.00851835	1.05111	1	0.00169813	1.07987	1	0.0179158	-0.384559	0
ENSG00000102409	56271	BEX4	brain expressed X-linked 4	1	2	0.0195903	0.887994	1	0.0142549	0.687941	1	0.0417444	0.322602	0
ENSG00000102471	54602	NDFIP2	Nedd4 family interacting protein 2	1	2	0.00295254	1.04322	1	0.0109841	0.776633	1	0.116136	-0.103991	0
ENSG00000102572	8428	STK24	serine/threonine kinase 24	1	2	0.00887597	1.32053	1	0.0206794	1.19287	1	0.383389	-0.1025	0
ENSG00000102699	143	PARP4	poly(ADP-ribose) polymerase family member 4	1	2	0.0123336	1.35323	1	0.00620766	1.06728	1	0.0179097	-0.327639	0
ENSG00000102755	2321	FLT1	fms related tyrosine kinase 1	1	2	0.00626147	2.04887	1	0.000734474	2.25723	1	0.14052	-0.0284426	0
ENSG00000103034	65009	NDRG4	NDRG family member 4	1	2	0.0146844	0.844591	1	0.00132216	1.68905	1	0.00609792	0.525582	0
ENSG00000103043	55697	VAC14	VAC14 component of PIKFYVE complex	1	2	0.00331669	1.30421	1	0.0230958	1.02515	1	0.0121598	-0.490257	0
ENSG00000103150	23417	MLYCD	malonyl-CoA decarboxylase	1	2	0.0273536	0.660318	1	0.0166284	0.596149	1	0.0856149	-0.136392	0
ENSG00000103152	4350	MPG	N-methylpurine DNA glycosylase	1	2	0.0232375	0.623156	1	0.00747001	1.37446	1	0.10426	0.213525	0
ENSG00000103274	4682	NUBP1	nucleotide binding protein 1	1	2	0.0114836	0.825478	1	0.0320792	0.799245	1	0.0673365	0.378666	0
ENSG00000103326	6650	CAPN15	calpain 15	1	2	0.00148394	1.35465	1	0.0145372	1.4149	1	0.0290605	-0.203363	0
ENSG00000103489	64131	XYLT1	xylosyltransferase 1	1	2	0.0311242	1.00772	1	0.0182128	1.38167	1	0.413725	0.105107	0
ENSG00000103496	6810	STX4	syntaxin 4	1	2	0.0163603	0.696826	1	0.0160932	0.586294	1	0.987699	0.000361609	0
ENSG00000103647	10391	CORO2B	coronin 2B	1	2	0.00125194	3.2333	1	0.000615561	3.44389	1	0.60718	0.0214474	0
ENSG00000103855	80381	CD276	CD276 molecule	1	2	0.0129247	0.997041	1	0.0229674	1.17333	1	0.264109	-0.137039	0
ENSG00000104312	8767	RIPK2	receptor interacting serine/threonine kinase 2	1	2	0.00926253	1.10336	1	0.00357851	1.94751	1	0.0988156	0.168818	0
ENSG00000104320	4683	NBN	nibrin	1	2	0.0182892	0.693307	1	0.00389079	0.975648	1	0.0185039	-0.271727	0
ENSG00000104689	8797	TNFRSF10A	TNF receptor superfamily member 10a	1	2	0.00351129	2.04774	1	0.00216179	1.73799	1	0.992352	0.000143143	0
ENSG00000104852	6625	SNRNP70	small nuclear ribonucleoprotein U1 subunit 70	1	2	0.0399497	1.19801	1	0.0168213	1.02211	1	0.0562384	-0.375267	0
ENSG00000104885	84444	DOT1L	DOT1 like histone lysine methyltransferase	1	2	0.000763761	1.54085	1	0.0109056	1.29823	1	0.116167	0.166017	0
ENSG00000104907	55621	TRMT1	tRNA methyltransferase 1	1	2	0.038132	0.980526	1	0.0112509	1.05892	1	0.105658	0.330655	0
ENSG00000105063	22870	PPP6R1	protein phosphatase 6 regulatory subunit 1	1	2	0.0182675	0.957002	1	0.00535074	1.20208	1	0.0429603	-0.291787	0
ENSG00000105443	9266	CYTH2	cytohesin 2	1	2	0.0125136	1.46464	1	0.0106528	1.17023	1	0.049605	0.109325	0
ENSG00000105472	6320	CLEC11A	C-type lectin domain containing 11A	1	2	0.0213509	1.35868	1	0.00363779	1.50226	1	0.102547	0.245022	0
ENSG00000105605	59284	CACNG7	calcium voltage-gated channel auxiliary subunit gamma 7	1	2	0.00519495	1.45995	1	0.0171147	1.51006	1	0.124335	-0.262854	0
ENSG00000105619	29844	TFPT	TCF3 fusion partner	1	2	0.0542324	0.885686	1	0.0221905	0.806761	1	0.130959	-0.231938	0
ENSG00000105656	8178	ELL	elongation factor for RNA polymerase II	1	2	0.00724894	1.6543	1	0.0300826	0.664042	1	0.0599017	-0.358786	0
ENSG00000105723	2931	GSK3A	glycogen synthase kinase 3 alpha	1	2	0.0247345	1.11525	1	0.00229799	1.22118	1	0.066084	-0.433332	0
ENSG00000105825	7980	TFPI2	tissue factor pathway inhibitor 2	1	2	0.000652964	3.94801	1	0.00199559	7.17105	1	0.0974571	0.299552	0
ENSG00000106070	2887	GRB10	growth factor receptor bound protein 10	1	2	0.000625794	2.63997	1	0.00852929	1.5795	1	0.0127018	-0.232698	0
ENSG00000106077	83451	ABHD11	abhydrolase domain containing 11	1	2	0.00185039	0.995717	1	0.0140088	1.26738	1	0.0653375	0.353291	0
ENSG00000106089	6804	STX1A	syntaxin 1A	1	2	0.00562138	2.76402	1	0.0046302	3.23466	1	0.00839185	0.460532	0
ENSG00000107020	55848	PLGRKT	plasminogen receptor with a C-terminal lysine	1	2	0.00885586	0.847421	1	0.000592096	1.29473	1	0.0115365	-0.248055	0
ENSG00000107282	320	APBA1	amyloid beta precursor protein binding family A member 1	1	2	0.00894813	0.590752	1	0.00792943	1.21651	1	0.0283158	0.231221	0
ENSG00000107290	23064	SETX	senataxin	1	2	0.0853859	0.600065	1	0.0325062	0.843874	1	0.0546639	-0.425378	0
ENSG00000107362	51104	ABHD17B	abhydrolase domain containing 17B	1	2	0.00788197	0.80006	1	0.00368049	1.67419	1	0.0119243	0.557867	0
ENSG00000107443	54619	CCNJ	cyclin J	1	2	0.0160896	0.935912	1	0.00656087	1.67605	1	0.0319321	-0.247058	0
ENSG00000107669	11101	ATE1	arginyltransferase 1	1	2	0.00973924	1.24288	1	0.00934439	1.60421	1	0.0414952	-0.457547	0
ENSG00000107672	54780	NSMCE4A	NSE4 homolog A, SMC5-SMC6 complex component	1	2	0.0195058	0.682795	1	0.0148414	0.893736	1	0.0331011	-0.388573	0
ENSG00000107731	219699	UNC5B	unc-5 netrin receptor B	1	2	0.000641673	2.30791	1	0.0124098	0.788743	1	0.174003	-0.0861596	0
ENSG00000107872	79176	FBXL15	F-box and leucine rich repeat protein 15	1	2	0.039144	0.652292	1	0.0200898	0.581534	1	0.107809	-0.249544	0
ENSG00000108010	10539	GLRX3	glutaredoxin 3	1	2	0.0182279	0.716602	1	0.00363956	1.07966	1	0.793179	0.00943537	0
ENSG00000108312	7343	UBTF	upstream binding transcription factor	1	2	0.016852	0.637185	1	0.0118495	1.21397	1	0.00646754	-0.391903	0
ENSG00000108590	51003	MED31	mediator complex subunit 31	1	2	0.0812869	0.598971	1	0.0399822	0.592011	1	0.628776	0.020453	0
ENSG00000108592	117246	FTSJ3	FtsJ RNA 2'-O-methyltransferase 3	1	2	0.0427015	0.671285	1	0.00259809	0.689705	1	0.0200621	-0.486072	0
ENSG00000108651	55813	UTP6	UTP6 small subunit processome component	1	2	0.0262994	0.874645	1	0.00106634	1.07497	1	0.577909	0.0126074	0
ENSG00000108669	9267	CYTH1	cytohesin 1	1	2	0.00631951	0.961784	1	0.00713356	1.69782	1	0.061991	0.326844	0
ENSG00000108788	6945	MLX	MAX dimerization protein MLX	1	2	0.0170981	0.711562	1	0.0037777	1.08653	1	0.160754	0.0906955	0
ENSG00000109089	30850	CDR2L	cerebellar degeneration related protein 2 like	1	2	0.0167936	1.008	1	0.0023765	1.72546	1	0.0719337	0.179559	0
ENSG00000109472	1363	CPE	carboxypeptidase E	1	2	0.00303352	3.5776	1	0.0147526	2.006	1	0.0166988	-0.323865	0
ENSG00000109572	1182	CLCN3	chloride voltage-gated channel 3	1	2	0.00127505	1.5058	1	0.00180452	1.05257	1	0.00871083	-0.524451	0
ENSG00000109654	23321	TRIM2	tripartite motif containing 2	1	2	0.0213899	0.686554	1	0.00442855	1.40129	1	0.0305489	0.42399	0
ENSG00000109917	8882	ZPR1	ZPR1 zinc finger	1	2	0.0422798	0.581463	1	0.0306754	0.77737	1	0.0534834	0.304337	0
ENSG00000109971	3312	HSPA8	heat shock protein family A (Hsp70) member 8	1	2	0.000905787	0.715485	1	0.00411803	1.27031	1	0.00892325	-0.315786	0
ENSG00000110660	54733	SLC35F2	solute carrier family 35 member F2	1	2	0.0199652	0.851326	1	0.0108851	1.85192	1	0.0601244	0.458007	0
ENSG00000110888	65981	CAPRIN2	caprin family member 2	1	2	0.022129	1.20572	1	0.0140628	1.54909	1	0.0781392	0.17338	0
ENSG00000110925	81566	CSRNP2	cysteine and serine rich nuclear protein 2	1	2	0.00281122	1.25421	1	0.0126304	1.13771	1	0.0120439	-0.472204	0
ENSG00000111642	1108	CHD4	chromodomain helicase DNA binding protein 4	1	2	0.0124502	1.07617	1	0.00950194	1.01751	1	0.0102858	-0.41807	0
ENSG00000111647	23074	UHRF1BP1L	UHRF1 binding protein 1 like	1	2	0.0085434	0.926124	1	0.00742272	0.940917	1	0.683775	0.0174974	0
ENSG00000111860	387119	CEP85L	centrosomal protein 85 like	1	2	0.012696	0.629905	1	0.00385127	0.886679	1	0.0177062	0.354927	0
ENSG00000112139	266727	MDGA1	MAM domain containing glycosylphosphatidylinositol anchor 1	1	2	0.00184704	2.82459	1	0.00260356	2.27878	1	0.730823	-0.00927974	0
ENSG00000112640	5528	PPP2R5D	protein phosphatase 2 regulatory subunit B'delta	1	2	0.012102	0.834777	1	0.0217024	0.720616	1	0.0306329	-0.434488	0
ENSG00000113300	57472	CNOT6	CCR4-NOT transcription complex subunit 6	1	2	0.0596166	0.884922	1	0.0370722	0.875685	1	0.901594	0.0171777	0
ENSG00000113319	5924	RASGRF2	Ras protein specific guanine nucleotide releasing factor 2	1	2	0.0291724	0.790566	1	0.000597212	1.62772	1	0.0206216	0.268714	0
ENSG00000113742	80315	CPEB4	cytoplasmic polyadenylation element binding protein 4	1	2	0.0232747	1.17865	1	0.0176533	0.624514	1	0.0623227	-0.410801	0
ENSG00000113758	1627	DBN1	drebrin 1	1	2	0.0188698	0.640168	1	0.00362068	0.966129	1	0.0242151	-0.365081	0
ENSG00000113966	84100	ARL6	ADP ribosylation factor like GTPase 6	1	2	0.00980593	0.738571	1	0.00697459	0.960523	1	0.0080891	0.414423	0
ENSG00000114270	1294	COL7A1	collagen type VII alpha 1 chain	1	2	0.00482869	2.73962	1	0.0102742	1.67761	1	0.118823	0.216626	0
ENSG00000114423	868	CBLB	Cbl proto-oncogene B	1	2	0.00686362	1.62535	1	0.0127341	0.963857	1	0.0211164	0.56497	0
ENSG00000114529	79669	C3orf52	chromosome 3 open reading frame 52	1	2	0.0211318	1.14137	1	0.00152682	1.20594	1	0.114842	-0.0703661	0
ENSG00000114738	7867	MAPKAPK3	MAPK activated protein kinase 3	1	2	0.0288705	0.897569	1	0.00468313	1.493	1	0.111182	0.188187	0
ENSG00000115020	200576	PIKFYVE	phosphoinositide kinase, FYVE-type zinc finger containing	1	2	0.0539086	0.675906	1	0.00801482	1.46841	1	0.0458465	0.367612	0
ENSG00000115107	55240	STEAP3	STEAP3 metalloreductase	1	2	0.000225476	1.8922	1	0.000858857	1.84196	1	0.0471823	-0.127565	0
ENSG00000115211	8890	EIF2B4	eukaryotic translation initiation factor 2B subunit delta	1	2	0.00579499	0.808954	1	0.0029409	0.698277	1	0.0114504	-0.507059	0
ENSG00000115216	29959	NRBP1	nuclear receptor binding protein 1	1	2	0.00139361	0.987845	1	0.00364661	1.13531	1	0.156176	0.0561426	0
ENSG00000115233	10213	PSMD14	proteasome 26S subunit, non-ATPase 14	1	2	0.0083488	0.600677	1	0.0149091	1.29022	1	0.133886	0.183404	0
ENSG00000115307	550	AUP1	AUP1 lipid droplet regulating VLDL assembly factor	1	2	0.0340692	0.801814	1	0.0240783	0.624376	1	0.055473	-0.420478	0
ENSG00000115539	79031	PDCL3	phosducin like 3	1	2	0.0493006	0.757493	1	0.0236727	1.19576	1	0.0775272	0.482305	0
ENSG00000115648	79083	MLPH	melanophilin	1	2	0.00473712	2.57198	1	0.00134739	2.48958	1	0.0189626	-0.267824	0
ENSG00000115652	80146	UXS1	UDP-glucuronate decarboxylase 1	1	2	0.00852876	1.106	1	0.000616267	1.12662	1	0.0211872	-0.524437	0
ENSG00000116679	10625	IVNS1ABP	influenza virus NS1A binding protein	1	2	0.00210709	1.95257	1	0.00382692	1.56284	1	0.0470353	-0.254793	0
ENSG00000116729	79971	WLS	Wnt ligand secretion mediator	1	2	0.00160868	2.4961	1	0.000112032	3.06106	1	0.100394	0.114559	0
ENSG00000116809	7709	ZBTB17	zinc finger and BTB domain containing 17	1	2	0.0212188	0.789696	1	0.00666231	0.886643	1	0.134539	0.124009	0
ENSG00000116977	3964	LGALS8	galectin 8	1	2	0.00514979	1.13226	1	0.00602823	1.29151	1	0.0118169	0.559399	0
ENSG00000117122	4237	MFAP2	microfibril associated protein 2	1	2	0.0206946	0.870112	1	0.071368	0.628815	1	0.103816	0.35259	0
ENSG00000117151	1486	CTBS	chitobiase	1	2	0.0125273	0.669163	1	0.0195552	0.82195	1	0.452725	0.0475862	0
ENSG00000117308	2582	GALE	UDP-galactose-4-epimerase	1	2	0.0148929	1.34445	1	0.00788003	1.34868	1	0.463481	0.0417864	0
ENSG00000117533	8674	VAMP4	vesicle associated membrane protein 4	1	2	0.0152775	0.586772	1	0.00708998	1.20777	1	0.0266295	0.311569	0
ENSG00000117748	6118	RPA2	replication protein A2	1	2	0.0277089	0.683611	1	0.00388303	1.0145	1	0.0403851	0.458509	0
ENSG00000119004	57404	CYP20A1	cytochrome P450 family 20 subfamily A member 1	1	2	0.00405275	0.766194	1	0.0420332	0.672999	1	0.102406	-0.262459	0
ENSG00000119321	23307	FKBP15	FKBP prolyl isomerase 15	1	2	0.00285762	0.85111	1	0.0375113	0.60542	1	0.0152082	0.219976	0
ENSG00000120129	1843	DUSP1	dual specificity phosphatase 1	1	2	0.000629499	1.71833	1	0.00174118	0.716957	1	0.0133717	-0.241116	0
ENSG00000120158	10171	RCL1	RNA terminal phosphate cyclase like 1	1	2	0.0254758	0.619667	1	0.0198668	0.754697	1	0.762783	-0.00904783	0
ENSG00000120314	54853	WDR55	WD repeat domain 55	1	2	0.0148594	0.682921	1	0.0092927	0.870708	1	0.0443278	0.286387	0
ENSG00000120458	79684	MSANTD2	Myb/SANT DNA binding domain containing 2	1	2	0.0205556	0.719755	1	0.0216508	0.875782	1	0.0379412	0.417938	0
ENSG00000120738	1958	EGR1	early growth response 1	1	2	0.0195681	2.2268	1	0.015835	3.64501	1	0.183706	-0.381819	0
ENSG00000120992	10434	LYPLA1	lysophospholipase 1	1	2	0.00593701	2.17046	1	0.00255628	2.60986	1	0.0279471	0.206379	0
ENSG00000121390	55269	PSPC1	paraspeckle component 1	1	2	0.000293754	0.696378	1	0.00688938	1.20639	1	0.0044409	-0.284199	0
ENSG00000121653	9479	MAPK8IP1	mitogen-activated protein kinase 8 interacting protein 1	1	2	0.00603864	1.49243	1	0.0116316	0.906237	1	0.0407814	-0.436901	0
ENSG00000121895	80008	TMEM156	transmembrane protein 156	1	2	0.000777699	2.93621	1	0.0121221	3.68852	1	0.0345986	0.368911	0
ENSG00000121966	7852	CXCR4	C-X-C motif chemokine receptor 4	1	2	0.000635145	7.04085	1	0.000383557	4.69169	1	0.759327	-0.0165068	0
ENSG00000121989	92	ACVR2A	activin A receptor type 2A	1	2	0.0135016	0.804544	1	0.00868366	0.611086	1	0.0768199	0.19212	0
ENSG00000122778	57670	KIAA1549	KIAA1549	1	2	0.0340559	0.788053	1	0.0318917	1.01781	1	0.0638287	-0.563986	0
ENSG00000122779	8805	TRIM24	tripartite motif containing 24	1	2	0.0086078	0.794789	1	0.0205136	0.605983	1	0.0256886	-0.392745	0
ENSG00000122877	1959	EGR2	early growth response 2	1	2	0.00269125	2.45471	1	0.000220007	1.7132	1	0.0190102	-0.231357	0
ENSG00000122965	9904	RBM19	RNA binding motif protein 19	1	2	0.010308	1.30541	1	0.0142193	1.37742	1	0.0219938	0.229985	0
ENSG00000123094	11228	RASSF8	Ras association domain family member 8	1	2	0.00770113	1.26016	1	0.0073578	1.45642	1	0.0424128	-0.340054	0
ENSG00000123395	60673	ATG101	autophagy related 101	1	2	0.0229345	0.84502	1	0.00957251	1.07441	1	0.0205432	-0.421236	0
ENSG00000123728	57826	RAP2C	RAP2C, member of RAS oncogene family	1	2	0.00685215	0.898598	1	0.00273271	1.14538	1	0.0210113	0.207622	0
ENSG00000123810	80776	B9D2	B9 domain containing 2	1	2	0.0116577	1.32213	1	0.0280136	1.05884	1	0.0371443	0.363825	0
ENSG00000123908	27161	AGO2	argonaute RISC catalytic component 2	1	2	0.0468419	1.4353	1	0.0156311	1.59289	1	0.11504	-0.228712	0
ENSG00000124098	116151	FAM210B	family with sequence similarity 210 member B	1	2	0.00155346	1.09342	1	0.00597354	2.06148	1	0.272007	0.0618312	0
ENSG00000124209	57403	RAB22A	RAB22A, member RAS oncogene family	1	2	0.028879	0.617546	1	0.000881087	1.01867	1	0.0382562	0.3209	0
ENSG00000124216	6615	SNAI1	snail family transcriptional repressor 1	1	2	0.0672849	0.661739	1	0.0646194	0.928318	1	0.111005	0.655689	0
ENSG00000124222	8675	STX16	syntaxin 16	1	2	0.0234137	0.718352	1	0.00630452	0.992164	1	0.83007	0.00426075	0
ENSG00000124444	79177	ZNF576	zinc finger protein 576	1	2	0.00701394	1.54367	1	0.00890561	0.938993	1	0.0322315	-0.494752	0
ENSG00000124766	6659	SOX4	SRY-box transcription factor 4	1	2	0.00898765	1.16736	1	0.000446013	3.60364	1	0.00577117	0.378761	0
ENSG00000125124	583	BBS2	Bardet-Biedl syndrome 2	1	2	0.023488	0.837194	1	0.0092904	0.938688	1	0.0355575	0.504458	0
ENSG00000125148	4502	MT2A	metallothionein 2A	1	2	0.00106581	1.24177	1	0.00581369	1.47714	1	9.35074e-06	0.291593	0
ENSG00000125398	6662	SOX9	SRY-box transcription factor 9	1	2	0.00283804	1.79495	1	0.0027897	2.71854	1	0.0820145	-0.23073	0
ENSG00000125430	9953	HS3ST3B1	heparan sulfate-glucosamine 3-sulfotransferase 3B1	1	2	0.01696	1.774	1	0.00324559	2.96517	1	0.00483416	0.450642	0
ENSG00000125454	60386	SLC25A19	solute carrier family 25 member 19	1	2	0.03728	0.77181	1	0.0174483	0.70079	1	0.0638366	-0.381162	0
ENSG00000125485	64794	DDX31	DEAD-box helicase 31	1	2	0.022232	0.729381	1	0.0219398	0.840493	1	0.188969	-0.0927881	0
ENSG00000125630	84172	POLR1B	RNA polymerase I subunit B	1	2	0.00712032	0.911712	1	0.00887862	0.650462	1	0.0131831	-0.535675	0
ENSG00000125657	8744	TNFSF9	TNF superfamily member 9	1	2	0.0045314	0.915457	1	0.0136122	1.29634	1	0.438628	-0.0291843	0
ENSG00000125835	6628	SNRPB	small nuclear ribonucleoprotein polypeptides B and B1	1	2	0.0167948	0.736818	1	0.0240688	0.843521	1	0.0154083	0.141939	0
ENSG00000125912	56926	NCLN	nicalin	1	2	0.0193707	0.687312	1	0.0100626	0.81591	1	0.0869397	0.135683	0
ENSG00000125967	63941	NECAB3	N-terminal EF-hand calcium binding protein 3	1	2	0.0104063	0.811915	1	0.0111321	1.18564	1	0.0283772	-0.38084	0
ENSG00000125968	3397	ID1	inhibitor of DNA binding 1, HLH protein	1	2	0.00499259	2.84931	1	0.0110094	0.688151	1	0.0217325	-0.400014	0
ENSG00000126012	8242	KDM5C	lysine demethylase 5C	1	2	0.00420395	1.59243	1	0.0101147	1.15033	1	0.0972389	-0.168744	0
ENSG00000126453	83596	BCL2L12	BCL2 like 12	1	2	0.049835	0.954124	1	0.0440032	0.633619	1	0.0671436	-0.509466	0
ENSG00000126464	57479	PRR12	proline rich 12	1	2	0.0763892	0.599384	1	0.00950371	0.684042	1	0.100832	-0.325798	0
ENSG00000126749	10436	EMG1	EMG1 N1-specific pseudouridine methyltransferase	1	2	0.00496683	0.732446	1	0.0237433	0.644647	1	0.392044	0.0451673	0
ENSG00000126767	2002	ELK1	ETS transcription factor ELK1	1	2	0.00541884	1.00314	1	0.0052163	0.993125	1	0.0443202	-0.25061	0
ENSG00000127616	6597	SMARCA4	SWI/SNF related, matrix associated, actin dependent regulator of chromatin, subfamily a, member 4	1	2	0.0219947	0.649904	1	0.0224868	1.29979	1	0.260906	-0.152644	0
ENSG00000127947	5782	PTPN12	protein tyrosine phosphatase non-receptor type 12	1	2	0.021476	1.61404	1	0.00751623	1.6869	1	0.179451	0.236076	0
ENSG00000128512	9732	DOCK4	dedicator of cytokinesis 4	1	2	0.0138469	1.9629	1	0.0029102	2.90523	1	0.599342	0.0498937	0
ENSG00000128805	58504	ARHGAP22	Rho GTPase activating protein 22	1	2	0.000116796	1.81615	1	0.00479658	1.33143	1	0.020093	0.45832	0
ENSG00000129255	9526	MPDU1	mannose-P-dolichol utilization defect 1	1	2	0.0228015	0.775586	1	0.0423583	0.816687	1	0.0215609	-0.539042	0
ENSG00000129911	83855	KLF16	Kruppel like factor 16	1	2	0.060415	0.76781	1	0.00599471	1.23621	1	0.780864	-0.0321631	0
ENSG00000130254	9667	SAFB2	scaffold attachment factor B2	1	2	0.0212567	0.833823	1	0.00666673	0.679623	1	0.0447219	-0.17694	0
ENSG00000130340	51429	SNX9	sorting nexin 9	1	2	0.00218825	1.99395	1	0.00544442	1.58401	1	0.00176323	-0.437778	0
ENSG00000130396	4301	AFDN	afadin, adherens junction formation factor	1	2	0.00730628	1.05816	1	0.0199799	0.717965	1	0.336165	0.0571836	0
ENSG00000130479	55201	MAP1S	microtubule associated protein 1S	1	2	0.0164675	1.47313	1	0.0128652	1.36516	1	0.347618	-0.122944	0
ENSG00000130706	11047	ADRM1	adhesion regulating molecule 1	1	2	0.0127223	0.96037	1	0.00684227	1.13961	1	0.950427	-0.0013226	0
ENSG00000130734	84971	ATG4D	autophagy related 4D cysteine peptidase	1	2	0.0876533	0.663986	1	0.0170236	0.774369	1	0.707934	-0.0447157	0
ENSG00000131323	7187	TRAF3	TNF receptor associated factor 3	1	2	0.00279111	0.774745	1	0.0156212	0.888236	1	0.00289044	-0.568496	0
ENSG00000131398	3748	KCNC3	potassium voltage-gated channel subfamily C member 3	1	2	0.00698518	1.59139	1	0.0422364	0.744094	1	0.115448	0.268499	0
ENSG00000131459	9945	GFPT2	glutamine-fructose-6-phosphate transaminase 2	1	2	0.000567572	4.97157	1	0.000126676	4.23832	1	0.00509368	-0.25312	0
ENSG00000131504	1729	DIAPH1	diaphanous related formin 1	1	2	0.0118869	0.757461	1	0.0213862	0.634286	1	0.0079326	-0.301362	0
ENSG00000131591	54991	C1orf159	chromosome 1 open reading frame 159	1	2	0.0208495	0.781039	1	0.0116041	0.839632	1	0.544139	-0.0233622	0
ENSG00000132004	84261	FBXW9	F-box and WD repeat domain containing 9	1	2	0.0437382	0.907263	1	0.0224935	0.651551	1	0.636502	0.0416989	0
ENSG00000132286	26515	TIMM10B	translocase of inner mitochondrial membrane 10B	1	2	0.0301016	0.668313	1	0.0135722	1.05036	1	0.869914	0.00919271	0
ENSG00000132359	23108	RAP1GAP2	RAP1 GTPase activating protein 2	1	2	0.00394354	1.52829	1	0.00780293	1.54437	1	0.0296953	-0.299177	0
ENSG00000132361	23277	CLUH	clustered mitochondria homolog	1	2	0.0265367	0.935177	1	0.0181053	1.04697	1	0.0905372	-0.346135	0
ENSG00000132382	10514	MYBBP1A	MYB binding protein 1a	1	2	0.0150748	0.844976	1	0.0223417	1.11791	1	0.0432258	-0.43488	0
ENSG00000132467	57050	UTP3	UTP3 small subunit processome component	1	2	0.0371853	0.719146	1	0.00771454	0.952259	1	0.054046	-0.371718	0
ENSG00000132581	6388	SDF2	stromal cell derived factor 2	1	2	0.00161327	0.584596	1	0.0326106	0.652515	1	0.478568	-0.0551411	0
ENSG00000132603	51388	NIP7	nucleolar pre-rRNA processing protein NIP7	1	2	0.0544351	0.607558	1	0.0120637	1.12076	1	0.0464594	-0.308497	0
ENSG00000132661	29107	NXT1	nuclear transport factor 2 like export factor 1	1	2	0.0148843	1.08055	1	0.00211168	1.53428	1	0.0740067	0.190023	0
ENSG00000132688	10763	NES	nestin	1	2	0.00572301	1.24981	1	0.00100335	1.93664	1	0.0474513	-0.124279	0
ENSG00000132716	50717	DCAF8	DDB1 and CUL4 associated factor 8	1	2	0.00225053	0.799753	1	0.0144727	0.61204	1	0.00867978	-0.505554	0
ENSG00000132718	23208	SYT11	synaptotagmin 11	1	2	0.00279023	1.83557	1	0.0382795	0.638275	1	0.115262	-0.200763	0
ENSG00000132773	114034	TOE1	target of EGR1, exonuclease	1	2	0.0264547	1.01672	1	0.0224596	0.950669	1	0.247159	-0.14709	0
ENSG00000133422	22880	MORC2	MORC family CW-type zinc finger 2	1	2	0.032612	0.986088	1	0.0772643	0.609683	1	0.565514	-0.104892	0
ENSG00000133424	9215	LARGE1	LARGE xylosyl- and glucuronyltransferase 1	1	2	0.0187823	0.780118	1	0.00395783	1.61852	1	0.0134464	0.374576	0
ENSG00000133612	116988	AGAP3	ArfGAP with GTPase domain, ankyrin repeat and PH domain 3	1	2	0.00479076	1.04874	1	0.021958	0.961184	1	0.0183072	-0.447793	0
ENSG00000133639	694	BTG1	BTG anti-proliferation factor 1	1	2	0.00572971	1.99157	1	0.00954464	1.0609	1	0.0755443	0.276037	0
ENSG00000133657	79572	ATP13A3	ATPase 13A3	1	2	0.0252212	0.839132	1	0.00559721	1.13724	1	0.394136	-0.073474	0
ENSG00000133794	406	ARNTL	aryl hydrocarbon receptor nuclear translocator like	1	2	0.00272653	1.4795	1	0.00823853	1.04572	1	0.0206362	-0.547542	0
ENSG00000133805	272	AMPD3	adenosine monophosphate deaminase 3	1	2	0.00153017	2.83126	1	0.0014259	1.17775	1	0.0265517	-0.178452	0
ENSG00000133961	8650	NUMB	NUMB endocytic adaptor protein	1	2	0.000976888	2.28151	1	0.00414485	2.08832	1	0.0110558	-0.449923	0
ENSG00000134107	8553	BHLHE40	basic helix-loop-helix family member e40	1	2	0.00178829	1.7383	1	0.00829023	1.04742	1	0.0659252	0.137415	0
ENSG00000134109	9695	EDEM1	ER degradation enhancing alpha-mannosidase like protein 1	1	2	0.00414538	1.4828	1	0.00907375	1.20018	1	0.0268686	-0.326397	0
ENSG00000134324	23175	LPIN1	lipin 1	1	2	0.0182082	0.760872	1	0.00578387	1.655	1	0.0422712	0.33854	0
ENSG00000134686	1912	PHC2	polyhomeotic homolog 2	1	2	0.00534739	1.89061	1	0.00153176	2.09867	1	0.136155	-0.13824	0
ENSG00000134802	29015	SLC43A3	solute carrier family 43 member 3	1	2	0.00268137	2.30683	1	0.0123534	0.70478	1	0.0599104	-0.286379	0
ENSG00000134809	26519	TIMM10	translocase of inner mitochondrial membrane 10	1	2	0.0293587	0.634777	1	0.00614802	0.812104	1	0.0635882	-0.204446	0
ENSG00000134815	9704	DHX34	DExH-box helicase 34	1	2	0.00768066	1.10348	1	0.00700723	0.921652	1	0.374576	-0.0465705	0
ENSG00000134884	55082	ARGLU1	arginine and glutamate rich 1	1	2	0.0662909	0.829923	1	0.0675842	0.658095	1	0.0499391	-0.488562	0
ENSG00000134900	7174	TPP2	tripeptidyl peptidase 2	1	2	0.0146394	1.22235	1	0.0134541	1.16989	1	0.463298	-0.074127	0
ENSG00000135045	55071	C9orf40	chromosome 9 open reading frame 40	1	2	0.0368063	0.614109	1	0.013677	0.588597	1	0.281861	0.0939666	0
ENSG00000135047	1514	CTSL	cathepsin L	1	2	0.00173871	2.83533	1	0.00235533	3.28111	1	0.139839	0.165606	0
ENSG00000135048	23670	CEMIP2	cell migration inducing hyaluronidase 2	1	2	0.00267766	1.75888	1	0.00612262	1.32645	1	0.0254264	-0.450192	0
ENSG00000135111	6926	TBX3	T-box transcription factor 3	1	2	0.00590967	1.59347	1	0.0107405	1.59087	1	0.0701745	0.376193	0
ENSG00000135241	50640	PNPLA8	patatin like phospholipase domain containing 8	1	2	0.00321983	1.70975	1	0.0264012	0.694283	1	0.0343516	-0.395789	0
ENSG00000135318	4907	NT5E	5'-nucleotidase ecto	1	2	0.00527929	1.56363	1	4.25194e-05	2.30099	1	0.00971154	0.337649	0
ENSG00000135912	9654	TTLL4	tubulin tyrosine ligase like 4	1	2	0.00459862	0.717177	1	0.00310251	1.24464	1	0.038268	-0.183494	0
ENSG00000135932	51719	CAB39	calcium binding protein 39	1	2	0.0168153	0.65378	1	0.00832569	0.849195	1	0.0188686	-0.480357	0
ENSG00000136141	23143	LRCH1	leucine rich repeats and calponin homology domain containing 1	1	2	0.00966161	0.910206	1	0.0123342	0.851261	1	0.160286	-0.0486978	0
ENSG00000136158	10253	SPRY2	sprouty RTK signaling antagonist 2	1	2	0.00211415	3.30082	1	0.000188073	3.92797	1	0.0287301	0.269595	0
ENSG00000136159	55270	NUDT15	nudix hydrolase 15	1	2	0.0552474	0.774637	1	0.0280716	0.699311	1	0.0363534	-0.118746	0
ENSG00000136161	1102	RCBTB2	RCC1 and BTB domain containing protein 2	1	2	0.0161274	1.19287	1	0.0248767	1.08747	1	0.3639	0.068642	0
ENSG00000136244	3569	IL6	interleukin 6	1	2	0.0544446	1.21363	1	0.0307775	1.68405	1	0.250237	0.319327	0
ENSG00000136518	86	ACTL6A	actin like 6A	1	2	0.0106683	0.845223	1	0.011018	0.804084	1	0.0247743	-0.268832	0
ENSG00000136560	10010	TANK	TRAF family member associated NFKB activator	1	2	0.0129882	1.53495	1	0.00594231	0.837458	1	0.0724435	-0.368408	0
ENSG00000136830	64855	NIBAN2	niban apoptosis regulator 2	1	2	0.0204596	0.726397	1	0.011403	1.02595	1	0.0502396	0.329064	0
ENSG00000136840	27090	ST6GALNAC4	ST6 N-acetylgalactosaminide alpha-2,6-sialyltransferase 4	1	2	0.00961027	0.804389	1	7.78052e-05	1.50949	1	0.0146074	-0.575505	0
ENSG00000136854	6812	STXBP1	syntaxin binding protein 1	1	2	0.0282742	0.827945	1	0.0287331	0.717801	1	0.100408	0.298214	0
ENSG00000136861	55755	CDK5RAP2	CDK5 regulatory subunit associated protein 2	1	2	0.00502399	1.31695	1	0.00893384	1.32797	1	0.220805	-0.0616221	0
ENSG00000136888	9550	ATP6V1G1	ATPase H+ transporting V1 subunit G1	1	2	0.00317008	1.67327	1	0.0133548	1.04928	1	0.0463428	-0.405539	0
ENSG00000136908	8818	DPM2	dolichyl-phosphate mannosyltransferase subunit 2, regulatory	1	2	0.0655979	0.599053	1	0.00908839	0.682771	1	0.038997	-0.439602	0
ENSG00000136950	81873	ARPC5L	actin related protein 2/3 complex subunit 5 like	1	2	0.0168144	1.22108	1	0.00230028	1.81215	1	0.0876856	0.237238	0
ENSG00000137185	7746	ZSCAN9	zinc finger and SCAN domain containing 9	1	2	0.0497359	0.758427	1	0.0293908	0.633838	1	0.0123075	-0.366238	0
ENSG00000137266	63027	SLC22A23	solute carrier family 22 member 23	1	2	0.00288991	2.81877	1	0.00465667	2.91098	1	0.599323	0.0378066	0
ENSG00000137343	79969	ATAT1	alpha tubulin acetyltransferase 1	1	2	0.0407025	0.885595	1	0.0560395	0.780486	1	0.616831	-0.0700155	0
ENSG00000137547	29088	MRPL15	mitochondrial ribosomal protein L15	1	2	0.00766302	1.94164	1	0.00655663	1.88513	1	0.159233	0.112629	0
ENSG00000137819	54852	PAQR5	progestin and adipoQ receptor family member 5	1	2	0.00419689	3.49796	1	0.00662862	2.5937	1	0.103558	-0.359349	0
ENSG00000137947	2959	GTF2B	general transcription factor IIB	1	2	0.00299876	1.2845	1	0.00189132	0.88694	1	0.00380205	-0.458857	0
ENSG00000138074	8884	SLC5A6	solute carrier family 5 member 6	1	2	0.0215582	0.718802	1	0.00764379	0.994852	1	0.0503317	-0.289476	0
ENSG00000138166	1847	DUSP5	dual specificity phosphatase 5	1	2	0.00153811	2.0824	1	0.000164432	2.34471	1	0.0318384	0.276262	0
ENSG00000138443	10152	ABI2	abl interactor 2	1	2	0.0155707	0.659491	1	0.0105309	0.88237	1	0.505947	0.0311836	0
ENSG00000138660	55435	AP1AR	adaptor related protein complex 1 associated regulatory protein	1	2	0.000157022	1.31337	1	0.000125794	0.745963	1	0.00475882	-0.212604	0
ENSG00000139146	58516	SINHCAF	SIN3-HDAC complex associated factor	1	2	0.00382904	0.775238	1	0.0085898	0.989325	1	0.022922	0.382249	0
ENSG00000139163	55500	ETNK1	ethanolamine kinase 1	1	2	0.0123987	1.29543	1	0.000831863	1.26055	1	0.63519	0.0167317	0
ENSG00000139289	22822	PHLDA1	pleckstrin homology like domain family A member 1	1	2	0.00138267	1.93388	1	0.000979711	2.46697	1	0.0105907	-0.494041	0
ENSG00000139318	1848	DUSP6	dual specificity phosphatase 6	1	2	0.000264467	4.01188	1	0.000415667	4.97956	1	0.0366838	-0.186961	0
ENSG00000139323	282809	POC1B	POC1 centriolar protein B	1	2	0.010123	1.66325	1	0.00304499	1.74881	1	0.0810295	0.276268	0
ENSG00000139625	7786	MAP3K12	mitogen-activated protein kinase kinase kinase 12	1	2	0.00992466	1.24635	1	0.00522706	0.951091	1	0.0275293	-0.378107	0
ENSG00000139725	54509	RHOF	ras homolog family member F, filopodia associated	1	2	0.024639	0.808852	1	0.00526359	1.47018	1	0.175164	0.148123	0
ENSG00000139977	122830	NAA30	N(alpha)-acetyltransferase 30, NatC catalytic subunit	1	2	0.0153721	1.42045	1	0.00202241	1.15894	1	0.225775	-0.111047	0
ENSG00000140104	122616	CLBA1	clathrin binding box of aftiphilin containing 1	1	2	0.00711591	1.51517	1	0.0277322	0.860507	1	0.0213645	-0.306638	0
ENSG00000140199	9990	SLC12A6	solute carrier family 12 member 6	1	2	0.0139019	2.00587	1	0.0149982	1.24896	1	0.20861	-0.0985889	0
ENSG00000140332	7090	TLE3	TLE family member 3, transcriptional corepressor	1	2	0.0132788	1.56902	1	0.012443	1.85587	1	0.326895	-0.146625	0
ENSG00000140406	59274	TLNRD1	talin rod domain containing 1	1	2	0.0080584	0.923068	1	0.00472036	0.951897	1	0.027169	-0.238893	0
ENSG00000140455	9960	USP3	ubiquitin specific peptidase 3	1	2	0.0160169	1.01802	1	0.00249259	0.779467	1	0.0350226	0.467286	0
ENSG00000140474	25989	ULK3	unc-51 like kinase 3	1	2	0.0420983	1.18472	1	0.00209368	1.51354	1	0.166986	-0.12173	0
ENSG00000140563	55784	MCTP2	multiple C2 and transmembrane domain containing 2	1	2	0.000123853	0.68305	1	0.00699418	1.01206	1	0.0274612	-0.0701335	0
ENSG00000140564	5045	FURIN	furin, paired basic amino acid cleaving enzyme	1	2	0.00108327	1.44723	1	0.0044813	2.56519	1	0.0400196	-0.172837	0
ENSG00000140691	79798	ARMC5	armadillo repeat containing 5	1	2	0.0182235	0.785558	1	0.0140113	0.72268	1	0.035457	0.426378	0
ENSG00000140854	10300	KATNB1	katanin regulatory subunit B1	1	2	0.0126152	1.33966	1	0.0174388	0.602786	1	0.0773035	-0.27917	0
ENSG00000140983	89941	RHOT2	ras homolog family member T2	1	2	0.0705446	0.611924	1	0.00489944	1.28286	1	0.0951011	0.288331	0
ENSG00000141098	81577	GFOD2	glucose-fructose oxidoreductase domain containing 2	1	2	0.00472777	0.80776	1	0.00434263	1.39459	1	0.0497182	0.182657	0
ENSG00000141378	51651	PTRH2	peptidyl-tRNA hydrolase 2	1	2	0.0580988	0.7456	1	0.0317735	0.904923	1	0.519859	0.0230146	0
ENSG00000141499	55135	WRAP53	WD repeat containing antisense to TP53	1	2	0.0186055	0.86085	1	0.0074132	0.663693	1	0.0331745	-0.162739	0
ENSG00000141562	26502	NARF	nuclear prelamin A recognition factor	1	2	0.00223606	0.927659	1	0.00605663	0.933167	1	0.041826	0.230732	0
ENSG00000141858	90378	SAMD1	sterile alpha motif domain containing 1	1	2	0.0315025	0.89959	1	0.0225727	0.68429	1	0.232157	-0.160014	0
ENSG00000141933	91978	TPGS1	tubulin polyglutamylase complex subunit 1	1	2	0.0111366	0.814809	1	0.0474308	0.883568	1	0.0274102	-0.430856	0
ENSG00000141956	63977	PRDM15	PR/SET domain 15	1	2	0.0162594	0.71133	1	0.00143719	0.77062	1	0.0483656	-0.223998	0
ENSG00000142178	150094	SIK1	salt inducible kinase 1	1	2	0.00733539	1.55977	1	0.00360109	0.999164	1	0.325603	0.0623843	0
ENSG00000142409	126208	ZNF787	zinc finger protein 787	1	2	0.0125143	0.965305	1	0.0543557	0.618935	1	0.0819605	-0.142069	0
ENSG00000142546	51070	NOSIP	nitric oxide synthase interacting protein	1	2	0.017704	0.855633	1	0.0386445	0.749497	1	0.258878	0.0830302	0
ENSG00000142634	79180	EFHD2	EF-hand domain family member D2	1	2	0.00801112	1.40856	1	0.00355646	1.69805	1	0.0122403	-0.535902	0
ENSG00000142686	127703	C1orf216	chromosome 1 open reading frame 216	1	2	0.0365305	1.0399	1	0.0228954	1.80475	1	0.285488	-0.141287	0
ENSG00000143013	8543	LMO4	LIM domain only 4	1	2	0.0205436	0.859963	1	0.00187332	1.14365	1	0.0692299	0.238456	0
ENSG00000143033	22823	MTF2	metal response element binding transcription factor 2	1	2	0.00231246	1.16395	1	0.00375494	0.936856	1	0.425933	-0.0184251	0
ENSG00000143067	90874	ZNF697	zinc finger protein 697	1	2	0.00576059	2.67443	1	0.00316267	2.27502	1	0.0397959	-0.487057	0
ENSG00000143256	5202	PFDN2	prefoldin subunit 2	1	2	0.00933345	1.67276	1	0.0104577	1.92465	1	0.0738181	-0.411333	0
ENSG00000143384	4170	MCL1	MCL1 apoptosis regulator, BCL2 family member	1	2	0.000236944	3.07782	1	0.00210074	2.84717	1	0.0657908	-0.147381	0
ENSG00000143621	3608	ILF2	interleukin enhancer binding factor 2	1	2	0.0124852	0.61021	1	0.00113179	0.760445	1	0.00895483	-0.540692	0
ENSG00000143751	163859	SDE2	SDE2 telomere maintenance homolog	1	2	0.00331581	0.87586	1	0.00976447	0.879538	1	0.0443961	0.187996	0
ENSG00000144021	9391	CIAO1	cytosolic iron-sulfur assembly component 1	1	2	0.0134501	0.865136	1	0.00844725	0.849076	1	0.0365393	-0.330532	0
ENSG00000144118	5899	RALB	RAS like proto-oncogene B	1	2	0.000956422	0.739925	1	0.0046205	0.902613	1	0.0155224	0.285102	0
ENSG00000144597	85403	EAF1	ELL associated factor 1	1	2	0.00934633	0.766557	1	0.00999947	0.736505	1	0.304492	-0.0424592	0
ENSG00000144655	64651	CSRNP1	cysteine and serine rich nuclear protein 1	1	2	0.0023084	2.43321	1	0.00346154	1.58419	1	0.11098	-0.159771	0
ENSG00000145354	493856	CISD2	CDGSH iron sulfur domain 2	1	2	0.0146016	0.653555	1	0.0360399	0.70814	1	0.0672489	0.166024	0
ENSG00000145358	115265	DDIT4L	DNA damage inducible transcript 4 like	1	2	0.00629728	1.67519	1	0.00475688	1.07839	1	0.480461	-0.0399185	0
ENSG00000146083	22838	RNF44	ring finger protein 44	1	2	0.0409164	0.880385	1	0.00832075	0.82396	1	0.530469	0.0753648	0
ENSG00000146112	170954	PPP1R18	protein phosphatase 1 regulatory subunit 18	1	2	0.00304975	1.24528	1	0.000868737	0.692009	1	0.0168668	-0.381735	0
ENSG00000146386	58527	ABRACL	ABRA C-terminal like	1	2	0.000357798	1.13712	1	0.0300148	2.02849	1	0.00857675	-0.153667	0
ENSG00000146409	116843	SLC18B1	solute carrier family 18 member B1	1	2	0.012072	1.22326	1	0.0129506	1.29891	1	0.205061	0.13417	0
ENSG00000146676	5814	PURB	purine rich element binding protein B	1	2	0.0502579	0.967063	1	0.026648	1.09365	1	0.368329	-0.169346	0
ENSG00000146834	56257	MEPCE	methylphosphate capping enzyme	1	2	0.016142	1.87464	1	0.011823	0.667393	1	0.0645547	-0.575748	0
ENSG00000147010	30011	SH3KBP1	SH3 domain containing kinase binding protein 1	1	2	0.00238938	2.51409	1	0.00277117	1.70073	1	0.0390984	-0.419529	0
ENSG00000147065	4478	MSN	moesin	1	2	0.00340155	0.629419	1	0.0190127	0.706016	1	0.968311	0.00120899	0
ENSG00000147383	50814	NSDHL	NAD(P) dependent steroid dehydrogenase-like	1	2	0.0125249	1.04456	1	0.00695695	1.29547	1	0.209194	-0.022033	0
ENSG00000147416	526	ATP6V1B2	ATPase H+ transporting V1 subunit B2	1	2	0.00129869	1.23342	1	0.00800653	0.716642	1	0.0154227	-0.509941	0
ENSG00000147457	91782	CHMP7	charged multivesicular body protein 7	1	2	0.00569425	1.45176	1	0.00302241	1.2103	1	0.0148477	-0.417438	0
ENSG00000147459	80005	DOCK5	dedicator of cytokinesis 5	1	2	0.0210355	1.6405	1	0.0187798	1.24956	1	0.65842	0.0633232	0
ENSG00000147650	29967	LRP12	LDL receptor related protein 12	1	2	0.0117599	1.06017	1	0.0112417	0.692101	1	0.732736	-0.0123925	0
ENSG00000148400	4851	NOTCH1	notch receptor 1	1	2	0.0173428	2.03298	1	0.012904	1.80376	1	0.0543818	-0.481479	0
ENSG00000148834	9446	GSTO1	glutathione S-transferase omega 1	1	2	0.00244778	1.17339	1	0.00573289	1.48918	1	0.554652	0.0230146	0
ENSG00000148843	22984	PDCD11	programmed cell death 11	1	2	0.0184123	0.637301	1	0.0710485	0.660681	1	0.826047	-0.012351	0
ENSG00000149260	726	CAPN5	calpain 5	1	2	0.0169291	0.716582	1	0.00278088	1.26696	1	0.59863	-0.0271813	0
ENSG00000149541	26229	B3GAT3	beta-1,3-glucuronyltransferase 3	1	2	0.0191777	0.760999	1	0.00121277	1.31255	1	0.0564023	0.124905	0
ENSG00000149743	83707	TRPT1	tRNA phosphotransferase 1	1	2	0.00648324	1.15527	1	0.00966073	1.00314	1	0.15324	-0.0849882	0
ENSG00000149761	84304	NUDT22	nudix hydrolase 22	1	2	0.00866655	0.734039	1	0.000912138	0.944152	1	0.0262599	0.240771	0
ENSG00000149782	5331	PLCB3	phospholipase C beta 3	1	2	0.00421595	1.00744	1	0.00557992	1.34943	1	0.135065	0.0849878	0
ENSG00000149923	5531	PPP4C	protein phosphatase 4 catalytic subunit	1	2	0.0310907	0.705194	1	0.00591567	1.04188	1	0.147633	-0.0646215	0
ENSG00000149948	8091	HMGA2	high mobility group AT-hook 2	1	2	0.0052814	1.58411	1	0.0139434	0.629287	1	0.038605	-0.374929	0
ENSG00000150977	196383	RILPL2	Rab interacting lysosomal protein like 2	1	2	0.0244661	0.761959	1	0.0114248	0.783564	1	0.41454	-0.0633927	0
ENSG00000151229	114134	SLC2A13	solute carrier family 2 member 13	1	2	0.00342308	3.11118	1	0.00401606	1.34904	1	0.750857	0.0157276	0
ENSG00000151247	1977	EIF4E	eukaryotic translation initiation factor 4E	1	2	0.00100988	0.59666	1	0.000122618	1.16745	1	0.0068368	-0.225045	0
ENSG00000151287	93081	TEX30	testis expressed 30	1	2	0.00438691	0.962086	1	0.00462632	1.51611	1	0.318071	0.023305	0
ENSG00000151576	79691	QTRT2	queuine tRNA-ribosyltransferase accessory subunit 2	1	2	0.00835992	0.903553	1	0.0101556	0.789036	1	0.296777	-0.0288605	0
ENSG00000151617	1909	EDNRA	endothelin receptor type A	1	2	0.0158511	1.12776	1	0.0183543	1.88683	1	0.209525	0.164382	0
ENSG00000151743	196394	AMN1	antagonist of mitotic exit network 1 homolog	1	2	0.00329128	1.55019	1	0.027413	0.691537	1	0.0371147	-0.510815	0
ENSG00000151746	636	BICD1	BICD cargo adaptor 1	1	2	0.0178059	0.873235	1	0.00172442	1.15875	1	0.0770999	-0.109035	0
ENSG00000152133	253635	GPATCH11	G-patch domain containing 11	1	2	0.0148781	0.952135	1	0.0236815	0.807906	1	0.0600016	-0.297896	0
ENSG00000152484	219333	USP12	ubiquitin specific peptidase 12	1	2	0.00481775	1.96217	1	0.00609174	1.86305	1	0.0718836	-0.25721	0
ENSG00000152990	166647	ADGRA3	adhesion G protein-coupled receptor A3	1	2	0.00978511	1.45739	1	0.00399206	2.22811	1	0.102236	-0.176932	0
ENSG00000153214	84910	TMEM87B	transmembrane protein 87B	1	2	0.0132262	0.840046	1	0.00331246	1.08296	1	0.0439132	0.214223	0
ENSG00000153767	2960	GTF2E1	general transcription factor IIE subunit 1	1	2	0.0227059	0.807873	1	0.00347177	1.6372	1	0.237485	0.083783	0
ENSG00000153922	1105	CHD1	chromodomain helicase DNA binding protein 1	1	2	0.0214811	0.92894	1	0.0244382	0.86929	1	0.104055	-0.327446	0
ENSG00000153936	9653	HS2ST1	heparan sulfate 2-O-sulfotransferase 1	1	2	0.007232	1.81061	1	0.00264697	2.06961	1	0.160664	0.147734	0
ENSG00000154122	56172	ANKH	ANKH inorganic pyrophosphate transport regulator	1	2	0.00152223	1.98365	1	0.00589414	2.14103	1	0.0346805	-0.241063	0
ENSG00000154642	54149	C21orf91	chromosome 21 open reading frame 91	1	2	0.0159393	0.755646	1	0.0100854	0.65303	1	0.0170457	-0.476343	0
ENSG00000154832	30827	CXXC1	CXXC finger protein 1	1	2	0.0238696	1.19559	1	0.0197655	0.603761	1	0.049967	-0.451405	0
ENSG00000155097	528	ATP6V1C1	ATPase H+ transporting V1 subunit C1	1	2	0.0181828	0.675003	1	9.65067e-05	0.590101	1	0.790396	0.00827351	0
ENSG00000155256	118813	ZFYVE27	zinc finger FYVE-type containing 27	1	2	0.0175423	1.15987	1	0.0131667	0.955072	1	0.0497842	-0.327928	0
ENSG00000156711	5603	MAPK13	mitogen-activated protein kinase 13	1	2	0.00189026	2.38568	1	0.000399965	2.01049	1	0.0914764	0.13663	0
ENSG00000156860	64319	FBRS	fibrosin	1	2	0.0084723	1.05499	1	0.00605716	0.817371	1	0.0351807	-0.350216	0
ENSG00000157216	23648	SSBP3	single stranded DNA binding protein 3	1	2	0.0212436	1.49794	1	0.0119451	1.90274	1	0.431631	-0.110237	0
ENSG00000157224	9069	CLDN12	claudin 12	1	2	0.0287292	0.877256	1	0.00929605	0.632495	1	0.0520081	0.307472	0
ENSG00000157827	114793	FMNL2	formin like 2	1	2	0.0369723	0.59971	1	0.0195893	0.828351	1	0.154418	0.150402	0
ENSG00000158792	124044	SPATA2L	spermatogenesis associated 2 like	1	2	0.00611097	1.7336	1	0.00197142	1.75153	1	0.0287502	-0.369506	0
ENSG00000158805	92822	ZNF276	zinc finger protein 276	1	2	0.00173977	0.886552	1	0.00893172	0.616133	1	0.0208612	-0.329882	0
ENSG00000158864	4720	NDUFS2	NADH:ubiquinone oxidoreductase core subunit S2	1	2	0.00690932	0.739588	1	0.00448236	0.829982	1	0.024632	-0.219818	0
ENSG00000158966	57685	CACHD1	cache domain containing 1	1	2	0.000226359	1.48525	1	0.000520995	1.27565	1	0.00811291	0.190624	0
ENSG00000158987	51735	RAPGEF6	Rap guanine nucleotide exchange factor 6	1	2	0.0161336	0.689493	1	0.0108682	0.785016	1	0.0279053	0.417576	0
ENSG00000159086	94104	PAXBP1	PAX3 and PAX7 binding protein 1	1	2	0.0361066	0.868984	1	0.00989855	1.08821	1	0.02518	-0.471016	0
ENSG00000159167	6781	STC1	stanniocalcin 1	1	2	0.00232639	4.38654	1	0.000493649	3.93344	1	0.401446	-0.0726211	0
ENSG00000160214	8568	RRP1	ribosomal RNA processing 1	1	2	0.0294007	1.06934	1	0.00478476	1.06202	1	0.0693186	0.178929	0
ENSG00000160469	84446	BRSK1	BR serine/threonine kinase 1	1	2	0.0238125	0.67546	1	0.00168825	0.817642	1	0.0380849	0.36793	0
ENSG00000160570	162989	DEDD2	death effector domain containing 2	1	2	0.0138885	1.82257	1	0.0278213	0.817658	1	0.220895	-0.157946	0
ENSG00000160584	23387	SIK3	SIK family kinase 3	1	2	0.00565896	0.702399	1	0.00945889	1.19904	1	0.0603091	0.176746	0
ENSG00000160741	200186	CRTC2	CREB regulated transcription coactivator 2	1	2	0.0187683	1.06813	1	0.011747	0.715228	1	0.0832629	-0.218436	0
ENSG00000160877	112939	NACC1	nucleus accumbens associated 1	1	2	0.0151824	0.910591	1	0.00571807	1.37959	1	0.035654	-0.382099	0
ENSG00000160888	9592	IER2	immediate early response 2	1	2	0.0117151	1.95867	1	0.00508769	1.73397	1	0.0351281	-0.414001	0
ENSG00000160991	80228	ORAI2	ORAI calcium release-activated calcium modulator 2	1	2	0.0185432	0.75911	1	0.00713956	1.4291	1	0.00115226	-0.343194	0
ENSG00000161544	114757	CYGB	cytoglobin	1	2	0.00213973	4.09694	1	3.7403e-05	3.08903	1	0.0447701	-0.352597	0
ENSG00000161642	25946	ZNF385A	zinc finger protein 385A	1	2	0.00768384	1.08007	1	0.00170924	1.87322	1	0.0181388	0.465249	0
ENSG00000161791	91010	FMNL3	formin like 3	1	2	0.00411997	2.19917	1	0.00265067	2.33333	1	0.0407414	-0.222708	0
ENSG00000161835	160622	TAMALIN	general receptor for phosphoinositides 1 associated scaffold protein	1	2	0.00787579	2.16072	1	0.00624224	1.47071	1	0.131989	-0.213946	0
ENSG00000161960	1973	EIF4A1	eukaryotic translation initiation factor 4A1	1	2	0.0359868	1.27241	1	0.0222551	1.01575	1	0.032861	-0.479066	0
ENSG00000161996	197335	WDR90	WD repeat domain 90	1	2	0.0203073	1.29965	1	0.02121	0.730321	1	0.0261112	0.579856	0
ENSG00000162066	51005	AMDHD2	amidohydrolase domain containing 2	1	2	0.0476265	1.04333	1	0.00916867	1.27255	1	0.144599	-0.149374	0
ENSG00000162231	10482	NXF1	nuclear RNA export factor 1	1	2	0.036777	0.872704	1	0.00882463	0.784972	1	0.0310549	-0.43966	0
ENSG00000162413	9903	KLHL21	kelch like family member 21	1	2	0.00564273	0.633638	1	0.0400044	0.758941	1	0.688375	0.0226198	0
ENSG00000162419	10691	GMEB1	glucocorticoid modulatory element binding protein 1	1	2	0.00324753	0.879287	1	0.00527152	1.19029	1	0.0287052	-0.0866628	0
ENSG00000162618	64123	ADGRL4	adhesion G protein-coupled receptor L4	1	2	0.0136882	2.57178	1	0.00628952	2.69333	1	0.843371	0.0204415	0
ENSG00000162636	284611	FAM102B	family with sequence similarity 102 member B	1	2	0.00848183	1.36252	1	0.000901729	1.69366	1	0.0647871	0.101648	0
ENSG00000163132	4487	MSX1	msh homeobox 1	1	2	0.00905469	1.78831	1	0.00580169	3.02142	1	0.116574	0.311789	0
ENSG00000163297	118429	ANTXR2	ANTXR cell adhesion molecule 2	1	2	0.00092096	1.75397	1	4.74594e-05	1.93729	1	0.00264502	0.562889	0
ENSG00000163349	204851	HIPK1	homeodomain interacting protein kinase 1	1	2	0.0587766	0.595145	1	0.0357482	0.690154	1	0.048563	-0.332286	0
ENSG00000163481	64320	RNF25	ring finger protein 25	1	2	0.0154023	0.792112	1	0.0223797	0.875309	1	0.0250506	-0.436051	0
ENSG00000163536	5274	SERPINI1	serpin family I member 1	1	2	0.0184472	1.2582	1	0.0138222	0.993049	1	0.115719	0.234844	0
ENSG00000163597	100507246	SNHG16	small nucleolar RNA host gene 16	1	2	0.0139439	0.881127	1	0.00267625	1.02725	1	0.0343537	0.140771	0
ENSG00000163637	166336	PRICKLE2	prickle planar cell polarity protein 2	1	2	0.0528924	0.596213	1	0.0036856	1.33585	1	0.0540249	0.19042	0
ENSG00000163660	57018	CCNL1	cyclin L1	1	2	0.0734642	0.58114	1	0.0464321	0.614512	1	0.130091	-0.191708	0
ENSG00000163683	201895	SMIM14	small integral membrane protein 14	1	2	0.00964379	1.16715	1	0.00293613	1.64675	1	0.150981	-0.112688	0
ENSG00000163788	54861	SNRK	SNF related kinase	1	2	0.00893878	0.699708	1	0.00340367	0.694083	1	0.00544901	-0.554395	0
ENSG00000163795	130557	ZNF513	zinc finger protein 513	1	2	0.0293582	1.22293	1	0.00814961	1.40658	1	0.0843176	-0.37814	0
ENSG00000163879	7802	DNALI1	dynein axonemal light intermediate chain 1	1	2	0.011795	1.3484	1	0.00151464	1.10669	1	0.226038	0.0997797	0
ENSG00000163961	165918	RNF168	ring finger protein 168	1	2	0.00174471	0.924052	1	0.0103133	0.947794	1	0.133226	0.0804161	0
ENSG00000163964	54965	PIGX	phosphatidylinositol glycan anchor biosynthesis class X	1	2	0.0217327	0.595088	1	0.0158956	0.90432	1	0.0508864	-0.309639	0
ENSG00000164038	133308	SLC9B2	solute carrier family 9 member B2	1	2	0.0287105	0.66343	1	0.0186657	0.810709	1	0.025296	0.480694	0
ENSG00000164080	23132	RAD54L2	RAD54 like 2	1	2	0.0291406	0.758202	1	0.00637721	1.28811	1	0.0189007	-0.369438	0
ENSG00000164171	3673	ITGA2	integrin subunit alpha 2	1	2	0.0108066	3.03128	1	0.00306316	3.13377	1	0.658246	0.0283477	0
ENSG00000164327	253260	RICTOR	RPTOR independent companion of MTOR complex 2	1	2	0.0213312	1.33499	1	0.0240595	0.64525	1	0.0297285	-0.438438	0
ENSG00000164403	134549	SHROOM1	shroom family member 1	1	2	0.0461537	0.833319	1	0.0073638	0.618631	1	0.0022156	-0.509575	0
ENSG00000164620	285613	RELL2	RELT like 2	1	2	0.0208952	1.16664	1	0.013708	0.74577	1	0.076448	0.0800949	0
ENSG00000164647	26872	STEAP1	STEAP family member 1	1	2	0.00323465	2.33549	1	0.00420819	3.45336	1	0.0522795	0.420792	0
ENSG00000164654	54468	MIOS	meiosis regulator for oocyte development	1	2	0.00433716	0.611407	1	0.0179866	0.601106	1	0.0416438	-0.296544	0
ENSG00000164687	2171	FABP5	fatty acid binding protein 5	1	2	0.00663197	1.70573	1	0.0335448	0.818066	1	0.00864273	-0.368602	0
ENSG00000164929	79870	BAALC	BAALC binder of MAP3K1 and KLF4	1	2	0.00320801	2.43236	1	0.00208857	3.64099	1	0.103728	0.181465	0
ENSG00000165169	6990	DYNLT3	dynein light chain Tctex-type 3	1	2	0.0348613	0.823941	1	0.0109908	1.49441	1	0.0239003	0.432926	0
ENSG00000165233	84270	CARD19	caspase recruitment domain family member 19	1	2	0.000781934	2.09232	1	0.00463903	1.34519	1	0.00269919	-0.535288	0
ENSG00000165280	7415	VCP	valosin containing protein	1	2	0.00140102	0.646496	1	0.0134645	1.05592	1	0.0126351	-0.495186	0
ENSG00000165359	203522	INTS6L	integrator complex subunit 6 like	1	2	0.0437535	0.72717	1	0.0252657	0.789236	1	0.448755	0.0676942	0
ENSG00000165506	55172	DNAAF2	dynein axonemal assembly factor 2	1	2	0.0492782	0.823038	1	0.0528934	0.899758	1	0.0150224	-0.537467	0
ENSG00000165675	10495	ENOX2	ecto-NOX disulfide-thiol exchanger 2	1	2	0.000465243	0.831389	1	0.0607653	0.605192	1	0.00589432	-0.575938	0
ENSG00000165684	6621	SNAPC4	small nuclear RNA activating complex polypeptide 4	1	2	0.0167826	0.854674	1	0.00814273	0.973824	1	0.576427	0.0218442	0
ENSG00000165689	10807	ENTR1	endosome associated trafficking regulator 1	1	2	0.0191835	0.81903	1	0.0150485	1.0789	1	0.237436	0.0933284	0
ENSG00000165724	116225	ZMYND19	zinc finger MYND-type containing 19	1	2	0.0316664	0.580671	1	0.0180335	1.16854	1	0.0189495	-0.490908	0
ENSG00000165801	55701	ARHGEF40	Rho guanine nucleotide exchange factor 40	1	2	0.00507869	1.04844	1	0.00470783	1.10424	1	0.0192669	-0.274167	0
ENSG00000165891	144455	E2F7	E2F transcription factor 7	1	2	0.00246154	3.95772	1	0.000430134	2.84498	1	0.416538	-0.0641659	0
ENSG00000165895	143872	ARHGAP42	Rho GTPase activating protein 42	1	2	0.0121651	0.87101	1	0.00717272	0.652175	1	0.00802999	-0.50871	0
ENSG00000165943	64112	MOAP1	modulator of apoptosis 1	1	2	0.0494467	0.961768	1	0.011124	1.11047	1	0.191535	0.0918518	0
ENSG00000166033	5654	HTRA1	HtrA serine peptidase 1	1	2	0.00519195	1.30157	1	0.00585109	0.891723	1	0.0178405	-0.402151	0
ENSG00000166068	161742	SPRED1	sprouty related EVH1 domain containing 1	1	2	0.00830769	1.22825	1	0.000782463	1.50902	1	0.022799	0.56438	0
ENSG00000166401	5271	SERPINB8	serpin family B member 8	1	2	0.01621	2.53154	1	0.0145785	1.84201	1	0.181667	-0.337562	0
ENSG00000166446	124359	CDYL2	chromodomain Y like 2	1	2	0.00176217	3.13479	1	0.000526288	3.10174	1	0.0548813	-0.205294	0
ENSG00000166471	440026	TMEM41B	transmembrane protein 41B	1	2	0.016201	0.852299	1	0.00851129	0.888699	1	0.0865743	-0.166768	0
ENSG00000166478	7702	ZNF143	zinc finger protein 143	1	2	0.0128862	0.699239	1	0.0147795	0.652058	1	0.0529598	-0.254982	0
ENSG00000166508	4176	MCM7	minichromosome maintenance complex component 7	1	2	0.021597	1.1196	1	0.00789961	0.770146	1	0.0557382	-0.126652	0
ENSG00000166595	51647	CIAO2B	cytosolic iron-sulfur assembly component 2B	1	2	0.0204621	0.69133	1	0.0238857	0.790197	1	0.0568888	-0.249128	0
ENSG00000166750	162394	SLFN5	schlafen family member 5	1	2	0.0159778	1.02548	1	0.00637103	0.82858	1	0.0960471	-0.164949	0
ENSG00000166780	89927	BMERB1	bMERB domain containing 1	1	2	0.00124153	1.09238	1	0.0179317	1.53083	1	0.0304005	0.36036	0
ENSG00000166900	6809	STX3	syntaxin 3	1	2	0.0390062	0.766308	1	0.00657269	0.840275	1	0.0495887	-0.291011	0
ENSG00000166922	6447	SCG5	secretogranin V	1	2	0.00110603	4.05329	1	0.00283398	4.99752	1	0.226047	0.064674	0
ENSG00000167065	150290	DUSP18	dual specificity phosphatase 18	1	2	0.01612	1.61867	1	0.00777735	1.96063	1	0.0215947	0.107639	0
ENSG00000167113	51117	COQ4	coenzyme Q4	1	2	0.00636168	1.47812	1	0.0165679	1.13854	1	0.0238421	-0.526091	0
ENSG00000167244	3481	IGF2	insulin like growth factor 2	1	2	0.037795	1.10402	1	0.0398765	0.73719	1	0.199729	0.275534	0
ENSG00000167291	125058	TBC1D16	TBC1 domain family member 16	1	2	0.0180972	0.620105	1	0.0043915	1.23118	1	0.832745	0.00471919	0
ENSG00000167395	9726	ZNF646	zinc finger protein 646	1	2	0.00268613	1.17353	1	0.0103193	0.673928	1	0.00425917	-0.517948	0
ENSG00000167491	54815	GATAD2A	GATA zinc finger domain containing 2A	1	2	0.00478917	1.06113	1	0.00756157	1.62481	1	0.0658913	0.143016	0
ENSG00000167554	162963	ZNF610	zinc finger protein 610	1	2	0.0213262	0.916953	1	0.0551667	0.850698	1	0.0846256	0.317761	0
ENSG00000167615	114823	LENG8	leukocyte receptor cluster member 8	1	2	0.0816055	0.825488	1	0.0173698	0.756241	1	0.0339587	-0.443407	0
ENSG00000167981	146434	ZNF597	zinc finger protein 597	1	2	0.00777223	0.84321	1	0.0578156	0.930892	1	0.0843188	-0.182364	0
ENSG00000168010	89849	ATG16L2	autophagy related 16 like 2	1	2	0.0364732	0.965582	1	0.0346494	0.74335	1	0.00759562	-0.539878	0
ENSG00000168439	10963	STIP1	stress induced phosphoprotein 1	1	2	0.010768	0.784869	1	0.00301094	1.32044	1	0.0274785	-0.37182	0
ENSG00000168701	29100	TMEM208	transmembrane protein 208	1	2	0.0272279	0.86544	1	0.014632	0.88604	1	0.00892025	-0.42559	0
ENSG00000168944	153241	CEP120	centrosomal protein 120	1	2	0.00428352	0.945432	1	0.0239682	0.669499	1	0.0476281	0.221159	0
ENSG00000169258	114787	GPRIN1	G protein regulated inducer of neurite outgrowth 1	1	2	0.00221983	2.80807	1	0.00116584	3.36081	1	0.129936	0.13155	0
ENSG00000169306	11141	IL1RAPL1	interleukin 1 receptor accessory protein like 1	1	2	0.00397618	3.12976	1	0.00397424	3.28398	1	0.150588	0.136781	0
ENSG00000169429	3576	CXCL8	C-X-C motif chemokine ligand 8	1	2	0.000184016	8.44143	1	0.000190014	7.49035	1	1.235e-05	-0.196381	0
ENSG00000169554	9839	ZEB2	zinc finger E-box binding homeobox 2	1	2	0.0280896	0.589714	1	0.00488197	0.709691	1	0.00947301	0.425161	0
ENSG00000169718	64118	DUS1L	dihydrouridine synthase 1 like	1	2	0.0596835	0.690653	1	0.00733257	1.14435	1	0.0438185	-0.536327	0
ENSG00000169756	3987	LIMS1	LIM zinc finger domain containing 1	1	2	0.0138239	0.869589	1	0.00805346	0.752479	1	0.0412618	0.400038	0
ENSG00000169826	55454	CSGALNACT2	chondroitin sulfate N-acetylgalactosaminyltransferase 2	1	2	0.0069192	2.14645	1	0.00175953	1.88226	1	0.0819647	-0.28293	0
ENSG00000169926	51621	KLF13	Kruppel like factor 13	1	2	0.00158574	1.40497	1	0.0119667	0.772963	1	0.00276129	-0.415313	0
ENSG00000170035	10477	UBE2E3	ubiquitin conjugating enzyme E2 E3	1	2	0.00216849	1.05468	1	0.00029693	1.96062	1	0.0162911	0.321722	0
ENSG00000170260	7988	ZNF212	zinc finger protein 212	1	2	0.0131175	0.592547	1	0.0386052	0.916513	1	0.00654622	0.296944	0
ENSG00000170270	84520	GON7	GON7 subunit of KEOPS complex	1	2	0.0210281	1.37095	1	0.00784474	2.25553	1	0.125841	0.225501	0
ENSG00000170325	56980	PRDM10	PR/SET domain 10	1	2	0.0205346	0.942824	1	0.0314464	0.908461	1	0.0414755	-0.457399	0
ENSG00000170345	2353	FOS	Fos proto-oncogene, AP-1 transcription factor subunit	1	2	0.000776641	3.64062	1	8.53917e-05	2.40943	1	0.0172154	-0.388994	0
ENSG00000170396	91752	ZNF804A	zinc finger protein 804A	1	2	0.00565773	1.19063	1	0.00460321	1.43677	1	0.0256014	0.529979	0
ENSG00000170445	3035	HARS1	histidyl-tRNA synthetase 1	1	2	0.000607445	1.05177	1	0.00386944	1.4415	1	0.0439	0.146992	0
ENSG00000170473	84305	PYM1	PYM homolog 1, exon junction complex associated factor	1	2	0.0100598	0.764398	1	0.0289513	0.691041	1	0.0480268	-0.472363	0
ENSG00000170522	79071	ELOVL6	ELOVL fatty acid elongase 6	1	2	0.00480663	0.972997	1	0.00841831	1.4069	1	0.0410205	-0.217633	0
ENSG00000170852	25948	KBTBD2	kelch repeat and BTB domain containing 2	1	2	0.00277347	1.35792	1	0.0098054	0.879759	1	0.442052	0.0283473	0
ENSG00000171159	79095	C9orf16	chromosome 9 open reading frame 16	1	2	0.0200399	0.813254	1	0.0281946	1.03097	1	0.0559051	-0.522167	0
ENSG00000171161	79894	ZNF672	zinc finger protein 672	1	2	0.0220963	0.639181	1	0.0120974	0.585538	1	0.0539573	-0.305782	0
ENSG00000171222	51282	SCAND1	SCAN domain containing 1	1	2	0.0526635	0.62466	1	0.0247634	0.837266	1	0.128134	-0.280928	0
ENSG00000171453	9533	POLR1C	RNA polymerase I and III subunit C	1	2	0.0134294	0.818008	1	0.0102301	1.01276	1	0.655421	0.0166122	0
ENSG00000171466	54811	ZNF562	zinc finger protein 562	1	2	0.0193121	0.611771	1	0.00543719	1.08029	1	0.0310079	0.277218	0
ENSG00000171574	201514	ZNF584	zinc finger protein 584	1	2	0.00876905	0.801602	1	0.0455482	0.762393	1	0.0193617	-0.355605	0
ENSG00000171621	80176	SPSB1	splA/ryanodine receptor domain and SOCS box containing 1	1	2	0.00140508	2.20171	1	0.000613797	2.37892	1	0.0105436	0.415792	0
ENSG00000171723	10243	GPHN	gephyrin	1	2	0.00403158	0.789873	1	0.0149121	0.81164	1	0.0561884	-0.179437	0
ENSG00000171823	144699	FBXL14	F-box and leucine rich repeat protein 14	1	2	0.00664273	1.59824	1	0.00543207	1.40266	1	0.146413	-0.103479	0
ENSG00000172009	7064	THOP1	thimet oligopeptidase 1	1	2	0.0039102	0.591129	1	0.0139944	0.593861	1	0.0682027	0.15243	0
ENSG00000172331	669	BPGM	bisphosphoglycerate mutase	1	2	0.0045891	1.87574	1	0.00418296	2.83433	1	0.0268084	-0.501697	0
ENSG00000172531	5499	PPP1CA	protein phosphatase 1 catalytic subunit alpha	1	2	0.000815808	1.01232	1	0.000842625	1.06273	1	0.0317685	-0.114158	0
ENSG00000172932	338692	ANKRD13D	ankyrin repeat domain 13D	1	2	0.00728899	1.60152	1	0.0132073	1.70753	1	0.0417512	-0.532786	0
ENSG00000173153	2101	ESRRA	estrogen related receptor alpha	1	2	0.00466002	1.35003	1	0.00730963	1.9655	1	0.056343	-0.298456	0
ENSG00000173166	65059	RAPH1	Ras association (RalGDS/AF-6) and pleckstrin homology domains 1	1	2	0.0283379	1.12674	1	0.0535522	0.803379	1	0.436674	-0.14034	0
ENSG00000173473	6599	SMARCC1	SWI/SNF related, matrix associated, actin dependent regulator of chromatin subfamily c member 1	1	2	0.0113492	0.709435	1	0.000836097	1.09501	1	0.00233098	0.571977	0
ENSG00000173653	9986	RCE1	Ras converting CAAX endopeptidase 1	1	2	0.0262858	1.06141	1	0.0182345	0.98074	1	0.168176	0.179309	0
ENSG00000174013	200933	FBXO45	F-box protein 45	1	2	0.0432002	0.595723	1	0.00996595	0.89525	1	0.940291	-0.00304524	0
ENSG00000174028	286460	FAM3C2	family with sequence similarity 3 member C2 (pseudogene)	1	2	0.0373769	0.923131	1	0.0504792	1.05353	1	0.15749	0.0913789	0
ENSG00000174236	387849	REP15	RAB15 effector protein	1	2	0.012395	0.766849	1	0.0513638	0.673861	1	0.097648	0.277856	0
ENSG00000174238	5306	PITPNA	phosphatidylinositol transfer protein alpha	1	2	0.0141628	0.872851	1	0.000305399	1.06878	1	0.0036205	-0.477077	0
ENSG00000174705	285590	SH3PXD2B	SH3 and PX domains 2B	1	2	0.0261935	0.67673	1	0.0138712	1.00842	1	0.010479	-0.459495	0
ENSG00000174791	9610	RIN1	Ras and Rab interactor 1	1	2	0.0150822	1.6284	1	0.00312985	1.37619	1	0.0281951	0.553503	0
ENSG00000174839	201627	DENND6A	DENN domain containing 6A	1	2	0.0055591	0.951721	1	0.0223552	0.838704	1	0.0683133	0.157513	0
ENSG00000174840	201626	PDE12	phosphodiesterase 12	1	2	0.0288742	0.632648	1	0.0234365	0.844373	1	0.0522048	-0.418726	0
ENSG00000174939	253982	ASPHD1	aspartate beta-hydroxylase domain containing 1	1	2	0.00507163	1.63045	1	0.0299072	1.71528	1	0.0425891	-0.229376	0
ENSG00000174943	253980	KCTD13	potassium channel tetramerization domain containing 13	1	2	0.00533116	0.980623	1	0.00450212	1.22661	1	0.0461457	-0.220916	0
ENSG00000175166	5708	PSMD2	proteasome 26S subunit, non-ATPase 2	1	2	0.0115602	0.617005	1	0.00521824	1.04153	1	0.0330325	0.240825	0
ENSG00000175376	84285	EIF1AD	eukaryotic translation initiation factor 1A domain containing	1	2	0.00927805	0.70946	1	0.00700018	0.861163	1	0.24413	0.034381	0
ENSG00000175482	57804	POLD4	DNA polymerase delta 4, accessory subunit	1	2	0.0303121	0.852757	1	0.0419435	0.734792	1	0.15472	-0.22898	0
ENSG00000175505	23529	CLCF1	cardiotrophin like cytokine factor 1	1	2	0.0102754	1.22976	1	0.0147634	1.81933	1	0.0640483	-0.201779	0
ENSG00000175832	2118	ETV4	ETS variant transcription factor 4	1	2	0.00797071	2.62299	1	0.00301023	2.02569	1	0.169297	-0.191824	0
ENSG00000175866	10458	BAIAP2	BAR/IMD domain containing adaptor protein 2	1	2	0.00686803	1.32358	1	0.00409421	1.21098	1	0.193719	0.0528586	0
ENSG00000176105	7525	YES1	YES proto-oncogene 1, Src family tyrosine kinase	1	2	0.000311927	1.01469	1	0.0198402	0.819072	1	0.149585	-0.135502	0
ENSG00000176887	6664	SOX11	SRY-box transcription factor 11	1	2	0.0101299	1.79009	1	0.0112583	1.18935	1	0.203274	0.111466	0
ENSG00000176953	84901	NFATC2IP	nuclear factor of activated T cells 2 interacting protein	1	2	0.0191129	0.62185	1	0.0166029	0.865835	1	0.195434	0.110478	0
ENSG00000176973	23625	FAM89B	family with sequence similarity 89 member B	1	2	0.0079573	0.814828	1	0.028283	1.10347	1	0.14633	-0.0872244	0
ENSG00000176994	140775	SMCR8	SMCR8-C9orf72 complex subunit	1	2	0.0107544	0.759208	1	0.0242611	0.621133	1	0.0580286	-0.197325	0
ENSG00000177169	8408	ULK1	unc-51 like autophagy activating kinase 1	1	2	0.0416274	0.843546	1	0.00268419	1.29792	1	0.166619	0.213711	0
ENSG00000177189	6197	RPS6KA3	ribosomal protein S6 kinase A3	1	2	0.0144635	2.03063	1	0.00319601	2.016	1	0.130118	0.293882	0
ENSG00000177192	80324	PUS1	pseudouridine synthase 1	1	2	0.00624524	0.664721	1	0.00523095	1.26695	1	0.0509686	-0.232232	0
ENSG00000177283	8325	FZD8	frizzled class receptor 8	1	2	0.00183398	3.54316	1	0.00468207	2.89599	1	0.0648045	0.36547	0
ENSG00000177426	7050	TGIF1	TGFB induced factor homeobox 1	1	2	0.000839626	2.05124	1	0.01932	1.12062	1	0.127791	-0.0722568	0
ENSG00000177542	79751	SLC25A22	solute carrier family 25 member 22	1	2	0.0262934	0.813435	1	0.00180275	0.880679	1	0.115229	-0.106225	0
ENSG00000177548	79874	RABEP2	rabaptin, RAB GTPase binding effector protein 2	1	2	0.0100409	0.617912	1	0.00294478	1.2022	1	0.0207532	0.380113	0
ENSG00000178075	54762	GRAMD1C	GRAM domain containing 1C	1	2	0.0134091	1.10198	1	0.00815843	0.861872	1	0.0245529	-0.500214	0
ENSG00000178531	404217	CTXN1	cortexin 1	1	2	0.0276147	1.65077	1	0.0315773	0.820601	1	0.278872	-0.11778	0
ENSG00000178607	2081	ERN1	endoplasmic reticulum to nucleus signaling 1	1	2	0.0116794	1.51919	1	0.0179744	0.803651	1	0.0591311	-0.233112	0
ENSG00000178950	2580	GAK	cyclin G associated kinase	1	2	7.03952e-05	1.14136	1	0.00535021	1.31225	1	0.00197001	-0.283844	0
ENSG00000178951	51341	ZBTB7A	zinc finger and BTB domain containing 7A	1	2	0.00270907	0.86485	1	0.00294689	0.937503	1	0.00563373	-0.426141	0
ENSG00000179361	10620	ARID3B	AT-rich interaction domain 3B	1	2	0.00413126	2.34449	1	0.0064049	2.10851	1	0.0645893	-0.26756	0
ENSG00000179950	22827	PUF60	poly(U) binding splicing factor 60	1	2	0.00837844	0.766287	1	0.0155796	0.892484	1	0.014575	-0.432566	0
ENSG00000180758	80045	GPR157	G protein-coupled receptor 157	1	2	0.00202911	2.44591	1	0.0280737	1.2276	1	0.153264	-0.24106	0
ENSG00000182117	55505	NOP10	NOP10 ribonucleoprotein	1	2	0.0107828	0.748666	1	0.011635	1.01747	1	0.0528417	-0.300139	0
ENSG00000182287	8905	AP1S2	adaptor related protein complex 1 subunit sigma 2	1	2	0.00691778	2.00099	1	0.000109033	0.752946	1	0.0284998	-0.462216	0
ENSG00000182318	342945	ZSCAN22	zinc finger and SCAN domain containing 22	1	2	0.0112846	0.790227	1	0.0221643	0.958771	1	0.150731	0.162656	0
ENSG00000182704	25987	TSKU	tsukushi, small leucine rich proteoglycan	1	2	0.010482	0.903009	1	0.0019049	0.815944	1	0.0386516	0.298067	0
ENSG00000182810	55794	DDX28	DEAD-box helicase 28	1	2	0.0202398	0.870536	1	0.0078855	0.807826	1	0.0337059	-0.5666	0
ENSG00000183155	5877	RABIF	RAB interacting factor	1	2	0.00543913	0.715376	1	0.00454128	1.11634	1	0.0372691	-0.223617	0
ENSG00000183621	220929	ZNF438	zinc finger protein 438	1	2	0.00312562	2.29831	1	0.00650212	1.56415	1	0.0272773	-0.520443	0
ENSG00000183876	340075	ARSI	arylsulfatase family member I	1	2	0.029879	0.650521	1	0.0312945	1.01994	1	0.0576237	-0.379168	0
ENSG00000183963	6525	SMTN	smoothelin	1	2	0.00761062	1.67795	1	0.018368	1.2519	1	0.114135	0.292198	0
ENSG00000184216	3654	IRAK1	interleukin 1 receptor associated kinase 1	1	2	0.029662	0.759447	1	0.000109562	1.25441	1	0.105837	0.169448	0
ENSG00000184402	26039	SS18L1	SS18L1 subunit of BAF chromatin remodeling complex	1	2	0.00832022	1.05624	1	0.0200963	1.46424	1	0.800005	-0.00670326	0
ENSG00000185022	23764	MAFF	MAF bZIP transcription factor F	1	2	0.00602999	1.65799	1	0.00790438	0.99663	1	0.1084	0.184403	0
ENSG00000185043	10519	CIB1	calcium and integrin binding 1	1	2	0.00670166	0.972726	1	0.000999118	1.57594	1	0.0120288	0.321685	0
ENSG00000185085	80789	INTS5	integrator complex subunit 5	1	2	0.0388206	0.831775	1	0.0348499	0.734759	1	0.0833964	-0.48161	0
ENSG00000185344	23545	ATP6V0A2	ATPase H+ transporting V0 subunit a2	1	2	0.0173024	0.788045	1	0.0165533	1.0783	1	0.0296948	-0.334493	0
ENSG00000185359	9146	HGS	hepatocyte growth factor-regulated tyrosine kinase substrate	1	2	0.0160988	0.919467	1	0.00405963	0.986009	1	0.035247	0.296303	0
ENSG00000185619	10336	PCGF3	polycomb group ring finger 3	1	2	0.00529058	0.747731	1	0.0229917	0.608807	1	0.813857	0.00836183	0
ENSG00000185621	89782	LMLN	leishmanolysin like peptidase	1	2	0.0241955	0.843426	1	0.00838603	0.589571	1	0.0689444	0.299723	0
ENSG00000185800	1762	DMWD	DM1 locus, WD repeat containing	1	2	0.00979764	1.10811	1	0.00137862	0.750606	1	0.00295536	-0.451977	0
ENSG00000185825	10134	BCAP31	B cell receptor associated protein 31	1	2	0.00222759	1.12972	1	0.00273994	1.32932	1	0.0280503	0.202108	0
ENSG00000185947	10308	ZNF267	zinc finger protein 267	1	2	0.0110374	1.24526	1	0.000421313	1.70705	1	0.03638	0.264376	0
ENSG00000185989	22821	RASA3	RAS p21 protein activator 3	1	2	0.00376147	1.12265	1	0.00525776	1.55896	1	0.0533031	0.248013	0
ENSG00000186088	54103	GSAP	gamma-secretase activating protein	1	2	0.000626323	1.28064	1	0.00675706	1.30188	1	0.964794	0.00117263	0
ENSG00000186222	55330	BLOC1S4	biogenesis of lysosomal organelles complex 1 subunit 4	1	2	0.00415702	0.653734	1	0.0167959	1.10221	1	0.0245228	0.260201	0
ENSG00000186432	3840	KPNA4	karyopherin subunit alpha 4	1	2	0.0260764	0.791939	1	0.0026856	0.965696	1	0.0511784	-0.458579	0
ENSG00000186480	3638	INSIG1	insulin induced gene 1	1	2	0.0054753	2.09968	1	0.00910004	1.34097	1	0.0403696	-0.520824	0
ENSG00000187193	4501	MT1X	metallothionein 1X	1	2	0.00360762	2.76443	1	0.0284644	1.76978	1	0.118318	-0.450789	0
ENSG00000187531	51547	SIRT7	sirtuin 7	1	2	0.0451318	0.756884	1	0.00888303	0.646808	1	0.0408437	-0.204169	0
ENSG00000187583	84069	PLEKHN1	pleckstrin homology domain containing N1	1	2	0.00298183	2.28981	1	0.0142107	1.34095	1	0.360605	0.0652466	0
ENSG00000187678	81848	SPRY4	sprouty RTK signaling antagonist 4	1	2	0.00103423	3.80928	1	0.0010711	4.87225	1	0.258134	-0.0874249	0
ENSG00000187688	51393	TRPV2	transient receptor potential cation channel subfamily V member 2	1	2	0.00749224	0.925171	1	0.00010127	1.55581	1	0.00928864	-0.341876	0
ENSG00000187742	79048	SECISBP2	SECIS binding protein 2	1	2	0.00213003	1.24146	1	0.00630399	1.12838	1	0.13443	-0.04482	0
ENSG00000187801	65243	ZFP69B	ZFP69 zinc finger protein B	1	2	0.00914379	1.70176	1	0.0109891	2.31963	1	0.0421773	0.548909	0
ENSG00000187961	339451	KLHL17	kelch like family member 17	1	2	0.0283687	1.13481	1	0.00864114	0.751766	1	0.0335939	-0.307945	0
ENSG00000188070	65998	C11orf95	chromosome 11 open reading frame 95	1	2	0.00144284	1.24532	1	0.00316849	1.02643	1	0.00118402	-0.261962	0
ENSG00000188215	123879	DCUN1D3	defective in cullin neddylation 1 domain containing 3	1	2	0.00758539	0.789358	1	0.000349682	0.895285	1	0.0332627	-0.166837	0
ENSG00000188295	79862	ZNF669	zinc finger protein 669	1	2	0.0422897	0.685689	1	0.0112572	0.792749	1	0.0242881	-0.480151	0
ENSG00000188522	644815	FAM83G	family with sequence similarity 83 member G	1	2	0.00371665	1.43627	1	0.00652311	1.13763	1	0.0276835	0.338959	0
ENSG00000188643	140576	S100A16	S100 calcium binding protein A16	1	2	0.0036939	1.30807	1	0.0053735	1.60031	1	0.109846	0.133344	0
ENSG00000188766	399473	SPRED3	sprouty related EVH1 domain containing 3	1	2	0.000488356	2.40053	1	0.0016235	2.41422	1	0.163629	-0.064789	0
ENSG00000188976	26155	NOC2L	NOC2 like nucleolar associated transcriptional repressor	1	2	0.0182376	0.976886	1	0.00742484	0.844102	1	0.0797182	-0.218879	0
ENSG00000189134	222698	NKAPL	NFKB activating protein like	1	2	0.0430376	1.01917	1	0.0859647	0.633707	1	0.29612	0.220278	0
ENSG00000189171	6284	S100A13	S100 calcium binding protein A13	1	2	0.00771189	2.14353	1	0.00259898	1.89765	1	0.0166378	-0.423154	0
ENSG00000189320	389558	FAM180A	family with sequence similarity 180 member A	1	2	0.0283986	1.68502	1	0.00394654	1.83772	1	0.103222	0.166794	0
ENSG00000196123	653319	KIAA0895L	KIAA0895 like	1	2	0.0333125	0.852327	1	0.0193269	0.586982	1	0.0375215	0.247406	0
ENSG00000196352	1604	CD55	CD55 molecule (Cromer blood group)	1	2	0.00196648	3.05566	1	0.0015554	2.93052	1	0.129816	-0.138091	0
ENSG00000196372	79754	ASB13	ankyrin repeat and SOCS box containing 13	1	2	0.023683	0.724257	1	0.00817378	1.05887	1	0.0902505	-0.141311	0
ENSG00000196449	79693	YRDC	yrdC N6-threonylcarbamoyltransferase domain containing	1	2	0.0148917	1.39133	1	0.0204795	1.6128	1	0.0270231	-0.411399	0
ENSG00000196460	731220	RFX8	RFX family member 8, lacking RFX DNA binding domain	1	2	0.0108215	3.68716	1	0.000446542	4.31514	1	0.0324143	0.566248	0
ENSG00000196611	4312	MMP1	matrix metallopeptidase 1	1	2	0.000294284	5.68674	1	0.000494707	7.709	1	0.998688	0	0
ENSG00000196782	55534	MAML3	mastermind like transcriptional coactivator 3	1	2	0.00897318	0.996965	1	0.0377673	0.72316	1	0.0427078	0.358112	0
ENSG00000196878	3914	LAMB3	laminin subunit beta 3	1	2	0.000537579	2.35144	1	0.00194213	3.04072	1	0.0285344	0.212713	0
ENSG00000196937	10447	FAM3C	family with sequence similarity 3 member C	1	2	0.0127768	1.11679	1	0.0249511	1.41516	1	0.134052	-0.0984742	0
ENSG00000196998	11152	WDR45	WD repeat domain 45	1	2	0.00803934	1.61966	1	0.00129781	0.933594	1	0.0168206	-0.519774	0
ENSG00000197019	29950	SERTAD1	SERTA domain containing 1	1	2	0.00171418	2.22255	1	0.00308169	2.47103	1	0.0567883	0.165384	0
ENSG00000197170	5718	PSMD12	proteasome 26S subunit, non-ATPase 12	1	2	0.0385921	0.749552	1	0.0181879	0.587841	1	0.435857	0.0741055	0
ENSG00000197183	140688	NOL4L	nucleolar protein 4 like	1	2	0.0112564	1.21619	1	0.00128899	1.45502	1	0.104279	-0.184296	0
ENSG00000197312	84301	DDI2	DNA damage inducible 1 homolog 2	1	2	0.0113499	2.48066	1	0.00251676	1.9104	1	0.0450026	-0.5773	0
ENSG00000197323	51592	TRIM33	tripartite motif containing 33	1	2	0.00550353	1.10876	1	0.00120748	1.13508	1	0.146715	-0.0572615	0
ENSG00000197329	57162	PELI1	pellino E3 ubiquitin protein ligase 1	1	2	0.00669654	1.99954	1	0.00125847	1.93365	1	0.0988943	0.178187	0
ENSG00000197548	10533	ATG7	autophagy related 7	1	2	0.00116761	0.626075	1	0.0308629	0.725305	1	0.00723977	-0.220121	0
ENSG00000197632	5055	SERPINB2	serpin family B member 2	1	2	0.000874912	5.02004	1	0.00414961	6.43913	1	0.15281	0.10469	0
ENSG00000197912	6687	SPG7	SPG7 matrix AAA peptidase subunit, paraplegin	1	2	0.0129259	0.663004	1	0.00158663	1.13021	1	0.0266179	0.376592	0
ENSG00000198018	57089	ENTPD7	ectonucleoside triphosphate diphosphohydrolase 7	1	2	0.0102945	1.41117	1	0.000831157	2.67286	1	0.0713733	-0.286767	0
ENSG00000198026	63925	ZNF335	zinc finger protein 335	1	2	0.0619515	0.766369	1	0.0303006	0.69512	1	0.658672	-0.0272088	0
ENSG00000198042	84549	MAK16	MAK16 homolog	1	2	0.0263871	0.687327	1	0.00455187	0.839328	1	0.0595409	0.276947	0
ENSG00000198089	9814	SFI1	SFI1 centrin binding protein	1	2	0.0174367	0.916903	1	0.00447177	0.654499	1	0.982485	0.000326523	0
ENSG00000198142	65124	SOWAHC	sosondowah ankyrin repeat domain family member C	1	2	0.000696895	2.10525	1	0.000980769	1.79583	1	0.00936715	0.540351	0
ENSG00000198168	258010	SVIP	small VCP interacting protein	1	2	0.00552064	3.24038	1	0.00187597	3.89776	1	0.0562631	0.329149	0
ENSG00000198324	144717	PHETA1	PH domain containing endocytic trafficking adaptor 1	1	2	0.0100995	1.43257	1	0.000860797	2.32408	1	0.0542512	0.366484	0
ENSG00000198369	200734	SPRED2	sprouty related EVH1 domain containing 2	1	2	0.00203352	1.98314	1	0.000268701	2.25881	1	0.0284367	0.296749	0
ENSG00000198482	388558	ZNF808	zinc finger protein 808	1	2	0.0633271	0.832619	1	0.0142378	0.857743	1	0.693803	-0.0468438	0
ENSG00000198563	7919	DDX39B	DExD-box helicase 39B	1	2	0.0846473	0.723287	1	0.011665	0.735045	1	0.250757	0.0841429	0
ENSG00000198668	801	CALM1	calmodulin 1	1	2	0.0031976	0.627899	1	0.0121886	0.588155	1	0.00155699	-0.378188	0
ENSG00000198680	286319	TUSC1	tumor suppressor candidate 1	1	2	0.0128855	0.813018	1	0.0128188	0.893359	1	0.00152011	-0.18927	0
ENSG00000198732	64093	SMOC1	SPARC related modular calcium binding 1	1	2	0.000628617	3.5717	1	0.00143772	5.04865	1	0.0346293	-0.317096	0
ENSG00000198742	57154	SMURF1	SMAD specific E3 ubiquitin protein ligase 1	1	2	0.00256263	0.846316	1	0.0013368	1.28034	1	0.0130251	0.276819	0
ENSG00000198768	164284	APCDD1L	APC down-regulated 1 like	1	2	0.00661838	3.61393	1	0.00510727	3.07191	1	0.137514	-0.355631	0
ENSG00000198805	4860	PNP	purine nucleoside phosphorylase	1	2	0.000899612	3.38567	1	0.00103158	4.07855	1	0.137624	-0.0991914	0
ENSG00000198894	85457	CIPC	CLOCK interacting pacemaker	1	2	0.0151284	0.658485	1	0.0143109	1.00452	1	0.332717	-0.0446834	0
ENSG00000198900	7150	TOP1	DNA topoisomerase I	1	2	0.0619098	1.13073	1	0.0107174	2.09945	1	0.785458	0.0493446	0
ENSG00000198972	406887	MIRLET7E	microRNA let-7e	1	2	0.0753818	1.48968	1	0.0835113	0.904574	1	0.408334	-0.228356	0
ENSG00000199032	494337	MIR425	microRNA 425	1	2	0.065262	1.64622	1	0.0795933	1.07546	1	0.0524056	-0.483534	0
ENSG00000199179	406891	MIRLET7I	microRNA let-7i	1	2	0.056885	1.66455	1	0.057997	2.08541	1	0.141205	0.595698	0
ENSG00000201302	26783	SNORA65	small nucleolar RNA, H/ACA box 65	1	2	0.0883733	1.05178	1	0.057121	1.4281	1	0.970027	0.00785826	0
ENSG00000201367	106479797	RNU6-522P	RNA, U6 small nuclear 522, pseudogene	1	2	0.0312227	0.802882	1	0.0923731	0.830318	1	0.101475	0.770991	0
ENSG00000202474	100873536	RNA5SP283	RNA, 5S ribosomal pseudogene 283	1	2	0.0550642	2.30936	1	0.0856392	1.02312	1	0.0961789	0.246661	0
ENSG00000204209	1616	DAXX	death domain associated protein	1	2	0.00895625	0.875881	1	0.0310912	0.639015	1	0.0573758	-0.351856	0
ENSG00000204439	57827	C6orf47	chromosome 6 open reading frame 47	1	2	0.0222867	0.65781	1	0.00402488	0.924954	1	0.2082	-0.0885687	0
ENSG00000204442	728215	FAM155A	family with sequence similarity 155 member A	1	2	0.013012	1.34337	1	0.010293	2.05668	1	0.222364	0.171684	0
ENSG00000204713	5987	TRIM27	tripartite motif containing 27	1	2	0.0110379	0.596129	1	0.000788814	0.912866	1	0.0142906	-0.283502	0
ENSG00000205155	55851	PSENEN	presenilin enhancer, gamma-secretase subunit	1	2	0.0280704	0.830607	1	0.0718938	0.935664	1	0.228137	-0.126489	0
ENSG00000205250	1874	E2F4	E2F transcription factor 4	1	2	0.030593	0.665005	1	0.00737209	1.19004	1	0.0108052	-0.536673	0
ENSG00000205336	9289	ADGRG1	adhesion G protein-coupled receptor G1	1	2	0.0302911	2.05905	1	0.0144294	2.34155	1	0.135203	-0.584904	0
ENSG00000205730	162073	ITPRIPL2	ITPRIP like 2	1	2	0.0172581	1.15506	1	0.0059446	1.24158	1	0.0371771	-0.514876	0
ENSG00000205903	100131017	ZNF316	zinc finger protein 316	1	2	0.00139538	0.637434	1	0.018922	0.914142	1	0.486815	-0.0065933	0
ENSG00000206432	645369	TMEM200C	transmembrane protein 200C	1	2	0.00965879	1.23921	1	0.0242255	0.618257	1	0.0175007	-0.340101	0
ENSG00000206634	677807	SNORA22	small nucleolar RNA, H/ACA box 22	1	2	0.0364303	1.02088	1	0.0293163	0.713585	1	0.333957	-0.136748	0
ENSG00000206712	100873741	RNU6-26P	RNA, U6 small nuclear 26, pseudogene	1	2	0.0482636	1.5323	1	0.0140999	2.72085	1	0.266846	0.315402	0
ENSG00000207554	693232	MIR647	microRNA 647	1	2	0.0897493	1.13584	1	0.0599472	1.24501	1	0.180765	0.461392	0
ENSG00000207574	724031	MIR661	microRNA 661	1	2	0.0413687	1.05083	1	0.0916304	0.725964	1	0.199043	0.171484	0
ENSG00000207741	693175	MIR590	microRNA 590	1	2	0.024611	1.09567	1	0.0308476	1.35272	1	0.142556	0.274811	0
ENSG00000211455	23012	STK38L	serine/threonine kinase 38 like	1	2	0.00159351	2.92472	1	0.000952893	3.05923	1	0.0622052	-0.252011	0
ENSG00000212719	339263	LINC02693	long intergenic non-protein coding RNA 2693	1	2	0.0117498	0.730344	1	0.00670872	0.778859	1	0.0404141	0.159827	0
ENSG00000213190	10962	MLLT11	MLLT11 transcription factor 7 cofactor	1	2	0.00942025	1.34789	1	0.00195501	2.41047	1	0.0198488	0.523303	0
ENSG00000213588	221504	ZBTB9	zinc finger and BTB domain containing 9	1	2	0.0495508	0.6582	1	0.0339495	0.678178	1	0.0939333	-0.318637	0
ENSG00000213753	65996	CENPBD1P1	CENPB DNA-binding domains containing 1 pseudogene 1	1	2	0.0128641	0.979968	1	0.0113447	0.760863	1	0.073307	-0.267758	0
ENSG00000213923	1454	CSNK1E	casein kinase 1 epsilon	1	2	0.0072096	1.34343	1	0.0153151	0.777773	1	0.100053	0.109014	0
ENSG00000213965	390916	NUDT19	nudix hydrolase 19	1	2	0.0355189	0.692869	1	0.0439996	0.625364	1	0.957323	0.00302151	0
ENSG00000214706	7866	IFRD2	interferon related developmental regulator 2	1	2	0.0179476	0.844736	1	0.0309275	0.732178	1	0.049858	-0.327341	0
ENSG00000215417	407975	MIR17HG	miR-17-92a-1 cluster host gene	1	2	0.0311805	0.938473	1	0.0244966	0.829844	1	0.731019	-0.0205919	0
ENSG00000217801	100288175	AL390719.1	protein tyrosine phosphatase family pseudogene	1	2	0.000758116	3.06408	1	0.0334541	1.27426	1	0.0280381	-0.361976	0
ENSG00000222112	106480837	RN7SKP16	RN7SK pseudogene 16	1	2	0.0219086	1.85055	1	0.0382444	1.90777	1	0.664067	0.0614748	0
ENSG00000223496	118460	EXOSC6	exosome component 6	1	2	0.0260655	0.811192	1	0.0434037	0.848581	1	0.0491814	0.155569	0
ENSG00000223764	100130417	LINC02593	long intergenic non-protein coding RNA 2593	1	2	0.0185937	1.30204	1	0.0312872	0.863775	1	0.216391	0.130921	0
ENSG00000224775	286494	BRAFP1	BRAF pseudogene 1	1	2	0.0365397	0.736852	1	0.0207562	1.11593	1	0.788752	0.0280032	0
ENSG00000224870	148413	MRPL20-AS1	MRPL20 antisense RNA 1	1	2	0.0172793	0.79068	1	0.0033638	0.929245	1	0.00804552	-0.528271	0
ENSG00000224975	8552	INE1	inactivation escape 1	1	2	0.0253957	1.12349	1	0.0247232	0.9656	1	0.131273	-0.266829	0
ENSG00000225190	9842	PLEKHM1	pleckstrin homology and RUN domain containing M1	1	2	0.00375194	0.865779	1	0.0286246	0.880562	1	0.0227489	-0.426128	0
ENSG00000225697	65010	SLC26A6	solute carrier family 26 member 6	1	2	0.0328088	1.03841	1	0.0102904	1.06723	1	0.0550058	0.280515	0
ENSG00000227053	102724094	MUC12-AS1	MUC12 antisense RNA 1	1	2	0.0619559	1.08566	1	0.0411969	1.47362	1	0.286386	-0.271964	0
ENSG00000228201	0	AL022341.1	novel transcript	1	2	0.0718814	1.48151	1	0.0803522	0.823363	1	0.54829	-0.135168	0
ENSG00000228300	55009	FAM174C	family with sequence similarity 174 member C	1	2	0.0208747	0.728172	1	0.0254266	0.725347	1	0.932423	-0.00431763	0
ENSG00000228794	107984850	LINC01128	long intergenic non-protein coding RNA 1128	1	2	0.00776147	1.03019	1	0.00254093	0.950366	1	0.0275455	0.374641	0
ENSG00000229152	100505494	ANKRD10-IT1	ANKRD10 intronic transcript 1	1	2	0.0361071	0.69487	1	0.0281341	0.701382	1	0.286697	-0.0962069	0
ENSG00000229320	90133	KRT8P12	keratin 8 pseudogene 12	1	2	0.0179829	1.27337	1	0.00541549	1.13607	1	0.115869	0.0826941	0
ENSG00000229334	0	AC046143.1	novel transcript	1	2	0.0750621	1.41512	1	0.0169534	1.2726	1	0.152482	-0.169916	0
ENSG00000229931	101928433	ATXN1-AS1	ATXN1 antisense RNA 1	1	2	0.0800014	0.839759	1	0.0318634	0.580249	1	0.35858	0.174775	0
ENSG00000231906	0	AC016397.1	cytochrome c oxidase subunit VIIb (COX7B) pseudogene	1	2	0.0948888	1.59595	1	0.0565916	0.947075	1	0.155479	0.402721	0
ENSG00000235245	0	AL360181.2	novel transcript	1	2	0.0298576	1.05046	1	0.0565741	0.75899	1	0.0684148	0.361204	0
ENSG00000235529	100506749	AGAP1-IT1	AGAP1 intronic transcript 1	1	2	0.024786	1.356	1	0.0452029	1.02379	1	0.0921801	0.442857	0
ENSG00000235636	729148	NUS1P1	NUS1 pseudogene 1	1	2	0.0237659	0.718471	1	0.0141217	1.15188	1	0.0152098	0.265682	0
ENSG00000237886	101928483	NALT1	NOTCH1 associated lncRNA in T cell acute lymphoblastic leukemia 1	1	2	0.0243095	1.00371	1	0.0628155	0.661479	1	0.0118555	-0.392325	0
ENSG00000238227	90120	TMEM250	transmembrane protein 250	1	2	0.0147417	1.05145	1	0.0177848	0.91882	1	0.0423765	-0.566187	0
ENSG00000238741	677767	SCARNA7	small Cajal body-specific RNA 7	1	2	0.0114171	1.10929	1	0.0655212	0.66986	1	0.0964718	-0.462706	0
ENSG00000239462	0	AC091212.1	novel transcript	1	2	0.080549	1.64645	1	0.0161576	2.37935	1	0.262122	0.271168	0
ENSG00000239948	106479357	RN7SL368P	RNA, 7SL, cytoplasmic 368, pseudogene	1	2	0.0466801	2.0887	1	0.00237121	1.22261	1	0.501506	0.0871537	0
ENSG00000241360	57026	PDXP	pyridoxal phosphatase	1	2	0.0296371	0.643216	1	0.0311918	1.05275	1	0.0345902	0.429309	0
ENSG00000242732	340526	RTL5	retrotransposon Gag like 5	1	2	0.0341905	0.926757	1	0.00448289	1.08664	1	0.0927126	0.348867	0
ENSG00000243650	106481148	RN7SL834P	RNA, 7SL, cytoplasmic 834, pseudogene	1	2	0.0105942	2.07744	1	0.0355713	1.51151	1	0.76198	-0.0278603	0
ENSG00000243742	113157	RPLP0P2	ribosomal protein lateral stalk subunit P0 pseudogene 2	1	2	0.00113938	3.7617	1	0.00556881	3.01674	1	0.0475415	-0.193439	0
ENSG00000244026	692099	FAM86DP	family with sequence similarity 86 member D, pseudogene	1	2	0.00944919	1.61051	1	0.0063945	1.03323	1	0.0222168	-0.262	0
ENSG00000244045	147007	TMEM199	transmembrane protein 199	1	2	0.0103753	0.95513	1	0.00859827	0.784796	1	0.00935339	-0.523571	0
ENSG00000246695	100506451	RASSF8-AS1	RASSF8 antisense RNA 1	1	2	0.0111452	1.56621	1	0.00372653	1.83197	1	0.21316	-0.112066	0
ENSG00000247596	11344	TWF2	twinfilin actin binding protein 2	1	2	0.0241489	0.791026	1	0.00885109	0.627197	1	0.31536	0.0582247	0
ENSG00000249673	317648	NOP14-AS1	NOP14 antisense RNA 1	1	2	0.00525282	0.984028	1	0.011355	0.592775	1	0.0696688	-0.121368	0
ENSG00000249915	10016	PDCD6	programmed cell death 6	1	2	0.00269637	0.854037	1	0.0537032	0.679899	1	0.0590016	-0.23885	0
ENSG00000249992	25907	TMEM158	transmembrane protein 158 (gene/pseudogene)	1	2	0.0368252	1.44848	1	0.00677382	2.12492	1	0.745856	0.048509	0
ENSG00000250318	0	AC003072.1	ribosomal protein L13a (RPL13A) pseudogene	1	2	0.073753	0.946364	1	0.0222366	1.42601	1	0.188741	0.152105	0
ENSG00000250510	27239	GPR162	G protein-coupled receptor 162	1	2	0.0269035	1.40291	1	0.00855469	1.30466	1	0.10321	-0.123172	0
ENSG00000251728	0	Y_RNA	NA	1	2	0.0565346	1.88963	1	0.0301321	1.5968	1	0.201995	0.594293	0
ENSG00000252213	109616975	SNORA74D	small nucleolar RNA, H/ACA box 74D	1	2	0.0504423	1.72128	1	0.0795877	1.94568	1	0.117824	-0.919928	0
ENSG00000253276	168455	CCDC71L	coiled-coil domain containing 71 like	1	2	0.00245554	2.01009	1	0.00142502	2.38285	1	0.0103483	-0.153969	0
ENSG00000255176	0	AP000941.1	novel transcript	1	2	0.0364843	1.5174	1	0.0122699	1.67081	1	0.190859	-0.338517	0
ENSG00000256940	105369340	PPP1R14B-AS1	PPP1R14B antisense RNA 1	1	2	0.0623779	0.967533	1	0.0108957	1.01472	1	0.06582	0.393463	0
ENSG00000257027	0	AC010186.3	novel transcript	1	2	0.0025838	2.05661	1	0.0357011	0.926857	1	0.0110007	-0.336737	0
ENSG00000257086	0	AP001453.3	novel transcript	1	2	0.0324794	0.819894	1	0.0349444	1.01696	1	0.10675	0.299669	0
ENSG00000257219	105369848	LNCOG	lncRNA osteogenesis associated	1	2	0.0175596	0.97718	1	0.0268483	1.8468	1	0.0384684	0.341354	0
ENSG00000257605	0	MYG1-AS1	novel transcript, antisense to PFDN5 and C12orf10	1	2	0.0453405	1.3089	1	0.0144818	1.78963	1	0.125795	-0.385971	0
ENSG00000257621	379025	PSMA3-AS1	PSMA3 antisense RNA 1	1	2	0.0173684	0.64196	1	0.0128569	0.852883	1	0.823378	0.00903898	0
ENSG00000258890	90799	CEP95	centrosomal protein 95	1	2	0.012967	0.839436	1	0.0181648	0.629722	1	0.133711	0.0592651	0
ENSG00000259518	101929690	LINC01583	long intergenic non-protein coding RNA 1583	1	2	0.00471189	2.45955	1	0.0138405	1.57139	1	0.0518758	0.0889247	0
ENSG00000259863	100287216	SH3RF3-AS1	SH3RF3 antisense RNA 1	1	2	0.0144054	1.46154	1	0.0102736	2.3868	1	0.0420633	0.499086	0
ENSG00000260267	0	AC026471.1	novel transcript, antisense to ARMC5	1	2	0.0315552	0.825051	1	0.0106725	0.653983	1	0.222873	0.058527	0
ENSG00000260565	100507321	ERVK13-1	endogenous retrovirus group K13 member 1	1	2	0.0446743	0.692456	1	0.0303851	0.713884	1	0.129928	-0.302372	0
ENSG00000260920	0	AL031985.3	novel transcript, sense overlapping with ZNF643	1	2	0.000402788	1.78862	1	0.0010898	2.42744	1	0.00280434	0.53745	0
ENSG00000261236	23246	BOP1	BOP1 ribosomal biogenesis factor	1	2	0.0434933	0.752147	1	0.00491867	1.08026	1	0.00610392	-0.543959	0
ENSG00000262001	84777	DLGAP1-AS2	DLGAP1 antisense RNA 2	1	2	0.0377376	0.93039	1	0.0246009	0.70479	1	0.0837161	0.282789	0
ENSG00000264379	0	SNORD39	NA	1	2	0.0407648	2.34457	1	0.0461164	2.7774	1	0.242268	0.370278	0
ENSG00000264425	100616117	MIR4653	microRNA 4653	1	2	0.0801272	1.20208	1	0.0271673	0.592482	1	0.0429411	0.218395	0
ENSG00000264522	56957	OTUD7B	OTU deubiquitinase 7B	1	2	0.00238744	0.679215	1	0.0153162	0.769483	1	0.0218948	0.431825	0
ENSG00000265452	100500850	MIR3682	microRNA 3682	1	2	0.0443679	1.19568	1	0.0306141	1.16196	1	0.0985588	0.369306	0
ENSG00000266124	100847028	MIR5587	microRNA 5587	1	2	0.0432331	1.88647	1	0.0505056	1.29426	1	0.11868	-0.809715	0
ENSG00000266338	284565	NBPF15	NBPF member 15	1	2	0.017401	0.597519	1	0.0263756	0.879767	1	0.510583	0.057818	0
ENSG00000266897	0	AC005546.1	novel transcript	1	2	0.0250582	0.938039	1	0.033304	1.3189	1	0.394504	-0.0893537	0
ENSG00000267197	0	AC011461.1	novel transcript, sense intronic with KEAP1	1	2	0.0172998	0.607354	1	0.0166725	1.01677	1	0.54521	-0.0397931	0
ENSG00000268858	0	AL118506.1	novel transcript, antisense to ABHD16B	1	2	0.0187625	1.61625	1	0.00236362	1.54102	1	0.806262	-0.0022017	0
ENSG00000269343	100293516	ZNF587B	zinc finger protein 587B	1	2	0.0621369	0.777708	1	0.0312082	0.736575	1	0.0495101	-0.0695245	0
ENSG00000269688	0	AC008982.2	novel transcript, sense intronic to HNRNPL	1	2	0.0122909	1.40581	1	0.0362544	1.07666	1	0.0761535	-0.400369	0
ENSG00000269858	112398	EGLN2	egl-9 family hypoxia inducible factor 2	1	2	0.0173047	0.844895	1	0.000224947	0.891443	1	0.0205965	-0.28031	0
ENSG00000269940	0	AL049840.5	novel transcript, sense intronic to KLC1	1	2	0.0137773	0.933562	1	0.0318799	0.89464	1	0.0545653	-0.464907	0
ENSG00000271943	0	AC098614.2	tropomyosin 4 (TPM4) pseudogene	1	2	0.0057073	1.45468	1	0.0362257	1.37136	1	0.0641988	-0.455248	0
ENSG00000272034	26822	SNORD14A	small nucleolar RNA, C/D box 14A	1	2	0.0138066	0.942706	1	0.0580492	1.75616	1	0.0522389	-0.543585	0
ENSG00000272333	9757	KMT2B	lysine methyltransferase 2B	1	2	0.0330921	0.664301	1	0.0425533	0.637076	1	0.172474	-0.186283	0
ENSG00000272341	0	AL137003.1	novel transcript	1	2	0.0321796	0.804308	1	0.00312368	0.644635	1	0.0862371	0.193171	0
ENSG00000272533	677811	SNORA28	small nucleolar RNA, H/ACA box 28	1	2	0.0790159	1.26749	1	0.0985129	0.713946	1	0.725694	-0.0966967	0
ENSG00000273311	25786	DGCR11	DiGeorge syndrome critical region gene 11	1	2	0.0281251	0.752704	1	0.0703282	0.597763	1	0.0933633	-0.445294	0
ENSG00000273350	0	AC004832.5	novel transcript, sense intronic to SEC14L2	1	2	0.0600416	0.72848	1	0.0198479	1.39764	1	0.0446403	0.314143	0
ENSG00000273568	0	AC131009.3	novel transcript, sense intronic to PUS1	1	2	0.0630787	0.755403	1	0.0902572	1.00637	1	0.463685	-0.205661	0
ENSG00000274425	0	AC114271.1	novel transcript, antisense to ICAM3	1	2	0.0254899	0.954473	1	0.0043458	1.21212	1	0.133342	0.202034	0
ENSG00000274963	106481086	RN7SL600P	RNA, 7SL, cytoplasmic 600, pseudogene	1	2	0.0228276	2.16815	1	0.0338652	1.5626	1	0.166507	-0.424041	0
ENSG00000274964	0	AC026356.1	novel transcript, sense intronic to BICD1	1	2	0.0467602	0.63906	1	0.0790677	0.749735	1	0.249525	-0.151229	0
ENSG00000275108	0	U7	NA	1	2	0.0564183	2.13004	1	0.0174765	3.48234	1	0.23368	0.588839	0
ENSG00000275180	0	AC048341.2	novel transcript	1	2	0.0526353	1.88381	1	0.00632816	1.53024	1	0.04829	0.266718	0
ENSG00000276404	102465502	MIR6835	microRNA 6835	1	2	0.0226272	1.81398	1	0.016055	3.21074	1	0.257296	0.128509	0
ENSG00000276740	0	AL445649.1	novel transcript, sense intronic to FAM155A	1	2	0.0324869	1.24692	1	0.0428169	1.84266	1	0.0923446	0.542842	0
ENSG00000277142	64493	LINC00235	long intergenic non-protein coding RNA 235	1	2	0.0387687	1.41209	1	0.0523296	0.742216	1	0.0643186	-0.562391	0
ENSG00000277161	284098	PIGW	phosphatidylinositol glycan anchor biosynthesis class W	1	2	0.0164968	1.23346	1	0.0136821	1.42475	1	0.529414	-0.065579	0
ENSG00000277590	102465835	MIR7845	microRNA 7845	1	2	0.0715143	1.02505	1	0.0495166	0.749651	1	0.1015	-0.754983	0
ENSG00000277945	0	AC107308.1	novel transcript, sense intronic to HMGA2	1	2	0.0501637	1.86129	1	0.022238	1.20682	1	0.141011	-0.350631	0
ENSG00000278876	0	AC145207.9	TEC	1	2	0.055554	0.889046	1	0.0984622	0.592996	1	0.192102	-0.328276	0
ENSG00000279265	0	AC000123.2	TEC	1	2	0.030674	1.12471	1	0.0569645	1.0964	1	0.167575	-0.418504	0
ENSG00000279520	0	AC093525.8	tec	1	2	0.00168931	0.98703	1	0.0724497	0.785988	1	0.0872017	-0.449246	0
ENSG00000279611	0	AC012313.10	novel transcript	1	2	0.0608398	0.873567	1	0.0678177	0.823328	1	0.0700206	-0.286469	0
ENSG00000279812	0	AC120057.4	TEC	1	2	0.0735378	1.51238	1	0.0583336	1.13965	1	0.430196	-0.258037	0
ENSG00000280088	0	AC126474.2	TEC	1	2	0.0535782	0.828386	1	0.0231145	1.05241	1	0.0392904	0.27612	0
ENSG00000280347	0	AC000123.3	TEC	1	2	0.0846014	0.764919	1	0.0297966	0.598192	1	0.131587	-0.275583	0
ENSG00000284154	100500853	MIR3605	#N/A	1	2	0.0387759	2.16376	1	0.0466503	2.09049	1	0.150798	-0.352388	0
ENSG00000284194	9997	SCO2	#N/A	1	2	0.0230783	1.10183	1	0.0160575	1.40203	1	0.0278867	-0.440899	0
ENSG00000285517	0	AC010198.2	#N/A	1	2	0.00764732	1.08533	1	0.00340932	0.813823	1	0.0200228	0.519101	0
ENSG00000285967	646719	NIPBL-DT	#N/A	1	2	0.0209974	0.837265	1	0.0216438	0.730943	1	0.549543	-0.0146247	0
ENSG00000287168	0	AL512625.3	#N/A	1	2	0.00371454	1.36798	1	0.027936	1.6024	1	0.0863264	0.477659	0
ENSG00000287263	643977	AC008875.3	#N/A	1	2	0.011618	0.892526	1	0.000489414	1.7446	1	0.0324434	-0.404707	0
ENSG00000001617	6405	SEMA3F	semaphorin 3F	1	3	0.0136613	0.775149	1	0.0185549	0.88735	1	0.0127177	-1.29383	-1
ENSG00000002549	51056	LAP3	leucine aminopeptidase 3	1	3	0.0102089	1.17453	1	0.00690032	0.919085	1	0.0138716	-0.697835	-1
ENSG00000005486	57414	RHBDD2	rhomboid domain containing 2	1	3	0.0186793	1.02268	1	0.00826623	1.52854	1	0.035223	-0.666321	-1
ENSG00000006118	54972	TMEM132A	transmembrane protein 132A	1	3	0.00115085	3.07069	1	0.00506369	1.5532	1	0.00623659	-1.62405	-1
ENSG00000007376	113000	RPUSD1	RNA pseudouridine synthase domain containing 1	1	3	0.0408791	1.0623	1	0.0207085	1.02095	1	0.0438536	-0.652355	-1
ENSG00000007384	64285	RHBDF1	rhomboid 5 homolog 1	1	3	0.00933186	2.99035	1	0.0016669	2.37708	1	0.00778282	-1.52488	-1
ENSG00000007944	29116	MYLIP	myosin regulatory light chain interacting protein	1	3	0.00484704	1.3535	1	0.0881408	0.691808	1	0.0553456	-0.988618	-1
ENSG00000010165	51603	EEF1AKNMT	eEF1A lysine and N-terminal methyltransferase	1	3	0.0090868	1.27937	1	0.00464732	0.826064	1	0.00863126	-0.580067	-1
ENSG00000010278	928	CD9	CD9 molecule	1	3	0.00611044	2.48126	1	0.0116256	1.39927	1	0.0152609	-1.249	-1
ENSG00000011009	11313	LYPLA2	lysophospholipase 2	1	3	0.00918878	1.72203	1	0.0135591	1.72623	1	0.00967766	-0.582207	-1
ENSG00000013275	5704	PSMC4	proteasome 26S subunit, ATPase 4	1	3	0.00317855	1.01138	1	0.0141955	0.84054	1	0.0134335	-0.893395	-1
ENSG00000023572	51022	GLRX2	glutaredoxin 2	1	3	0.00913797	1.25578	1	0.00691637	1.03226	1	0.00129781	-0.724974	-1
ENSG00000028137	7133	TNFRSF1B	TNF receptor superfamily member 1B	1	3	0.00124612	1.84285	1	0.00273183	1.50116	1	0.00234404	-1.81316	-1
ENSG00000028277	5452	POU2F2	POU class 2 homeobox 2	1	3	0.000602152	4.17843	1	0.000141673	2.13254	1	0.000622265	-2.49685	-1
ENSG00000030110	578	BAK1	BCL2 antagonist/killer 1	1	3	0.0491584	0.69236	1	0.069602	0.838075	1	0.020186	-0.765349	-1
ENSG00000033100	54480	CHPF2	chondroitin polymerizing factor 2	1	3	0.00940649	0.886943	1	0.0111149	1.12171	1	0.00913038	-1.08809	-1
ENSG00000039319	9765	ZFYVE16	zinc finger FYVE-type containing 16	1	3	0.0105314	1.52094	1	0.0027066	1.38995	1	0.0122084	-0.821951	-1
ENSG00000039650	11284	PNKP	polynucleotide kinase 3'-phosphatase	1	3	0.0114381	1.92733	1	0.00415102	1.96279	1	0.0110656	-1.13767	-1
ENSG00000040487	54896	SLC66A1	solute carrier family 66 member 1	1	3	0.0128613	2.0534	1	0.00731651	1.91751	1	0.0204765	-1.06351	-1
ENSG00000040633	79142	PHF23	PHD finger protein 23	1	3	0.00249612	1.16968	1	0.00648836	0.88804	1	0.00385727	-1.00258	-1
ENSG00000041802	55341	LSG1	large 60S subunit nuclear export GTPase 1	1	3	0.0130783	1.43142	1	0.00630187	0.998573	1	0.006494	-1.0443	-1
ENSG00000051382	5291	PIK3CB	phosphatidylinositol-4,5-bisphosphate 3-kinase catalytic subunit beta	1	3	0.0285625	1.18455	1	0.0421034	0.832441	1	0.0526964	-0.978053	-1
ENSG00000052749	23223	RRP12	ribosomal RNA processing 12 homolog	1	3	0.0164314	1.18962	1	0.0148712	0.784384	1	0.0278225	-0.632073	-1
ENSG00000054598	2296	FOXC1	forkhead box C1	1	3	0.00532481	1.02627	1	0.00447354	1.06315	1	0.00817519	-0.838294	-1
ENSG00000058600	55718	POLR3E	RNA polymerase III subunit E	1	3	0.00134898	1.1132	1	0.0119691	0.784035	1	0.00671418	-1.19677	-1
ENSG00000059377	6916	TBXAS1	thromboxane A synthase 1	1	3	0.00011415	1.67773	1	0.00177788	2.24271	1	0.00236627	-1.17872	-1
ENSG00000065457	23536	ADAT1	adenosine deaminase tRNA specific 1	1	3	0.00508716	0.902238	1	0.00992537	0.830745	1	0.00542431	-1.33608	-1
ENSG00000067064	3422	IDI1	isopentenyl-diphosphate delta isomerase 1	1	3	0.00905857	0.96472	1	0.00471595	0.738719	1	0.00522989	-1.48347	-1
ENSG00000068366	2182	ACSL4	acyl-CoA synthetase long chain family member 4	1	3	0.0090958	1.52869	1	0.0101842	0.607368	1	0.00741426	-1.8427	-1
ENSG00000070540	55062	WIPI1	WD repeat domain, phosphoinositide interacting 1	1	3	0.00948165	1.00952	1	0.00107922	1.01076	1	0.00027717	-1.57439	-1
ENSG00000070610	57704	GBA2	glucosylceramidase beta 2	1	3	0.0066355	1.27864	1	0.00805434	1.29585	1	0.019358	-0.585146	-1
ENSG00000071246	22846	VASH1	vasohibin 1	1	3	0.00372971	1.77398	1	0.00452717	0.954352	1	0.00790949	-0.834458	-1
ENSG00000072518	2011	MARK2	microtubule affinity regulating kinase 2	1	3	0.0131196	0.699957	1	0.0227846	0.621425	1	0.00597107	-0.819847	-1
ENSG00000073050	7515	XRCC1	X-ray repair cross complementing 1	1	3	0.00116143	2.25831	1	0.0461628	0.737209	1	0.015509	-1.29257	-1
ENSG00000073756	5743	PTGS2	prostaglandin-endoperoxide synthase 2	1	3	0.00205893	6.61621	1	0.0018795	3.29516	1	0.0104494	-1.14247	-1
ENSG00000074370	489	ATP2A3	ATPase sarcoplasmic/endoplasmic reticulum Ca2+ transporting 3	1	3	0.0010337	3.50079	1	0.00590438	1.46967	1	0.00360127	-1.73829	-1
ENSG00000076604	9618	TRAF4	TNF receptor associated factor 4	1	3	0.0239801	1.17068	1	0.0323717	1.16213	1	0.0243839	-0.728098	-1
ENSG00000077238	3566	IL4R	interleukin 4 receptor	1	3	0.00598765	2.42812	1	0.0041175	2.94581	1	0.0232188	-0.732588	-1
ENSG00000078124	55331	ACER3	alkaline ceramidase 3	1	3	0.0044686	1.1735	1	0.0161295	0.631263	1	0.00522777	-0.624597	-1
ENSG00000078269	8871	SYNJ2	synaptojanin 2	1	3	0.0279293	0.854828	1	0.0475494	0.60737	1	0.00513197	-1.19321	-1
ENSG00000081087	28962	OSTM1	osteoclastogenesis associated transmembrane protein 1	1	3	0.0217671	0.742962	1	0.0392406	0.69227	1	0.0114633	-1.11607	-1
ENSG00000081320	9262	STK17B	serine/threonine kinase 17b	1	3	0.00436433	1.34435	1	0.00166126	1.19662	1	0.00388673	-0.982819	-1
ENSG00000085117	3732	CD82	CD82 molecule	1	3	0.002241	2.83647	1	0.00196295	2.58478	1	0.00318807	-2.40052	-1
ENSG00000086061	3301	DNAJA1	DnaJ heat shock protein family (Hsp40) member A1	1	3	0.00979446	1.17617	1	0.00503229	1.06318	1	0.00846542	-1.1376	-1
ENSG00000088826	54498	SMOX	spermine oxidase	1	3	0.00434933	3.90467	1	0.0172156	2.11254	1	0.0430803	-1.20179	-1
ENSG00000089723	78990	OTUB2	OTU deubiquitinase, ubiquitin aldehyde binding 2	1	3	0.00335568	3.16635	1	0.0372034	0.94825	1	0.00059386	-2.37454	-1
ENSG00000090674	57192	MCOLN1	mucolipin 1	1	3	0.00728193	1.24314	1	0.0190097	0.840732	1	0.00065861	-0.631426	-1
ENSG00000091317	54918	CMTM6	CKLF like MARVEL transmembrane domain containing 6	1	3	0.015368	0.873285	1	0.00222301	1.52986	1	0.0143701	-0.856581	-1
ENSG00000095209	55151	TMEM38B	transmembrane protein 38B	1	3	0.0109067	1.56864	1	0.0232149	1.03004	1	0.014126	-1.23475	-1
ENSG00000095752	3589	IL11	interleukin 11	1	3	0.000359386	5.48603	1	0.000890967	3.44419	1	0.000411962	-2.13772	-1
ENSG00000097021	11332	ACOT7	acyl-CoA thioesterase 7	1	3	0.0112661	0.827117	1	0.0069079	0.915265	1	0.005491	-1.15278	-1
ENSG00000099625	255057	CBARP	CACN subunit beta associated regulatory protein	1	3	0.0142627	1.33506	1	0.0446927	0.728416	1	0.0139921	-1.40813	-1
ENSG00000099899	27037	TRMT2A	tRNA methyltransferase 2 homolog A	1	3	0.0439806	0.96957	1	0.00258327	0.716618	1	0.0446016	-0.733919	-1
ENSG00000100124	129138	ANKRD54	ankyrin repeat domain 54	1	3	0.0361912	1.0249	1	0.0106378	0.649593	1	0.00351994	-0.745026	-1
ENSG00000100228	9609	RAB36	RAB36, member RAS oncogene family	1	3	0.000828864	3.30117	1	0.00189591	1.53059	1	0.00605099	-1.15939	-1
ENSG00000100612	51635	DHRS7	dehydrogenase/reductase 7	1	3	0.000449012	1.52102	1	0.0181136	1.19045	1	0.0327059	-0.580673	-1
ENSG00000100647	9766	SUSD6	sushi domain containing 6	1	3	0.00558821	2.44252	1	0.00657692	2.02884	1	0.0144753	-1.55525	-1
ENSG00000100731	22990	PCNX1	pecanex 1	1	3	0.00874894	3.59488	1	0.00986062	1.76217	1	0.00684845	-1.89601	-1
ENSG00000101439	1471	CST3	cystatin C	1	3	0.0026445	1.82417	1	0.00381316	1.22055	1	0.0048398	-0.981112	-1
ENSG00000101577	9663	LPIN2	lipin 2	1	3	0.00820589	1.35159	1	0.0244952	0.727517	1	0.0195658	-0.893267	-1
ENSG00000102743	10166	SLC25A15	solute carrier family 25 member 15	1	3	0.00605893	2.54547	1	0.000410374	1.02194	1	0.000163373	-1.80485	-1
ENSG00000102804	8848	TSC22D1	TSC22 domain family member 1	1	3	0.00312809	2.5289	1	0.00490438	0.965116	1	0.0009229	-1.95971	-1
ENSG00000103249	1186	CLCN7	chloride voltage-gated channel 7	1	3	0.0101104	1.6627	1	0.0390124	0.750991	1	0.0116334	-1.80356	-1
ENSG00000103876	2184	FAH	fumarylacetoacetate hydrolase	1	3	0.00224682	1.43116	1	0.00142396	1.4536	1	0.00120766	-0.662049	-1
ENSG00000104142	57617	VPS18	VPS18 core subunit of CORVET and HOPS complexes	1	3	0.00539255	0.698667	1	0.0429416	0.705685	1	0.00738973	-0.858925	-1
ENSG00000104321	8989	TRPA1	transient receptor potential cation channel subfamily A member 1	1	3	0.0114749	1.38865	1	0.00417943	1.14988	1	0.00590314	-0.825737	-1
ENSG00000104447	7227	TRPS1	transcriptional repressor GATA binding 1	1	3	0.0151796	1.54477	1	0.0146094	0.856762	1	4.05787e-05	-0.735326	-1
ENSG00000104524	65263	PYCR3	pyrroline-5-carboxylate reductase 3	1	3	0.0557692	0.905927	1	0.0206325	1.12204	1	0.039648	-0.769462	-1
ENSG00000105379	2109	ETFB	electron transfer flavoprotein subunit beta	1	3	0.0184144	0.780081	1	0.0317581	0.685827	1	0.0245589	-0.63559	-1
ENSG00000105447	83743	GRWD1	glutamate rich WD repeat containing 1	1	3	0.00809915	0.882329	1	0.0246443	0.940278	1	0.0137232	-0.658875	-1
ENSG00000105617	79165	LENG1	leukocyte receptor cluster member 1	1	3	0.014506	0.896198	1	0.0866844	0.595739	1	0.0735748	-0.707838	-1
ENSG00000105722	2077	ERF	ETS2 repressor factor	1	3	0.016663	1.30844	1	0.0149158	0.750248	1	0.0320131	-0.616695	-1
ENSG00000105726	57130	ATP13A1	ATPase 13A1	1	3	0.00574083	0.94458	1	0.0306824	0.62179	1	0.0118896	-0.701676	-1
ENSG00000105835	10135	NAMPT	nicotinamide phosphoribosyltransferase	1	3	0.000588744	4.2097	1	0.00623236	1.32082	1	0.00302541	-1.67651	-1
ENSG00000106537	27075	TSPAN13	tetraspanin 13	1	3	0.0049693	2.30177	1	0.0182731	1.75007	1	0.0109476	-1.38693	-1
ENSG00000106665	7461	CLIP2	CAP-Gly domain containing linker protein 2	1	3	0.0196152	1.07412	1	0.0110415	1.03834	1	0.0412449	-0.654631	-1
ENSG00000106683	3984	LIMK1	LIM domain kinase 1	1	3	0.000760056	2.59771	1	0.00225229	2.45614	1	0.000843684	-1.1197	-1
ENSG00000106976	1759	DNM1	dynamin 1	1	3	0.00297301	1.53197	1	0.00710939	1.65856	1	0.0142613	-0.654669	-1
ENSG00000107372	7763	ZFAND5	zinc finger AN1-type containing 5	1	3	0.0114956	1.33251	1	0.010073	1.39403	1	0.00866531	-1.16077	-1
ENSG00000107789	9562	MINPP1	multiple inositol-polyphosphate phosphatase 1	1	3	0.00835674	1.01243	1	0.0125954	0.831052	1	0.0105699	-1.09139	-1
ENSG00000108654	1655	DDX5	DEAD-box helicase 5	1	3	0.0395556	0.580718	1	0.00129181	1.62106	1	0.00256034	-0.614995	-1
ENSG00000108946	5573	PRKAR1A	protein kinase cAMP-dependent type I regulatory subunit alpha	1	3	0.00400335	1.56414	1	0.00478405	0.959405	1	0.0136651	-0.629644	-1
ENSG00000109689	57620	STIM2	stromal interaction molecule 2	1	3	0.00791249	1.07092	1	0.00513197	0.681394	1	0.00375335	-1.43811	-1
ENSG00000110031	9404	LPXN	leupaxin	1	3	0.00246471	2.1586	1	0.00437138	2.13306	1	0.0103899	-0.735974	-1
ENSG00000110046	23130	ATG2A	autophagy related 2A	1	3	0.00716514	2.28139	1	0.0128619	1.57398	1	0.0212648	-0.801197	-1
ENSG00000110697	9600	PITPNM1	phosphatidylinositol transfer protein membrane associated 1	1	3	0.0143232	1.53023	1	0.00450441	1.44311	1	0.0102399	-1.17374	-1
ENSG00000111252	10019	SH2B3	SH2B adaptor protein 3	1	3	8.64502e-05	3.57425	1	0.00453987	3.53065	1	0.00500741	-0.918596	-1
ENSG00000111266	80824	DUSP16	dual specificity phosphatase 16	1	3	0.000946718	2.34	1	0.00131563	1.24536	1	0.00310145	-0.721285	-1
ENSG00000112406	51696	HECA	hdc homolog, cell cycle regulator	1	3	0.00450741	2.86966	1	0.00372301	1.14858	1	0.00389732	-1.38673	-1
ENSG00000113161	3156	HMGCR	3-hydroxy-3-methylglutaryl-CoA reductase	1	3	0.00774012	1.29558	1	0.00617925	0.79665	1	0.0120429	-1.04137	-1
ENSG00000113716	22993	HMGXB3	HMG-box containing 3	1	3	0.00623571	1.94308	1	0.000549753	2.01076	1	0.00145448	-0.620723	-1
ENSG00000114767	9136	RRP9	ribosomal RNA processing 9, U3 small nucleolar RNA binding protein	1	3	0.0290519	1.21244	1	0.00880558	1.02111	1	0.020476	-0.680285	-1
ENSG00000114999	150465	TTL	tubulin tyrosine ligase	1	3	0.00225106	1.84026	1	0.00143207	2.11078	1	0.000492766	-0.941749	-1
ENSG00000115008	3552	IL1A	interleukin 1 alpha	1	3	7.42766e-05	6.33535	1	0.000766231	5.32956	1	0.000745413	-1.68041	-1
ENSG00000115241	5496	PPM1G	protein phosphatase, Mg2+/Mn2+ dependent 1G	1	3	0.00667713	1.07357	1	0.0156528	0.845338	1	0.00913479	-0.747928	-1
ENSG00000115520	80219	COQ10B	coenzyme Q10B	1	3	0.0066198	0.830337	1	0.00423324	1.42665	1	0.00500917	-1.01539	-1
ENSG00000115756	3241	HPCAL1	hippocalcin like 1	1	3	0.000521877	3.05301	1	6.40438e-05	3.43641	1	0.000331863	-1.26719	-1
ENSG00000115758	4953	ODC1	ornithine decarboxylase 1	1	3	0.000502117	3.7394	1	0.00396595	1.46468	1	0.000915138	-2.89779	-1
ENSG00000115762	55041	PLEKHB2	pleckstrin homology domain containing B2	1	3	0.0115819	0.807317	1	0.0102828	0.623354	1	0.0152971	-0.622121	-1
ENSG00000115825	23683	PRKD3	protein kinase D3	1	3	0.00507428	2.57415	1	0.000525229	1.11618	1	0.0102832	-1.6058	-1
ENSG00000116406	80267	EDEM3	ER degradation enhancing alpha-mannosidase like protein 3	1	3	0.0116071	1.20741	1	0.00396401	1.41688	1	0.00039379	-1.45942	-1
ENSG00000116741	5997	RGS2	regulator of G protein signaling 2	1	3	0.0131307	1.891	1	0.00695783	2.03146	1	0.013157	-0.833355	-1
ENSG00000116871	55700	MAP7D1	MAP7 domain containing 1	1	3	0.056451	0.708771	1	0.0246733	0.644891	1	0.0243338	-1.30975	-1
ENSG00000116991	57568	SIPA1L2	signal induced proliferation associated 1 like 2	1	3	0.00733345	1.62068	1	0.0486094	0.64266	1	0.015168	-1.66427	-1
ENSG00000117410	533	ATP6V0B	ATPase H+ transporting V0 subunit b	1	3	0.00720413	1.33757	1	0.0060277	1.33315	1	0.0107691	-1.10294	-1
ENSG00000117479	10560	SLC19A2	solute carrier family 19 member 2	1	3	0.00492325	1.87063	1	0.0110547	0.963874	1	0.00346048	-1.32766	-1
ENSG00000118402	6785	ELOVL4	ELOVL fatty acid elongase 4	1	3	0.00874947	1.98421	1	0.0182768	1.1958	1	0.0111221	-1.47679	-1
ENSG00000119669	64207	IRF2BPL	interferon regulatory factor 2 binding protein like	1	3	0.0072066	1.00978	1	0.0104866	1.13188	1	0.00959721	-0.965338	-1
ENSG00000119682	9870	AREL1	apoptosis resistant E3 ubiquitin protein ligase 1	1	3	0.0140933	0.587407	1	0.034633	0.708426	1	0.0255369	-0.792181	-1
ENSG00000119900	79627	OGFRL1	opioid growth factor receptor like 1	1	3	0.00376905	2.61199	1	0.00353229	0.681763	1	0.00531704	-1.99617	-1
ENSG00000120318	64411	ARAP3	ArfGAP with RhoGAP domain, ankyrin repeat and PH domain 3	1	3	0.00471842	2.02753	1	0.00627999	1.55179	1	0.0228513	-0.585428	-1
ENSG00000120694	10808	HSPH1	heat shock protein family H (Hsp110) member 1	1	3	0.0105753	1.55135	1	0.00466549	2.13358	1	0.0161704	-1.38185	-1
ENSG00000122641	3624	INHBA	inhibin subunit beta A	1	3	0.00179076	3.45159	1	0.00298324	2.2097	1	0.00709368	-0.773807	-1
ENSG00000122861	5328	PLAU	plasminogen activator, urokinase	1	3	0.00682992	3.06824	1	0.00124947	4.74215	1	0.00749188	-2.23864	-1
ENSG00000123545	29078	NDUFAF4	NADH:ubiquinone oxidoreductase complex assembly factor 4	1	3	0.036596	0.759893	1	0.00663091	1.21564	1	0.0144513	-0.657966	-1
ENSG00000123643	206358	SLC36A1	solute carrier family 36 member 1	1	3	0.0169481	0.72965	1	0.000133733	1.15166	1	0.0150406	-0.65924	-1
ENSG00000123892	23682	RAB38	RAB38, member RAS oncogene family	1	3	0.000473712	2.56166	1	0.0444384	0.706157	1	0.0043698	-1.2062	-1
ENSG00000124191	84969	TOX2	TOX high mobility group box family member 2	1	3	0.0254243	1.43382	1	0.0315004	0.991267	1	0.0722998	-0.586116	-1
ENSG00000124225	56937	PMEPA1	prostate transmembrane protein, androgen induced 1	1	3	0.00119954	4.17178	1	0.000742237	3.34419	1	0.00317167	-1.33351	-1
ENSG00000124541	88745	RRP36	ribosomal RNA processing 36	1	3	0.00100194	0.613211	1	0.011705	0.916184	1	0.00155646	-0.991295	-1
ENSG00000125266	1948	EFNB2	ephrin B2	1	3	0.00145766	3.18339	1	0.00857886	2.49835	1	0.0165565	-1.38074	-1
ENSG00000125538	3553	IL1B	interleukin 1 beta	1	3	0.0023338	8.80098	1	0.000190896	8.34339	1	0.010868	-1.79205	-1
ENSG00000125827	56255	TMX4	thioredoxin related transmembrane protein 4	1	3	0.000112562	4.98024	1	0.0165909	0.713996	1	0.0005247	-3.94696	-1
ENSG00000125845	650	BMP2	bone morphogenetic protein 2	1	3	0.00246418	5.93556	1	0.00377505	4.25675	1	0.00654605	-3.02743	-1
ENSG00000125848	23767	FLRT3	fibronectin leucine rich transmembrane protein 3	1	3	0.00172724	4.46368	1	0.00362456	3.93699	1	0.0154107	-0.729913	-1
ENSG00000126391	83786	FRMD8	FERM domain containing 8	1	3	0.00446524	1.51763	1	0.0057927	1.27489	1	0.00712474	-0.932198	-1
ENSG00000126456	3661	IRF3	interferon regulatory factor 3	1	3	0.0111032	1.27611	1	0.0143876	0.629154	1	0.0117622	-0.845802	-1
ENSG00000128274	53947	A4GALT	alpha 1,4-galactosyltransferase (P blood group)	1	3	0.012136	1.36416	1	0.0167535	1.24489	1	0.0225595	-1.00829	-1
ENSG00000128340	5880	RAC2	Rac family small GTPase 2	1	3	0.000178546	3.12814	1	0.00449647	1.51203	1	0.00500865	-1.33059	-1
ENSG00000128342	3976	LIF	LIF interleukin 6 family cytokine	1	3	0.00463779	3.46891	1	0.00340808	3.20857	1	0.00575071	-2.61552	-1
ENSG00000128482	7732	RNF112	ring finger protein 112	1	3	0.0134637	2.27715	1	0.0314989	0.600086	1	0.00116814	-2.14676	-1
ENSG00000129925	58986	PGAP6	post-glycosylphosphatidylinositol attachment to proteins 6	1	3	0.0292431	0.864089	1	0.0133444	1.49133	1	0.0249718	-0.90727	-1
ENSG00000130066	6303	SAT1	spermidine/spermine N1-acetyltransferase 1	1	3	0.00765349	2.48643	1	0.00495007	2.6537	1	0.00874012	-1.16988	-1
ENSG00000130119	54552	GNL3L	G protein nucleolar 3 like	1	3	0.0381097	0.947196	1	0.0190281	0.641546	1	0.0218035	-0.872839	-1
ENSG00000130513	9518	GDF15	growth differentiation factor 15	1	3	0.00207922	3.25578	1	0.00953829	0.954524	1	0.00132692	-4.52386	-1
ENSG00000130725	9040	UBE2M	ubiquitin conjugating enzyme E2 M	1	3	0.0178964	1.27371	1	0.0217546	0.800564	1	0.0428982	-0.655939	-1
ENSG00000130758	4294	MAP3K10	mitogen-activated protein kinase kinase kinase 10	1	3	0.0253786	0.904272	1	0.0180766	0.611395	1	0.031958	-0.727834	-1
ENSG00000130775	9473	THEMIS2	thymocyte selection associated family member 2	1	3	0.00202064	1.97984	1	0.00437968	1.57479	1	0.00616002	-1.01601	-1
ENSG00000131669	4814	NINJ1	ninjurin 1	1	3	0.000751059	2.02547	1	0.0111521	1.97562	1	0.0181209	-1.15314	-1
ENSG00000132003	65249	ZSWIM4	zinc finger SWIM-type containing 4	1	3	0.00120854	1.57657	1	0.017079	1.43984	1	0.0121378	-1.00191	-1
ENSG00000132153	22907	DHX30	DExH-box helicase 30	1	3	0.012413	0.895157	1	0.0126985	0.722014	1	0.0210265	-0.641677	-1
ENSG00000132768	1802	DPH2	diphthamide biosynthesis 2	1	3	0.00707657	1.01709	1	0.033157	0.917262	1	0.0230677	-0.677447	-1
ENSG00000133275	1455	CSNK1G2	casein kinase 1 gamma 2	1	3	0.0190695	1.09467	1	0.00669442	0.929349	1	0.0115633	-0.759361	-1
ENSG00000134070	3656	IRAK2	interleukin 1 receptor associated kinase 2	1	3	0.00202611	3.18132	1	0.00883416	2.77007	1	0.00304834	-1.57788	-1
ENSG00000134775	80206	FHOD3	formin homology 2 domain containing 3	1	3	0.00596224	1.21997	1	0.000275229	1.13992	1	0.00195501	-0.689038	-1
ENSG00000135469	93058	COQ10A	coenzyme Q10A	1	3	0.00651147	1.38765	1	0.0538809	0.838019	1	0.0330042	-1.14865	-1
ENSG00000135503	91	ACVR1B	activin A receptor type 1B	1	3	0.00558239	1.81644	1	0.00766461	1.12237	1	0.0228363	-0.787076	-1
ENSG00000135596	64780	MICAL1	microtubule associated monooxygenase, calponin and LIM domain containing 1	1	3	0.0398954	0.590677	1	0.00954323	0.791253	1	0.0266572	-0.659051	-1
ENSG00000135637	84865	CCDC142	coiled-coil domain containing 142	1	3	0.0253269	1.11545	1	0.0256157	0.612982	1	0.0309794	-0.793189	-1
ENSG00000135698	10200	MPHOSPH6	M-phase phosphoprotein 6	1	3	0.00648271	2.23984	1	0.0058331	2.23237	1	0.0148423	-1.09544	-1
ENSG00000135821	2752	GLUL	glutamate-ammonia ligase	1	3	0.0034356	1.22182	1	0.0163433	0.580736	1	0.00642131	-0.745741	-1
ENSG00000135956	55654	TMEM127	transmembrane protein 127	1	3	0.00563215	0.982593	1	0.0413022	0.620694	1	0.00937438	-1.03414	-1
ENSG00000136378	11173	ADAMTS7	ADAM metallopeptidase with thrombospondin type 1 motif 7	1	3	0.00520713	1.69955	1	0.000729358	1.03176	1	0.00327876	-2.30246	-1
ENSG00000136444	55316	RSAD1	radical S-adenosyl methionine domain containing 1	1	3	0.0637137	0.694175	1	0.0321203	0.652892	1	0.0254615	-0.73554	-1
ENSG00000136603	6498	SKIL	SKI like proto-oncogene	1	3	0.0210644	1.83841	1	0.0238518	0.817346	1	0.0395928	-1.14598	-1
ENSG00000136802	56262	LRRC8A	leucine rich repeat containing 8 VRAC subunit A	1	3	0.00202011	1.64131	1	0.0098361	1.97998	1	0.0271627	-0.766691	-1
ENSG00000136827	1861	TOR1A	torsin family 1 member A	1	3	0.00128511	0.824168	1	0.0144245	0.914663	1	0.0201498	-0.654531	-1
ENSG00000136868	1317	SLC31A1	solute carrier family 31 member 1	1	3	0.00920977	1.13916	1	0.0058548	1.21762	1	0.0194453	-0.709561	-1
ENSG00000137094	25822	DNAJB5	DnaJ heat shock protein family (Hsp40) member B5	1	3	0.00167219	2.47754	1	0.00113991	2.68522	1	0.0101854	-0.886124	-1
ENSG00000137331	8870	IER3	immediate early response 3	1	3	0.00174753	3.32763	1	0.0295907	0.972981	1	0.00844531	-1.24801	-1
ENSG00000137494	338699	ANKRD42	ankyrin repeat domain 42	1	3	0.000399435	1.35411	1	0.0255783	0.917955	1	0.0100789	-0.8403	-1
ENSG00000137809	22801	ITGA11	integrin subunit alpha 11	1	3	0.0139624	1.76784	1	0.0404982	0.663959	1	0.00467996	-1.03265	-1
ENSG00000138623	8482	SEMA7A	semaphorin 7A (John Milton Hagen blood group)	1	3	0.0017927	3.25432	1	0.00518137	1.87386	1	0.0213402	-0.646995	-1
ENSG00000139567	94	ACVRL1	activin A receptor like type 1	1	3	0.00229464	3.39418	1	0.00445907	1.11769	1	0.00184757	-2.8716	-1
ENSG00000139946	57161	PELI2	pellino E3 ubiquitin protein ligase family member 2	1	3	0.017452	0.615455	1	0.0313333	0.62343	1	0.020112	-0.926774	-1
ENSG00000140853	84166	NLRC5	NLR family CARD domain containing 5	1	3	0.0261704	0.748674	1	0.0365889	0.624094	1	0.00381828	-1.32481	-1
ENSG00000140931	123920	CMTM3	CKLF like MARVEL transmembrane domain containing 3	1	3	0.005744	2.41431	1	0.00374912	1.49601	1	0.0177292	-1.1206	-1
ENSG00000141425	55197	RPRD1A	regulation of nuclear pre-mRNA domain containing 1A	1	3	0.00652823	1.30144	1	0.00460586	0.756534	1	0.00401129	-0.877189	-1
ENSG00000141452	29919	RMC1	regulator of MON1-CCZ1	1	3	0.0198516	0.899801	1	0.00983557	1.05076	1	0.0161925	-1.07628	-1
ENSG00000141469	6563	SLC14A1	solute carrier family 14 member 1 (Kidd blood group)	1	3	0.00667819	1.06421	1	0.000720889	2.49862	1	0.00410303	-1.01808	-1
ENSG00000143479	8444	DYRK3	dual specificity tyrosine phosphorylation regulated kinase 3	1	3	0.00265296	1.71614	1	0.00924541	0.761775	1	0.00609033	-1.064	-1
ENSG00000144136	6574	SLC20A1	solute carrier family 20 member 1	1	3	0.000679605	4.42106	1	0.000278582	6.42058	1	5.29287e-06	-0.673235	-1
ENSG00000144802	64332	NFKBIZ	NFKB inhibitor zeta	1	3	0.00438532	2.38708	1	0.0479792	0.606352	1	0.013666	-1.14215	-1
ENSG00000145214	1609	DGKQ	diacylglycerol kinase theta	1	3	0.0506948	0.612898	1	0.0144529	0.585519	1	0.0312553	-0.622728	-1
ENSG00000146063	90933	TRIM41	tripartite motif containing 41	1	3	0.0204174	1.02245	1	0.0177458	0.603758	1	0.0147906	-0.629951	-1
ENSG00000146197	222663	SCUBE3	signal peptide, CUB domain and EGF like domain containing 3	1	3	0.0116161	2.65983	1	0.00621613	2.17202	1	0.00410215	-2.35163	-1
ENSG00000146232	4794	NFKBIE	NFKB inhibitor epsilon	1	3	0.0202018	0.901153	1	0.040416	0.887652	1	0.0187631	-0.812005	-1
ENSG00000146757	168374	ZNF92	zinc finger protein 92	1	3	0.00174206	1.68708	1	0.0240005	1.05926	1	0.00861044	-0.672448	-1
ENSG00000146826	55262	MAP11	microtubule associated protein 11	1	3	0.0119548	1.60116	1	0.0187154	1.18618	1	0.0101685	-1.607	-1
ENSG00000147454	51312	SLC25A37	solute carrier family 25 member 37	1	3	0.00321171	3.48678	1	0.00951464	1.66744	1	0.00533821	-2.50514	-1
ENSG00000147883	1030	CDKN2B	cyclin dependent kinase inhibitor 2B	1	3	0.00014379	5.87515	1	0.000600035	4.52581	1	0.00090561	-2.66036	-1
ENSG00000148841	85450	ITPRIP	inositol 1,4,5-trisphosphate receptor interacting protein	1	3	0.00537985	1.99103	1	0.00444266	1.42562	1	0.0154199	-0.620613	-1
ENSG00000149115	85456	TNKS1BP1	tankyrase 1 binding protein 1	1	3	0.000796754	1.60557	1	0.0145602	0.802864	1	0.0032403	-0.857736	-1
ENSG00000149289	85463	ZC3H12C	zinc finger CCCH-type containing 12C	1	3	0.00938479	1.73775	1	0.00625794	1.54934	1	0.0311134	-0.603255	-1
ENSG00000149480	9219	MTA2	metastasis associated 1 family member 2	1	3	0.0195124	0.661923	1	0.00530099	1.14952	1	0.00969478	-0.721521	-1
ENSG00000149499	256364	EML3	EMAP like 3	1	3	0.0300051	1.25229	1	0.0117027	1.03363	1	0.0179876	-0.861287	-1
ENSG00000151498	27034	ACAD8	acyl-CoA dehydrogenase family member 8	1	3	0.0180307	0.949165	1	0.0107918	0.896752	1	0.00186097	-0.815554	-1
ENSG00000151689	3628	INPP1	inositol polyphosphate-1-phosphatase	1	3	0.00274488	1.14573	1	0.00783363	1.61042	1	0.00916478	-0.8025	-1
ENSG00000151726	2180	ACSL1	acyl-CoA synthetase long chain family member 1	1	3	0.0174834	1.25512	1	0.0107648	1.17667	1	0.0418737	-0.717313	-1
ENSG00000152464	10557	RPP38	ribonuclease P/MRP subunit p38	1	3	0.0275702	0.583707	1	0.0362177	0.58335	1	0.033201	-0.580419	-1
ENSG00000153132	1047	CLGN	calmegin	1	3	0.00457304	3.11565	1	0.0148098	1.2443	1	0.0222278	-0.600369	-1
ENSG00000153443	124402	UBALD1	UBA like domain containing 1	1	3	0.0117526	1.37541	1	0.00753705	1.21604	1	0.0180741	-1.12198	-1
ENSG00000154864	63895	PIEZO2	piezo type mechanosensitive ion channel component 2	1	3	0.0238185	1.58917	1	0.024817	1.02535	1	0.0179181	-1.50587	-1
ENSG00000155850	1836	SLC26A2	solute carrier family 26 member 2	1	3	0.010823	1.12042	1	0.0036168	1.25056	1	0.00148147	-1.38902	-1
ENSG00000156804	114907	FBXO32	F-box protein 32	1	3	0.00618278	1.76561	1	0.00506651	1.88091	1	0.00473112	-0.720284	-1
ENSG00000157168	3084	NRG1	neuregulin 1	1	3	0.0071976	4.14505	1	0.00306934	1.41984	1	0.0109813	-3.09091	-1
ENSG00000157227	4323	MMP14	matrix metallopeptidase 14	1	3	0.00584421	2.56667	1	0.00359192	2.6596	1	0.0408617	-0.736237	-1
ENSG00000157240	8321	FZD1	frizzled class receptor 1	1	3	0.00423412	2.0273	1	0.00952029	0.839169	1	0.0117219	-0.586635	-1
ENSG00000157350	6483	ST3GAL2	ST3 beta-galactoside alpha-2,3-sialyltransferase 2	1	3	0.00145254	1.31388	1	0.0120947	1.43843	1	0.00608874	-0.606874	-1
ENSG00000158717	115992	RNF166	ring finger protein 166	1	3	0.00245325	1.24687	1	0.0104296	0.962921	1	0.0113477	-1.02206	-1
ENSG00000158773	7391	USF1	upstream transcription factor 1	1	3	0.00215649	1.77446	1	0.0086115	1.22032	1	0.00913532	-0.908149	-1
ENSG00000158793	4817	NIT1	nitrilase 1	1	3	0.0103294	1.4325	1	0.0143454	0.749383	1	0.0256313	-0.643907	-1
ENSG00000158882	84134	TOMM40L	translocase of outer mitochondrial membrane 40 like	1	3	0.00990526	0.649105	1	0.00547265	0.725606	1	0.005503	-0.860689	-1
ENSG00000158941	57805	CCAR2	cell cycle and apoptosis regulator 2	1	3	0.0135815	0.837095	1	0.00661627	0.957256	1	0.0114617	-0.652348	-1
ENSG00000159720	9114	ATP6V0D1	ATPase H+ transporting V0 subunit d1	1	3	0.0162518	0.677548	1	0.00362615	0.760801	1	0.01178	-0.882035	-1
ENSG00000159784	9715	FAM131B	family with sequence similarity 131 member B	1	3	0.00260462	1.98916	1	0.0342011	0.649787	1	0.0165983	-1.12921	-1
ENSG00000160072	83858	ATAD3B	ATPase family AAA domain containing 3B	1	3	0.00941126	0.890378	1	0.00299735	1.04675	1	0.0089656	-0.624952	-1
ENSG00000160193	10785	WDR4	WD repeat domain 4	1	3	0.043614	0.710684	1	0.0822062	0.785608	1	0.0535464	-0.716879	-1
ENSG00000160218	7109	TRAPPC10	trafficking protein particle complex 10	1	3	0.0129386	0.79009	1	0.0114106	0.582262	1	0.00378881	-1.00291	-1
ENSG00000160326	11182	SLC2A6	solute carrier family 2 member 6	1	3	0.0181274	1.42776	1	0.000641143	1.15525	1	0.00659263	-1.23552	-1
ENSG00000160606	116238	TLCD1	TLC domain containing 1	1	3	0.0372369	0.683252	1	0.0182475	0.698524	1	0.00683204	-0.644293	-1
ENSG00000160688	80308	FLAD1	flavin adenine dinucleotide synthetase 1	1	3	0.00128405	0.962019	1	0.0342809	0.814057	1	0.000182075	-0.980268	-1
ENSG00000160785	9673	SLC25A44	solute carrier family 25 member 44	1	3	0.043732	0.813822	1	0.0365616	0.818376	1	0.0207339	-1.20145	-1
ENSG00000160818	54865	GPATCH4	G-patch domain containing 4	1	3	0.0297299	0.732166	1	0.0260037	0.957118	1	0.00390861	-0.785742	-1
ENSG00000161011	8878	SQSTM1	sequestosome 1	1	3	0.00541373	1.41435	1	0.0132507	0.851452	1	0.00672795	-1.63294	-1
ENSG00000161036	222229	LRWD1	leucine rich repeats and WD repeat domain containing 1	1	3	0.0105092	1.72393	1	0.00621683	1.90131	1	0.0225722	-0.739634	-1
ENSG00000162227	10629	TAF6L	TATA-box binding protein associated factor 6 like	1	3	0.0281233	1.11418	1	0.020621	1.02705	1	0.0280868	-0.664809	-1
ENSG00000162889	9261	MAPKAPK2	MAPK activated protein kinase 2	1	3	9.38603e-05	0.58614	1	0.00531898	0.761669	1	0.000370148	-0.821432	-1
ENSG00000163291	152559	PAQR3	progestin and adipoQ receptor family member 3	1	3	0.0181189	0.751082	1	0.0186314	0.904065	1	0.0249397	-0.774387	-1
ENSG00000163814	64866	CDCP1	CUB domain containing protein 1	1	3	0.00269337	2.02649	1	0.00174259	0.751367	1	0.00212985	-1.16919	-1
ENSG00000163874	80149	ZC3H12A	zinc finger CCCH-type containing 12A	1	3	0.00408275	4.3123	1	0.0104407	1.49949	1	0.0030374	-2.85909	-1
ENSG00000164050	5364	PLXNB1	plexin B1	1	3	0.00444689	0.674791	1	0.0264739	0.811557	1	0.0187895	-0.917096	-1
ENSG00000164251	2150	F2RL1	F2R like trypsin receptor 1	1	3	3.93437e-05	4.65668	1	0.0031168	2.88411	1	0.00222689	-2.05126	-1
ENSG00000164283	11082	ESM1	endothelial cell specific molecule 1	1	3	1.57022e-05	6.04051	1	0.00312456	2.60798	1	0.000941602	-2.62307	-1
ENSG00000164465	285761	DCBLD1	discoidin, CUB and LCCL domain containing 1	1	3	0.00266637	2.26226	1	0.0107809	1.20465	1	0.000455716	-1.58505	-1
ENSG00000164733	1508	CTSB	cathepsin B	1	3	0.023726	0.801502	1	0.00236062	1.15072	1	0.0322968	-0.618737	-1
ENSG00000164761	4982	TNFRSF11B	TNF receptor superfamily member 11b	1	3	0.00368507	1.91822	1	0.00356722	2.71431	1	0.00244513	-2.8885	-1
ENSG00000164823	734	OSGIN2	oxidative stress induced growth inhibitor family member 2	1	3	0.0043945	2.35196	1	0.00537615	1.97754	1	0.00351217	-1.38663	-1
ENSG00000164877	79778	MICALL2	MICAL like 2	1	3	0.015159	1.36261	1	0.00383257	1.58413	1	0.00137509	-1.44115	-1
ENSG00000165355	254170	FBXO33	F-box protein 33	1	3	0.00454817	0.988813	1	0.00223306	0.959242	1	0.00238691	-0.637673	-1
ENSG00000165650	118987	PDZD8	PDZ domain containing 8	1	3	0.0176583	1.06409	1	0.014431	1.00191	1	0.0263015	-0.594324	-1
ENSG00000165732	9188	DDX21	DExD-box helicase 21	1	3	0.0162117	0.712276	1	0.0100183	0.680174	1	0.00916284	-0.843562	-1
ENSG00000165868	259217	HSPA12A	heat shock protein family A (Hsp70) member 12A	1	3	0.0096115	1.22987	1	0.0120325	0.770117	1	0.0265023	-0.67676	-1
ENSG00000165886	80019	UBTD1	ubiquitin domain containing 1	1	3	0.0273393	0.888617	1	0.00540332	1.69651	1	0.0399158	-0.649327	-1
ENSG00000166411	3419	IDH3A	isocitrate dehydrogenase (NAD(+)) 3 catalytic subunit alpha	1	3	0.0109942	0.94779	1	0.0112375	1.2724	1	0.0218019	-0.667533	-1
ENSG00000166510	80323	CCDC68	coiled-coil domain containing 68	1	3	0.000103564	1.73309	1	0.0336618	0.870455	1	0.000189132	-1.35182	-1
ENSG00000166860	9880	ZBTB39	zinc finger and BTB domain containing 39	1	3	0.0272234	0.904931	1	0.0192491	0.808863	1	0.00153634	-0.589953	-1
ENSG00000167112	26995	TRUB2	TruB pseudouridine synthase family member 2	1	3	0.00114873	1.45759	1	0.00725335	0.897166	1	0.0114898	-0.621311	-1
ENSG00000167114	10999	SLC27A4	solute carrier family 27 member 4	1	3	0.0237795	1.26233	1	0.0130011	1.09387	1	0.00115173	-1.78337	-1
ENSG00000167378	126298	IRGQ	immunity related GTPase Q	1	3	0.00451447	3.57503	1	0.0123447	2.23286	1	0.0114418	-1.99388	-1
ENSG00000167470	90007	MIDN	midnolin	1	3	0.0167428	1.13615	1	0.0126013	0.781914	1	0.023392	-0.958462	-1
ENSG00000167705	83547	RILP	Rab interacting lysosomal protein	1	3	0.030829	1.33907	1	0.0702758	0.701123	1	0.0120277	-1.03619	-1
ENSG00000167778	84926	SPRYD3	SPRY domain containing 3	1	3	0.0090464	0.98056	1	0.0154906	1.14341	1	0.0160083	-0.671932	-1
ENSG00000167842	79003	MIS12	MIS12 kinetochore complex component	1	3	0.0189817	0.733014	1	0.0323956	0.728852	1	0.0273649	-0.700718	-1
ENSG00000168461	11031	RAB31	RAB31, member RAS oncogene family	1	3	0.00127576	3.31568	1	0.000104093	2.344	1	0.00420131	-1.47105	-1
ENSG00000168758	54910	SEMA4C	semaphorin 4C	1	3	0.00241567	1.76297	1	0.00508592	0.831475	1	0.0160647	-0.613272	-1
ENSG00000169016	1876	E2F6	E2F transcription factor 6	1	3	0.0320499	0.911782	1	0.0138922	1.11687	1	0.0243701	-0.977722	-1
ENSG00000169641	7798	LUZP1	leucine zipper protein 1	1	3	0.0124157	1.49639	1	0.0128993	1.05792	1	0.0041168	-0.886558	-1
ENSG00000169710	2194	FASN	fatty acid synthase	1	3	0.0219465	0.756247	1	0.0305399	1.49615	1	0.0693929	-0.660644	-1
ENSG00000170185	84640	USP38	ubiquitin specific peptidase 38	1	3	0.00608363	0.938518	1	0.00145201	0.777803	1	0.00442819	-1.08466	-1
ENSG00000170234	114825	PWWP2A	PWWP domain containing 2A	1	3	0.0402184	0.702808	1	0.00647971	0.59767	1	0.0274091	-0.642076	-1
ENSG00000170340	10678	B3GNT2	UDP-GlcNAc:betaGal beta-1,3-N-acetylglucosaminyltransferase 2	1	3	0.0188333	0.844227	1	0.0187329	1.08585	1	0.00939573	-0.804903	-1
ENSG00000170468	79697	RIOX1	ribosomal oxygenase 1	1	3	0.0252989	1.14931	1	0.00109315	1.23888	1	0.000578511	-1.58327	-1
ENSG00000170606	3308	HSPA4	heat shock protein family A (Hsp70) member 4	1	3	0.0257496	0.618574	1	0.00351747	0.682057	1	0.0115487	-1.15946	-1
ENSG00000170619	28991	COMMD5	COMM domain containing 5	1	3	0.00613814	1.16614	1	0.0051669	1.16717	1	0.00516496	-0.864861	-1
ENSG00000171208	81831	NETO2	neuropilin and tolloid like 2	1	3	0.00209068	2.11104	1	0.00201006	1.62894	1	0.00729323	-1.20737	-1
ENSG00000171223	3726	JUNB	JunB proto-oncogene, AP-1 transcription factor subunit	1	3	0.00402788	3.21403	1	0.00340243	1.4677	1	0.0167594	-1.11052	-1
ENSG00000171246	4884	NPTX1	neuronal pentraxin 1	1	3	0.000870148	3.27677	1	0.000715949	2.82756	1	0.00211856	-1.85389	-1
ENSG00000171421	64979	MRPL36	mitochondrial ribosomal protein L36	1	3	0.0269905	0.761782	1	0.023647	0.972983	1	0.0208936	-0.937338	-1
ENSG00000171729	55092	TMEM51	transmembrane protein 51	1	3	0.00130258	0.894352	1	0.00345236	1.48097	1	0.00299153	-1.30764	-1
ENSG00000172216	1051	CEBPB	CCAAT enhancer binding protein beta	1	3	0.00317713	2.10278	1	0.00289661	1.4566	1	0.00679605	-0.788392	-1
ENSG00000172315	112858	TP53RK	TP53 regulating kinase	1	3	0.00264097	1.75926	1	0.00142255	2.05604	1	0.00265896	-0.956397	-1
ENSG00000172375	9854	C2CD2L	C2CD2 like	1	3	0.00507763	1.57696	1	0.0390275	0.619098	1	0.00927452	-1.61696	-1
ENSG00000172379	9915	ARNT2	aryl hydrocarbon receptor nuclear translocator 2	1	3	0.0176964	0.596925	1	0.00727558	0.863628	1	0.00847936	-0.950387	-1
ENSG00000172590	122704	MRPL52	mitochondrial ribosomal protein L52	1	3	0.00467749	1.34332	1	0.015048	1.20829	1	0.0217638	-0.689596	-1
ENSG00000172840	57546	PDP2	pyruvate dehyrogenase phosphatase catalytic subunit 2	1	3	0.0037897	1.52709	1	0.00506263	1.08261	1	0.00510939	-1.12854	-1
ENSG00000173085	27235	COQ2	coenzyme Q2, polyprenyltransferase	1	3	0.019669	1.09353	1	0.0196353	0.645627	1	0.0190967	-1.02192	-1
ENSG00000173334	10221	TRIB1	tribbles pseudokinase 1	1	3	0.000211538	4.27964	1	0.00638514	3.39761	1	0.0192475	-1.50681	-1
ENSG00000173442	254102	EHBP1L1	EH domain binding protein 1 like 1	1	3	0.0141978	0.726899	1	0.00463709	0.588937	1	0.0124167	-0.623394	-1
ENSG00000173465	10534	ZNRD2	zinc ribbon domain containing 2	1	3	0.036452	0.702213	1	0.0306219	0.663063	1	0.0288278	-0.824829	-1
ENSG00000173846	1263	PLK3	polo like kinase 3	1	3	0.00337509	3.2755	1	0.000106563	2.81321	1	0.000328335	-1.16762	-1
ENSG00000173905	27333	GOLIM4	golgi integral membrane protein 4	1	3	0.0119123	0.827582	1	0.029621	0.65633	1	0.0103825	-0.847989	-1
ENSG00000174007	84984	CEP19	centrosomal protein 19	1	3	0.0113347	1.18026	1	0.0070771	0.959161	1	0.0141164	-1.03342	-1
ENSG00000174276	741	ZNHIT2	zinc finger HIT-type containing 2	1	3	0.0208118	1.1329	1	0.0126588	1.12346	1	0.0266988	-0.953934	-1
ENSG00000174574	79647	AKIRIN1	akirin 1	1	3	0.0222784	0.830705	1	0.00250035	1.20373	1	0.00206828	-1.18803	-1
ENSG00000174718	55196	RESF1	retroelement silencing factor 1	1	3	0.00974665	2.61413	1	0.034391	0.974462	1	0.01604	-1.84209	-1
ENSG00000174744	25855	BRMS1	BRMS1 transcriptional repressor and anoikis regulator	1	3	0.00960056	1.13492	1	0.00363585	0.615703	1	0.00594301	-1.29995	-1
ENSG00000174996	64837	KLC2	kinesin light chain 2	1	3	0.0344804	1.12575	1	0.0301498	0.99257	1	0.023274	-1.47022	-1
ENSG00000175040	9435	CHST2	carbohydrate sulfotransferase 2	1	3	0.0020367	6.88801	1	0.0014162	3.77577	1	0.0135019	-1.02057	-1
ENSG00000175130	65108	MARCKSL1	MARCKS like 1	1	3	0.0110316	1.8031	1	0.00195907	1.41105	1	0.0263271	-0.833751	-1
ENSG00000175182	131408	FAM131A	family with sequence similarity 131 member A	1	3	0.00477364	2.39513	1	0.00232569	1.23727	1	0.00141108	-1.22404	-1
ENSG00000176155	284001	CCDC57	coiled-coil domain containing 57	1	3	0.00968737	1.71855	1	0.0205256	0.839824	1	0.0205789	-0.711058	-1
ENSG00000176641	220441	RNF152	ring finger protein 152	1	3	0.0105411	1.62296	1	0.0034933	0.852409	1	0.00160727	-1.65262	-1
ENSG00000176907	56892	TCIM	transcriptional and immune response regulator	1	3	0.00375106	4.70406	1	0.00159033	3.63502	1	0.0034109	-1.96131	-1
ENSG00000177042	283232	TMEM80	transmembrane protein 80	1	3	0.013451	0.969047	1	0.00928634	0.624901	1	0.0195856	-0.622861	-1
ENSG00000177076	340485	ACER2	alkaline ceramidase 2	1	3	0.00379746	2.21675	1	0.00970148	0.881214	1	0.000499471	-0.838217	-1
ENSG00000177628	2629	GBA	glucosylceramidase beta	1	3	0.00584298	1.58198	1	0.0255378	0.688687	1	0.0102112	-1.58176	-1
ENSG00000178896	54512	EXOSC4	exosome component 4	1	3	0.0181336	1.53675	1	0.0159367	2.25884	1	0.0145988	-0.610866	-1
ENSG00000179041	23212	RRS1	ribosome biogenesis regulator 1 homolog	1	3	0.0258594	0.884937	1	0.0248259	0.78281	1	0.0118289	-1.56816	-1
ENSG00000179051	55920	RCC2	regulator of chromosome condensation 2	1	3	0.000612562	1.89528	1	0.0193155	1.04439	1	0.000176253	-1.66864	-1
ENSG00000179862	163732	CITED4	Cbp/p300 interacting transactivator with Glu/Asp rich carboxy-terminal domain 4	1	3	0.0295702	1.64169	1	0.016744	1.32932	1	0.0347639	-0.855561	-1
ENSG00000179965	51333	ZNF771	zinc finger protein 771	1	3	0.00925529	1.23453	1	0.0164273	1.12342	1	0.0306258	-0.712321	-1
ENSG00000180035	197407	ZNF48	zinc finger protein 48	1	3	0.0318119	0.851453	1	0.0388296	0.646157	1	0.0160157	-0.771555	-1
ENSG00000180875	64388	GREM2	gremlin 2, DAN family BMP antagonist	1	3	0.00210586	1.55844	1	0.0157188	0.663844	1	0.00267925	-1.61232	-1
ENSG00000181026	64782	AEN	apoptosis enhancing nuclease	1	3	0.0118467	0.718653	1	0.039066	0.754689	1	0.0128668	-1.58288	-1
ENSG00000181274	23401	FRAT2	FRAT regulator of WNT signaling pathway 2	1	3	0.0029162	1.73096	1	0.0105173	1.0646	1	0.00763462	-1.4016	-1
ENSG00000181649	7262	PHLDA2	pleckstrin homology like domain family A member 2	1	3	0.0312149	1.57393	1	0.00883557	2.34952	1	0.0427059	-0.923272	-1
ENSG00000182325	26233	FBXL6	F-box and leucine rich repeat protein 6	1	3	0.0194848	1.23131	1	0.00104446	0.994569	1	0.00774047	-1.03142	-1
ENSG00000183578	388121	TNFAIP8L3	TNF alpha induced protein 8 like 3	1	3	0.000820924	2.71995	1	0.0244157	1.60664	1	0.0255212	-1.51232	-1
ENSG00000184205	64061	TSPYL2	TSPY like 2	1	3	0.0205847	1.57396	1	0.00997283	0.720494	1	0.00398818	-0.654286	-1
ENSG00000184207	283871	PGP	phosphoglycolate phosphatase	1	3	0.00675988	1.2489	1	0.00655064	1.78046	1	0.0207463	-0.625941	-1
ENSG00000184232	220323	OAF	out at first homolog	1	3	0.000940367	1.77468	1	0.0004259	2.70449	1	0.00398694	-1.05158	-1
ENSG00000184281	10078	TSSC4	tumor suppressing subtransferable candidate 4	1	3	0.0490822	0.723767	1	0.0305602	0.597029	1	0.0294767	-0.983022	-1
ENSG00000184349	1946	EFNA5	ephrin A5	1	3	0.00203299	2.37334	1	0.0167675	0.905207	1	0.00567096	-1.77567	-1
ENSG00000184374	10584	COLEC10	collectin subfamily member 10	1	3	0.00936521	3.52634	1	0.0190328	1.58308	1	0.00884351	-2.75222	-1
ENSG00000184524	51286	CEND1	cell cycle exit and neuronal differentiation 1	1	3	0.025985	1.59868	1	0.0557129	0.819641	1	0.0484995	-1.29826	-1
ENSG00000184588	5142	PDE4B	phosphodiesterase 4B	1	3	0.0021362	2.89519	1	0.00163991	2.5696	1	0.00334139	-1.4066	-1
ENSG00000185112	131583	FAM43A	family with sequence similarity 43 member A	1	3	0.00712879	2.74953	1	0.00345413	2.07071	1	0.00619972	-1.55917	-1
ENSG00000185215	7127	TNFAIP2	TNF alpha induced protein 2	1	3	0.0371978	0.718926	1	0.0111773	1.02946	1	0.00555311	-1.03904	-1
ENSG00000185262	283991	UBALD2	UBA like domain containing 2	1	3	0.00846665	2.89555	1	0.0230199	1.4369	1	0.0242204	-1.33386	-1
ENSG00000185803	79581	SLC52A2	solute carrier family 52 member 2	1	3	0.00963514	0.853047	1	0.00475565	1.27284	1	0.00727717	-0.968327	-1
ENSG00000186577	221491	SMIM29	small integral membrane protein 29	1	3	0.0263488	1.2725	1	0.0381694	1.04091	1	0.0590118	-0.711703	-1
ENSG00000186716	613	BCR	BCR activator of RhoGEF and GTPase	1	3	0.000778934	1.20007	1	0.0216567	0.90522	1	0.0130545	-1.35758	-1
ENSG00000187479	387763	C11orf96	chromosome 11 open reading frame 96	1	3	0.00115596	5.27206	1	0.00791355	4.60289	1	0.0117376	-1.15341	-1
ENSG00000189050	51136	RNFT1	ring finger protein, transmembrane 1	1	3	0.0267549	1.23542	1	0.000805575	1.12461	1	0.0325946	-0.665652	-1
ENSG00000196072	282991	BLOC1S2	biogenesis of lysosomal organelles complex 1 subunit 2	1	3	0.0200573	0.86146	1	0.0114852	0.584006	1	0.0131657	-0.710437	-1
ENSG00000197063	4097	MAFG	MAF bZIP transcription factor G	1	3	0.0155191	1.48519	1	0.00547424	1.99997	1	0.0264155	-0.620015	-1
ENSG00000197114	84619	ZGPAT	zinc finger CCCH-type and G-patch domain containing	1	3	0.00546542	0.806874	1	0.00722565	0.680108	1	0.00228035	-0.682426	-1
ENSG00000197136	399909	PCNX3	pecanex 3	1	3	0.00688779	0.609158	1	0.0451627	0.642454	1	0.00377788	-0.865594	-1
ENSG00000197142	51703	ACSL5	acyl-CoA synthetase long chain family member 5	1	3	0.00416108	3.70382	1	0.00284333	2.02376	1	0.00733486	-1.91297	-1
ENSG00000197208	6583	SLC22A4	solute carrier family 22 member 4	1	3	0.000989238	2.60844	1	0.0132248	1.30015	1	0.00962209	-1.17621	-1
ENSG00000197321	6840	SVIL	supervillin	1	3	0.00954076	2.43681	1	0.00892731	0.906457	1	0.00253211	-1.7566	-1
ENSG00000197324	26020	LRP10	LDL receptor related protein 10	1	3	0.00853846	1.18033	1	0.0235917	0.672368	1	0.0156436	-0.784658	-1
ENSG00000197362	136051	ZNF786	zinc finger protein 786	1	3	0.00710374	0.966939	1	0.014549	0.689091	1	0.00858821	-1.13242	-1
ENSG00000197451	3182	HNRNPAB	heterogeneous nuclear ribonucleoprotein A/B	1	3	0.0323319	0.669973	1	0.00315279	2.05425	1	0.00905011	-1.04455	-1
ENSG00000197555	26037	SIPA1L1	signal induced proliferation associated 1 like 1	1	3	0.0131006	1.25938	1	0.0200095	1.45595	1	0.00972812	-0.757411	-1
ENSG00000197565	1288	COL4A6	collagen type IV alpha 6 chain	1	3	0.0156613	1.19011	1	0.0141576	0.714721	1	0.00475318	-1.04413	-1
ENSG00000197594	5167	ENPP1	ectonucleotide pyrophosphatase/phosphodiesterase 1	1	3	0.000315808	2.96862	1	0.0148278	1.14137	1	0.00408839	-2.69533	-1
ENSG00000197622	56882	CDC42SE1	CDC42 small effector 1	1	3	0.0160236	1.82967	1	0.00381669	2.32048	1	0.00387879	-1.16131	-1
ENSG00000197774	197342	EME2	essential meiotic structure-specific endonuclease subunit 2	1	3	0.0337414	1.36636	1	0.0239603	0.796946	1	0.0162602	-0.992887	-1
ENSG00000197780	6884	TAF13	TATA-box binding protein associated factor 13	1	3	0.0140321	0.650189	1	0.023419	1.18441	1	0.0147712	-0.959717	-1
ENSG00000198055	2870	GRK6	G protein-coupled receptor kinase 6	1	3	0.010464	1.28775	1	0.0226369	0.868483	1	0.00514397	-1.13554	-1
ENSG00000198604	11177	BAZ1A	bromodomain adjacent to zinc finger domain 1A	1	3	0.017837	0.720388	1	0.0118656	0.614805	1	0.0102613	-1.21618	-1
ENSG00000198712	4513	MT-CO2	mitochondrially encoded cytochrome c oxidase II	1	3	0.0951454	0.922644	1	0.018296	1.68377	1	0.0557029	-1.53891	-1
ENSG00000198786	4540	MT-ND5	mitochondrially encoded NADH:ubiquinone oxidoreductase core subunit 5	1	3	0.0718125	1.54261	1	0.0608472	1.00323	1	0.0697548	-1.47286	-1
ENSG00000198814	2710	GK	glycerol kinase	1	3	0.000427488	3.05387	1	0.000771701	3.76287	1	0.000159845	-1.29049	-1
ENSG00000198840	4537	MT-ND3	mitochondrially encoded NADH:ubiquinone oxidoreductase core subunit 3	1	3	0.0013121	0.927029	1	0.0453975	1.27127	1	0.00383698	-2.49258	-1
ENSG00000198886	4538	MT-ND4	mitochondrially encoded NADH:ubiquinone oxidoreductase core subunit 4	1	3	0.085732	0.870964	1	0.0181083	1.13956	1	0.0337795	-1.62453	-1
ENSG00000198890	55170	PRMT6	protein arginine methyltransferase 6	1	3	0.0203947	0.926793	1	0.0287112	0.888867	1	0.0292525	-0.852891	-1
ENSG00000198899	4508	MT-ATP6	mitochondrially encoded ATP synthase membrane subunit 6	1	3	0.0471546	1.60836	1	0.0529308	1.00492	1	0.0292953	-2.43477	-1
ENSG00000198938	4514	MT-CO3	mitochondrially encoded cytochrome c oxidase III	1	3	0.0662472	0.62551	1	0.00227364	1.522	1	0.0109008	-2.26556	-1
ENSG00000198959	7052	TGM2	transglutaminase 2	1	3	0.00890773	1.24068	1	0.00149135	2.44019	1	0.00277823	-2.25938	-1
ENSG00000201801	100873829	RNU5E-4P	RNA, U5E small nuclear 4, pseudogene	1	3	0.0482837	2.35205	1	0.0400983	1.39624	1	0.0138806	-1.52766	-1
ENSG00000204237	339229	OXLD1	oxidoreductase like domain containing 1	1	3	0.0484772	0.737608	1	0.0209285	0.736719	1	0.0329584	-0.64904	-1
ENSG00000204386	4758	NEU1	neuraminidase 1	1	3	0.0178876	0.693499	1	0.0123176	0.670716	1	0.0132459	-0.816912	-1
ENSG00000204438	7918	GPANK1	G-patch domain and ankyrin repeats 1	1	3	0.00850953	2.22999	1	0.00234686	1.12973	1	0.0185213	-0.767361	-1
ENSG00000206652	26871	RNU1-1	RNA, U1 small nuclear 1	1	3	0.0309732	2.1474	1	0.00786027	1.1846	1	0.0570743	-0.992772	-1
ENSG00000206828	115409984	RNVU1-30	RNA, variant U1 small nuclear 30	1	3	0.0153499	3.0597	1	0.0529252	1.16884	1	0.0134577	-2.4519	-1
ENSG00000207005	26870	RNU1-2	RNA, U1 small nuclear 2	1	3	0.0514914	1.85628	1	0.0290573	1.49922	1	0.00523906	-1.13068	-1
ENSG00000207205	101954267	RNVU1-15	RNA, variant U1 small nuclear 15	1	3	0.00424241	2.91972	1	0.0961129	1.26282	1	0.0411323	-2.29238	-1
ENSG00000207561	693220	MIR635	microRNA 635	1	3	0.0391695	1.27354	1	0.0447768	1.19976	1	0.0018054	-1.78876	-1
ENSG00000210196	0	MT-TP	mitochondrially encoded tRNA-Pro (CCN)	1	3	0.0281302	1.25763	1	0.0456567	1.23256	1	0.0215556	-2.65204	-1
ENSG00000211448	1734	DIO2	iodothyronine deiodinase 2	1	3	0.000860268	3.1174	1	0.00283963	1.73645	1	0.000364502	-3.75059	-1
ENSG00000212195	0	U3	NA	1	3	0.00399153	2.12561	1	0.000475653	1.36875	1	0.00771489	-1.39244	-1
ENSG00000213523	10011	SRA1	steroid receptor RNA activator 1	1	3	0.0264042	0.893277	1	0.0242742	1.00154	1	0.0251845	-0.737098	-1
ENSG00000214176	440456	PLEKHM1P1	pleckstrin homology and RUN domain containing M1 pseudogene 1	1	3	0.00906651	1.62042	1	0.00361397	0.967096	1	0.00792819	-0.683284	-1
ENSG00000214717	9189	ZBED1	zinc finger BED-type containing 1	1	3	0.00719866	1.08102	1	0.0129751	0.70363	1	0.00954817	-0.680891	-1
ENSG00000215251	60493	FASTKD5	FAST kinase domains 5	1	3	0.0124031	0.7148	1	0.0207773	0.696025	1	0.011546	-0.781574	-1
ENSG00000222009	149478	BTBD19	BTB domain containing 19	1	3	0.012446	2.14681	1	0.00640737	1.62707	1	0.0383065	-0.601631	-1
ENSG00000222724	106480225	RNU2-63P	RNA, U2 small nuclear 63, pseudogene	1	3	0.0351374	2.34659	1	0.0552442	0.645639	1	5.38109e-05	-2.46169	-1
ENSG00000226328	100506714	NUP50-DT	NUP50 divergent transcript	1	3	0.00701447	0.894636	1	0.0161658	0.831165	1	0.0075831	-1.087	-1
ENSG00000228526	106614088	MIR34AHG	MIR34A host gene	1	3	0.0059132	3.66158	1	0.000706422	3.00413	1	0.0263853	-0.660268	-1
ENSG00000229512	0	AC068580.1	novel transcript	1	3	0.0173613	1.70331	1	0.0683641	0.667498	1	0.0288569	-1.00193	-1
ENSG00000230918	100131604	DPP4-DT	DPP4 divergent transcript	1	3	0.000508469	0.830304	1	0.0183335	0.779269	1	0.0173701	-0.811125	-1
ENSG00000233276	2876	GPX1	glutathione peroxidase 1	1	3	0.00203405	0.732449	1	0.00215508	0.601076	1	0.000955011	-1.20923	-1
ENSG00000233621	728431	LINC01137	long intergenic non-protein coding RNA 1137	1	3	0.0204686	1.54667	1	0.0485145	0.58896	1	0.0173712	-1.36167	-1
ENSG00000239521	352954	CASTOR3	CASTOR family member 3	1	3	0.0201463	0.69599	1	0.0313671	0.627936	1	0.0120106	-1.1785	-1
ENSG00000241886	0	AC112496.1	novel transcript, sense intronic to GK	1	3	0.00108857	1.95672	1	0.042497	2.00763	1	0.0248193	-1.05596	-1
ENSG00000247077	192111	PGAM5	PGAM family member 5, mitochondrial serine/threonine protein phosphatase	1	3	0.0192835	0.784754	1	0.0470134	0.85825	1	0.0158394	-1.18386	-1
ENSG00000247626	92935	MARS2	methionyl-tRNA synthetase 2, mitochondrial	1	3	0.0134866	1.674	1	0.0100048	1.10022	1	0.00512368	-1.61072	-1
ENSG00000248527	106480796	MTATP6P1	MT-ATP6 pseudogene 1	1	3	0.0577047	1.64418	1	0.0209155	1.2436	1	0.0320958	-2.3742	-1
ENSG00000254470	91056	AP5B1	adaptor related protein complex 5 subunit beta 1	1	3	0.00233186	1.81635	1	0.0122743	1.01434	1	0.00422142	-0.934649	-1
ENSG00000257453	0	AC011611.3	novel transcript, antisense to PHLDA1	1	3	0.0347881	1.70903	1	0.0121551	1.70724	1	0.086142	-0.602905	-1
ENSG00000258412	0	AL355102.1	novel transcript, sense intronic to BDKRB2	1	3	0.0203126	1.95018	1	0.00785833	1.79475	1	0.0195402	-2.01356	-1
ENSG00000258788	317780	CKS1BP1	CDC28 protein kinase regulatory subunit 1B pseudogene 1	1	3	0.0135293	1.94127	1	0.0459956	1.64423	1	0.00623518	-1.78544	-1
ENSG00000259642	283687	ST20-AS1	ST20 antisense RNA 1	1	3	0.00101094	1.01734	1	0.020587	0.669402	1	0.0109458	-0.716115	-1
ENSG00000260912	0	AL158206.1	novel transcript, overlapping ACER2	1	3	0.00500917	2.00439	1	0.0747241	0.65535	1	0.0191159	-0.875963	-1
ENSG00000262074	780852	SNORD3B-2	small nucleolar RNA, C/D box 3B-2	1	3	0.0141902	3.00177	1	0.0558786	2.27028	1	0.010865	-2.20818	-1
ENSG00000263528	9641	IKBKE	inhibitor of nuclear factor kappa B kinase subunit epsilon	1	3	0.000500529	2.3255	1	0.0164742	1.03859	1	0.00650917	-1.81112	-1
ENSG00000265185	26851	SNORD3B-1	small nucleolar RNA, C/D box 3B-1	1	3	0.00486715	2.61521	1	0.0793229	1.50734	1	0.0160143	-2.11035	-1
ENSG00000268543	0	AC012313.4	novel transcript	1	3	0.0303943	1.23106	1	0.0588181	0.607083	1	0.0316793	-0.757418	-1
ENSG00000268670	0	AC016586.1	novel transcript, sense intronic to ZBTB7A	1	3	0.0457733	1.35265	1	0.0357105	0.913897	1	0.0918589	-0.690063	-1
ENSG00000269352	101928378	PTOV1-AS2	PTOV1 antisense RNA 2	1	3	0.00539397	2.57516	1	0.0213975	1.82158	1	0.0288128	-1.24741	-1
ENSG00000269374	0	AC011497.2	zinc finger, AN1-type domain 5 (ZFAND5) pseudogene	1	3	0.0443859	1.0527	1	0.0500681	1.39776	1	0.0527773	-0.717095	-1
ENSG00000269825	0	AC022150.4	novel transcript, sense intronic to ZNF83	1	3	0.0155425	1.85455	1	0.00882287	1.87724	1	0.0560376	-0.72941	-1
ENSG00000269899	0	AC025857.2	novel transcript, sense intronic to CTSB	1	3	0.0546048	2.5019	1	0.0411609	2.32265	1	0.0258118	-1.2667	-1
ENSG00000270722	115482718	RNVU1-31	RNA, variant U1 small nuclear 31	1	3	0.0732299	2.57402	1	0.0150783	2.53235	1	0.0440164	-1.58902	-1
ENSG00000273604	100170841	EPOP	elongin BC and polycomb repressive complex 2 associated protein	1	3	0.0139841	2.0703	1	0.017922	0.855314	1	0.0520547	-0.585682	-1
ENSG00000273768	115409989	RNVU1-29	RNA, variant U1 small nuclear 29	1	3	0.0395503	1.62285	1	0.0291129	1.43574	1	0.0375226	-1.31661	-1
ENSG00000274210	115409988	RNVU1-27	RNA, variant U1 small nuclear 27	1	3	0.00535639	2.96666	1	0.0490168	2.76586	1	0.00445466	-1.68916	-1
ENSG00000275022	102465451	MIR6753	microRNA 6753	1	3	0.096494	1.47356	1	0.073226	0.879199	1	0.0677618	-0.946801	-1
ENSG00000275405	0	U1	#N/A	1	3	0.0683659	1.68593	1	0.0778331	1.39362	1	0.0570355	-1.11313	-1
ENSG00000276045	84876	ORAI1	ORAI calcium release-activated calcium modulator 1	1	3	0.0127717	1.2353	1	0.00866055	1.29438	1	0.00084192	-1.21828	-1
ENSG00000276216	0	AC245014.3	novel transcript	1	3	0.0329647	3.34713	1	0.0120199	1.43353	1	0.025398	-2.41244	-1
ENSG00000277791	5691	PSMB3	proteasome 20S subunit beta 3	1	3	0.0219963	0.594805	1	0.012293	0.598713	1	0.000368031	-1.02208	-1
ENSG00000286172	101447996	RNVU1-8	#N/A	1	3	0.0393927	3.1128	1	0.08816	1.41405	1	0.0488682	-2.43009	-1
ENSG00000081181	384	ARG2	arginase 2	2	1	0.0119381	1.48648	1	0.0892646	0.156139	0	0.0207249	1.01759	1
ENSG00000102007	5355	PLP2	proteolipid protein 2	2	1	0.0447507	0.616396	1	0.022675	0.55855	0	0.0361625	0.744312	1
ENSG00000110328	374378	GALNT18	polypeptide N-acetylgalactosaminyltransferase 18	2	1	0.0131381	1.57673	1	0.0280919	0.548593	0	0.00840843	1.03433	1
ENSG00000111981	80329	ULBP1	UL16 binding protein 1	2	1	0.0377119	0.632805	1	0.123136	-0.171276	0	0.0367391	0.59601	1
ENSG00000115548	55818	KDM3A	lysine demethylase 3A	2	1	0.00964697	0.630322	1	0.00484986	0.467517	0	0.00290967	1.3584	1
ENSG00000133874	79845	RNF122	ring finger protein 122	2	1	0.0253077	0.62567	1	0.12412	-0.236421	0	0.0265028	1.01223	1
ENSG00000146242	7162	TPBG	trophoblast glycoprotein	2	1	0.00777117	1.06358	1	0.237408	-0.0503193	0	0.0101653	0.641919	1
ENSG00000154721	58494	JAM2	junctional adhesion molecule 2	2	1	0.0105875	0.846262	1	0.0640408	0.200721	0	0.000134263	1.81159	1
ENSG00000155508	9337	CNOT8	CCR4-NOT transcription complex subunit 8	2	1	0.0131895	0.711719	1	0.00970272	0.292946	0	0.00489838	0.679569	1
ENSG00000173376	79625	NDNF	neuron derived neurotrophic factor	2	1	0.0024162	1.33294	1	0.0270693	0.548048	0	0.00325423	0.991965	1
ENSG00000181744	205428	DIPK2A	divergent protein kinase domain 2A	2	1	0.0233229	1.18055	1	0.0502077	0.173467	0	0.0233416	1.11173	1
ENSG00000182809	1397	CRIP2	cysteine rich protein 2	2	1	0.0177177	0.789924	1	0.0133303	0.575869	0	0.0169037	0.717364	1
ENSG00000196549	4311	MME	membrane metalloendopeptidase	2	1	0.0123525	1.27431	1	0.0263587	0.519572	0	0.00975423	1.23995	1
ENSG00000196890	128312	H2BU1	H2B.U histone 1	2	1	0.0403691	0.682059	1	0.111124	0.2261	0	0.0163998	1.19833	1
ENSG00000198046	63934	ZNF667	zinc finger protein 667	2	1	0.0278013	0.760689	1	0.0664723	0.325549	0	0.0196604	0.860441	1
ENSG00000198835	57165	GJC2	gap junction protein gamma 2	2	1	0.0662636	0.585668	1	0.0361424	0.261759	0	0.0495171	0.626852	1
ENSG00000240024	100505687	LINC00888	long intergenic non-protein coding RNA 888	2	1	0.0201641	0.71586	1	0.0296246	0.430016	0	0.00588091	0.750271	1
ENSG00000265972	10628	TXNIP	thioredoxin interacting protein	2	1	0.0580443	1.07653	1	0.0692228	0.164209	0	0.00376517	1.51967	1
ENSG00000003056	4074	M6PR	mannose-6-phosphate receptor, cation dependent	2	2	0.014849	0.708396	1	0.0249439	0.396154	0	0.0196341	-0.296387	0
ENSG00000003402	8837	CFLAR	CASP8 and FADD like apoptosis regulator	2	2	0.0151196	0.594682	1	0.00396524	0.493233	0	0.0236754	-0.376372	0
ENSG00000005448	84058	WDR54	WD repeat domain 54	2	2	0.0459709	0.802149	1	0.000124382	0.384691	0	0.0687777	0.559796	0
ENSG00000005801	7748	ZNF195	zinc finger protein 195	2	2	0.0292491	0.611194	1	0.0231715	0.52742	0	0.0431577	-0.309139	0
ENSG00000006652	3475	IFRD1	interferon related developmental regulator 1	2	2	0.0410494	0.71734	1	0.115695	0.199176	0	0.0165349	-0.527938	0
ENSG00000008083	3720	JARID2	jumonji and AT-rich interaction domain containing 2	2	2	0.00620219	1.8898	1	0.0297955	0.470579	0	0.0595404	-0.389544	0
ENSG00000012963	55148	UBR7	ubiquitin protein ligase E3 component n-recognin 7 (putative)	2	2	0.0162036	1.02104	1	0.0238246	0.463662	0	0.0445161	-0.471393	0
ENSG00000013573	1663	DDX11	DEAD/H-box helicase 11	2	2	0.0730011	0.767197	1	0.0373061	0.429032	0	0.0231554	-0.400535	0
ENSG00000023041	64429	ZDHHC6	zinc finger DHHC-type containing 6	2	2	0.0160501	0.876062	1	0.0956397	-0.197633	0	0.0367438	-0.539473	0
ENSG00000023902	51177	PLEKHO1	pleckstrin homology domain containing O1	2	2	0.02462	0.801363	1	0.0305865	0.347748	0	0.0149058	-0.373928	0
ENSG00000032742	8100	IFT88	intraflagellar transport 88	2	2	0.0126939	0.727489	1	0.0199326	0.287128	0	0.0520647	-0.24018	0
ENSG00000038358	23644	EDC4	enhancer of mRNA decapping 4	2	2	0.0147357	0.647991	1	0.031536	0.491467	0	0.0537287	-0.201885	0
ENSG00000040275	54908	SPDL1	spindle apparatus coiled-coil protein 1	2	2	0.0173435	0.819761	1	0.08343	0.441852	0	0.0784845	0.182036	0
ENSG00000046647	54960	GEMIN8	gem nuclear organelle associated protein 8	2	2	0.018819	0.889553	1	0.0413874	0.268517	0	0.0312518	-0.504695	0
ENSG00000053372	51154	MRTO4	MRT4 homolog, ribosome maturation factor	2	2	0.0321533	0.827005	1	0.00588673	0.482974	0	0.136737	-0.041568	0
ENSG00000056586	54542	RC3H2	ring finger and CCCH-type domains 2	2	2	0.0466886	0.654568	1	0.0125284	0.22034	0	0.0399949	-0.387708	0
ENSG00000058453	9696	CROCC	ciliary rootlet coiled-coil, rootletin	2	2	0.0156817	0.720467	1	0.00203458	0.514976	0	0.0225849	-0.163158	0
ENSG00000060069	9150	CTDP1	CTD phosphatase subunit 1	2	2	0.052621	0.600187	1	0.0502359	0.344774	0	0.2105	-0.161625	0
ENSG00000060339	55749	CCAR1	cell division cycle and apoptosis regulator 1	2	2	0.0044229	0.698732	1	0.0467174	0.250992	0	0.0180078	-0.441248	0
ENSG00000060491	11054	OGFR	opioid growth factor receptor	2	2	0.027867	0.838454	1	0.0229377	0.476797	0	0.0964601	0.199243	0
ENSG00000060749	79832	QSER1	glutamine and serine rich 1	2	2	0.0986032	0.959575	1	0.224879	0.167803	0	0.832357	0.0526187	0
ENSG00000063176	56848	SPHK2	sphingosine kinase 2	2	2	0.0282897	0.659189	1	0.00914591	0.491757	0	0.0349929	-0.537395	0
ENSG00000063854	3029	HAGH	hydroxyacylglutathione hydrolase	2	2	0.035073	0.797821	1	0.485594	-0.0313893	0	0.0349707	-0.458919	0
ENSG00000065613	9748	SLK	STE20 like kinase	2	2	0.0172075	0.70266	1	0.0103038	0.52333	0	0.303872	-0.057206	0
ENSG00000065989	5141	PDE4A	phosphodiesterase 4A	2	2	0.0176094	0.65326	1	0.174885	0.105973	0	0.0263237	-0.506954	0
ENSG00000067334	30836	DNTTIP2	deoxynucleotidyltransferase terminal interacting protein 2	2	2	0.0394809	0.631323	1	0.0559411	0.463093	0	0.248633	-0.119361	0
ENSG00000067715	6857	SYT1	synaptotagmin 1	2	2	0.0130351	1.15431	1	0.0342362	0.33878	0	0.0311644	0.487413	0
ENSG00000068308	55593	OTUD5	OTU deubiquitinase 5	2	2	0.017683	0.667226	1	0.0210688	0.488014	0	0.0466163	-0.251469	0
ENSG00000068745	51447	IP6K2	inositol hexakisphosphate kinase 2	2	2	0.0152564	0.6251	1	0.00838938	0.456601	0	0.115897	0.0859166	0
ENSG00000070444	4335	MNT	MAX network transcriptional repressor	2	2	0.0155446	0.871294	1	0.203948	0.0649185	0	0.0484614	-0.360165	0
ENSG00000070476	79364	ZXDC	ZXD family zinc finger C	2	2	0.00472248	0.604015	1	0.0882228	0.16204	0	0.0373869	0.174397	0
ENSG00000074855	57719	ANO8	anoctamin 8	2	2	0.0180856	0.735456	1	0.0689328	0.418818	0	0.0498396	-0.430644	0
ENSG00000075413	4140	MARK3	microtubule affinity regulating kinase 3	2	2	0.0195819	0.683949	1	0.0117784	0.358466	0	0.0319898	-0.256019	0
ENSG00000075856	9733	SART3	spliceosome associated factor 3, U4/U6 recycling protein	2	2	0.00728352	0.671313	1	0.0485074	0.201155	0	0.00578934	-0.249301	0
ENSG00000076984	5609	MAP2K7	mitogen-activated protein kinase kinase 7	2	2	0.0187392	0.859188	1	0.00226853	0.537869	0	0.0853571	-0.0952612	0
ENSG00000077150	4791	NFKB2	nuclear factor kappa B subunit 2	2	2	0.0118181	0.659471	1	0.0732211	-0.09237	0	0.0031325	-0.388841	0
ENSG00000077348	56915	EXOSC5	exosome component 5	2	2	0.0116339	0.777033	1	0.1139	-0.236017	0	0.0560176	0.349312	0
ENSG00000078687	57690	TNRC6C	trinucleotide repeat containing adaptor 6C	2	2	0.00936768	0.743538	1	0.0745406	0.188384	0	0.0285865	-0.498435	0
ENSG00000079999	9817	KEAP1	kelch like ECH associated protein 1	2	2	0.00848324	0.673413	1	0.0221394	0.398343	0	0.0226101	-0.501443	0
ENSG00000080503	6595	SMARCA2	SWI/SNF related, matrix associated, actin dependent regulator of chromatin, subfamily a, member 2	2	2	0.0432436	0.587548	1	0.00356263	0.400096	0	0.00486927	-0.283553	0
ENSG00000083099	57226	LYRM2	LYR motif containing 2	2	2	0.021627	0.724719	1	0.0502135	0.572404	0	0.0789238	-0.232935	0
ENSG00000085382	57531	HACE1	HECT domain and ankyrin repeat containing E3 ubiquitin protein ligase 1	2	2	0.0287837	0.887983	1	0.00647177	0.223348	0	0.685927	0.0212392	0
ENSG00000085511	4216	MAP3K4	mitogen-activated protein kinase kinase kinase 4	2	2	0.0223597	0.674914	1	0.0037597	0.444322	0	0.516853	-0.0303459	0
ENSG00000085644	7760	ZNF213	zinc finger protein 213	2	2	0.0604903	0.582018	1	0.0584183	0.322281	0	0.104646	-0.295471	0
ENSG00000086189	27292	DIMT1	DIMT1 rRNA methyltransferase and ribosome maturation factor	2	2	0.00726288	0.585534	1	0.00635056	0.573168	0	0.0166819	-0.256428	0
ENSG00000086544	80271	ITPKC	inositol-trisphosphate 3-kinase C	2	2	0.0033204	0.580278	1	0.108175	0.300723	0	0.0761884	0.14095	0
ENSG00000086589	55696	RBM22	RNA binding motif protein 22	2	2	0.00842731	0.92018	1	0.0809252	0.289339	0	0.604315	-0.0281565	0
ENSG00000087074	23645	PPP1R15A	protein phosphatase 1 regulatory subunit 15A	2	2	0.0196637	0.933468	1	0.0254465	0.259749	0	0.0443541	0.304685	0
ENSG00000088448	55608	ANKRD10	ankyrin repeat domain 10	2	2	0.0218701	0.987828	1	0.0125633	0.573395	0	0.0475226	-0.39275	0
ENSG00000088682	57017	COQ9	coenzyme Q9	2	2	0.0102955	0.740439	1	0.00647124	0.411733	0	0.0559568	-0.189376	0
ENSG00000089159	5829	PXN	paxillin	2	2	0.0165776	1.07201	1	0.00547918	0.53554	0	0.103654	0.207122	0
ENSG00000089335	55900	ZNF302	zinc finger protein 302	2	2	0.0607664	0.605301	1	0.0303276	0.482008	0	0.0125501	-0.148594	0
ENSG00000089876	55760	DHX32	DEAH-box helicase 32 (putative)	2	2	0.00252752	0.89488	1	0.0517798	0.258257	0	0.0255658	0.303809	0
ENSG00000092094	55644	OSGEP	O-sialoglycoprotein endopeptidase	2	2	0.0189822	0.794333	1	0.152902	0.156252	0	0.0238641	-0.49435	0
ENSG00000092330	26277	TINF2	TERF1 interacting nuclear factor 2	2	2	0.0181561	0.711698	1	0.0530146	0.44388	0	0.0499589	-0.336783	0
ENSG00000095794	1390	CREM	cAMP responsive element modulator	2	2	0.0141687	0.661987	1	0.022882	0.284521	0	0.00246983	-0.383196	0
ENSG00000096717	23411	SIRT1	sirtuin 1	2	2	0.0527952	0.876639	1	0.0962174	0.199098	0	0.190595	-0.27344	0
ENSG00000097033	51100	SH3GLB1	SH3 domain containing GRB2 like, endophilin B1	2	2	0.00624629	0.590012	1	0.00631704	0.444109	0	0.158092	-0.0446774	0
ENSG00000099804	997	CDC34	cell division cycle 34	2	2	0.0316175	0.617081	1	0.0334727	0.425964	0	0.0541591	-0.415066	0
ENSG00000099992	83874	TBC1D10A	TBC1 domain family member 10A	2	2	0.0106131	0.784192	1	0.0170473	0.549359	0	0.0280972	-0.33276	0
ENSG00000100142	5435	POLR2F	RNA polymerase II subunit F	2	2	0.0390974	0.627698	1	0.0239135	0.545528	0	0.0583079	-0.260387	0
ENSG00000100242	25777	SUN2	Sad1 and UNC84 domain containing 2	2	2	0.0173656	0.822676	1	0.931058	-0.00348612	0	0.645485	0.0277753	0
ENSG00000100294	27349	MCAT	malonyl-CoA-acyl carrier protein transacylase	2	2	0.0458172	0.755693	1	0.0316295	0.335997	0	0.00837156	-0.439993	0
ENSG00000100296	8563	THOC5	THO complex 5	2	2	0.0244404	0.742633	1	0.0179014	0.479689	0	0.15341	0.108343	0
ENSG00000100335	54471	MIEF1	mitochondrial elongation factor 1	2	2	0.00545201	0.614043	1	0.0580293	0.289859	0	0.0607558	-0.280344	0
ENSG00000100393	2033	EP300	E1A binding protein p300	2	2	0.090428	0.683961	1	0.0621964	0.35481	0	0.575331	0.0387488	0
ENSG00000100796	55671	PPP4R3A	protein phosphatase 4 regulatory subunit 3A	2	2	0.0312733	0.612084	1	0.0188072	0.265775	0	0.152939	-0.118756	0
ENSG00000100823	328	APEX1	apurinic/apyrimidinic endodeoxyribonuclease 1	2	2	0.0242197	0.595898	1	0.0332382	0.434544	0	0.0674541	0.246359	0
ENSG00000100852	394	ARHGAP5	Rho GTPase activating protein 5	2	2	0.0257089	0.820562	1	0.0515644	0.0663391	0	0.315677	0.0706232	0
ENSG00000100916	84312	BRMS1L	BRMS1 like transcriptional repressor	2	2	0.00259139	0.677723	1	0.171406	0.130551	0	0.0498767	-0.3229	0
ENSG00000100949	5875	RABGGTA	Rab geranylgeranyltransferase subunit alpha	2	2	0.0477331	0.768457	1	0.0381103	0.468353	0	0.0533462	-0.270552	0
ENSG00000101104	80336	PABPC1L	poly(A) binding protein cytoplasmic 1 like	2	2	0.0673846	0.915773	1	0.0598211	0.28139	0	0.027943	-0.518861	0
ENSG00000101189	55257	MRGBP	MRG domain binding protein	2	2	0.0352814	0.643524	1	0.0269338	0.290809	0	0.02643	0.427154	0
ENSG00000101811	1478	CSTF2	cleavage stimulation factor subunit 2	2	2	0.0330695	0.751199	1	0.00900388	0.489308	0	0.0466422	-0.397788	0
ENSG00000101940	64743	WDR13	WD repeat domain 13	2	2	0.0285161	0.885695	1	0.0154453	0.394123	0	0.0658054	-0.353524	0
ENSG00000101945	6839	SUV39H1	suppressor of variegation 3-9 homolog 1	2	2	0.0763989	0.599965	1	0.966867	-0.00187819	0	0.0435711	-0.57509	0
ENSG00000101972	10735	STAG2	stromal antigen 2	2	2	0.010659	0.753773	1	0.170872	0.0342941	0	0.59186	-0.0154148	0
ENSG00000102096	11040	PIM2	Pim-2 proto-oncogene, serine/threonine kinase	2	2	0.00715685	1.91478	1	0.00750529	0.424928	0	0.00706845	-0.405433	0
ENSG00000102103	10084	PQBP1	polyglutamine binding protein 1	2	2	0.022132	0.64192	1	0.0892181	0.348965	0	0.0696244	-0.463483	0
ENSG00000102226	8237	USP11	ubiquitin specific peptidase 11	2	2	0.0164384	0.957885	1	0.0356062	0.243152	0	0.402166	0.0301221	0
ENSG00000102974	10664	CTCF	CCCTC-binding factor	2	2	0.00274135	0.840204	1	0.00533698	0.47589	0	0.0073638	-0.370927	0
ENSG00000103495	4150	MAZ	MYC associated zinc finger protein	2	2	0.0142957	0.711467	1	0.00456087	-0.546208	0	0.0200743	-0.569768	0
ENSG00000104872	55011	PIH1D1	PIH1 domain containing 1	2	2	0.0100069	0.883247	1	0.0255056	0.426948	0	0.178371	-0.0726905	0
ENSG00000104957	81576	CCDC130	coiled-coil domain containing 130	2	2	0.0235166	0.683617	1	0.121176	0.178193	0	0.0745607	-0.183231	0
ENSG00000105127	10270	AKAP8	A-kinase anchoring protein 8	2	2	0.00889626	0.939253	1	0.0305572	0.578142	0	0.0446441	-0.227158	0
ENSG00000105204	9149	DYRK1B	dual specificity tyrosine phosphorylation regulated kinase 1B	2	2	0.0805346	0.623601	1	0.0855429	-0.29986	0	0.179852	-0.295253	0
ENSG00000105229	51588	PIAS4	protein inhibitor of activated STAT 4	2	2	0.000303105	0.977208	1	0.0172422	0.35513	0	0.00984739	-0.542665	0
ENSG00000105290	333	APLP1	amyloid beta precursor like protein 1	2	2	0.00526164	1.09066	1	0.0638941	0.216285	0	0.0541272	0.203415	0
ENSG00000105329	7040	TGFB1	transforming growth factor beta 1	2	2	0.0782698	0.86724	1	0.287705	0.0821645	0	0.154951	-0.44799	0
ENSG00000105671	54555	DDX49	DEAD-box helicase 49	2	2	0.0245238	0.716415	1	0.140144	-0.155535	0	0.0304677	-0.446826	0
ENSG00000105771	56006	SMG9	SMG9 nonsense mediated mRNA decay factor	2	2	0.0227048	0.632615	1	0.0129123	0.472464	0	0.311028	-0.0661693	0
ENSG00000105856	26959	HBP1	HMG-box transcription factor 1	2	2	0.0185543	1.27368	1	0.219191	0.0529314	0	0.021579	-0.443328	0
ENSG00000105866	6671	SP4	Sp4 transcription factor	2	2	0.0198901	0.584282	1	0.0766392	-0.17391	0	0.352444	0.0590276	0
ENSG00000106009	221927	BRAT1	BRCA1 associated ATM activator 1	2	2	0.02546	0.82578	1	0.0525085	0.504365	0	0.101802	-0.251322	0
ENSG00000106299	8976	WASL	WASP like actin nucleation promoting factor	2	2	0.0515155	0.7421	1	0.0300129	0.475399	0	0.124115	-0.330061	0
ENSG00000106415	113263	GLCCI1	glucocorticoid induced 1	2	2	0.0405333	0.858721	1	0.0171997	0.299862	0	0.0337502	-0.324162	0
ENSG00000107262	573	BAG1	BCL2 associated athanogene 1	2	2	0.0365501	0.606785	1	0.0152345	0.48181	0	0.0339114	0.393679	0
ENSG00000107815	56652	TWNK	twinkle mtDNA helicase	2	2	0.00838744	0.992852	1	0.00248377	0.572007	0	0.0177297	-0.546808	0
ENSG00000107968	1326	MAP3K8	mitogen-activated protein kinase kinase kinase 8	2	2	0.0260316	1.51632	1	0.0277893	0.314671	0	0.173444	0.0687814	0
ENSG00000108064	7019	TFAM	transcription factor A, mitochondrial	2	2	0.0147064	1.02731	1	0.00999788	0.518262	0	0.0212957	-0.289866	0
ENSG00000108175	57178	ZMIZ1	zinc finger MIZ-type containing 1	2	2	0.0218721	0.747898	1	0.595259	0.0519197	0	0.0797957	-0.437578	0
ENSG00000108306	84961	FBXL20	F-box and leucine rich repeat protein 20	2	2	0.0285704	0.638745	1	0.128943	0.0372321	0	0.0785879	0.0986786	0
ENSG00000108465	80279	CDK5RAP3	CDK5 regulatory subunit associated protein 3	2	2	0.0924839	0.686222	1	0.0370249	0.320329	0	0.0583227	-0.255214	0
ENSG00000108963	1801	DPH1	diphthamide biosynthesis 1	2	2	0.00152011	0.590177	1	0.0686348	0.267155	0	0.0380699	-0.318918	0
ENSG00000109220	26511	CHIC2	cysteine rich hydrophobic domain 2	2	2	0.0153557	1.49721	1	0.0119633	0.389214	0	0.0687336	-0.295043	0
ENSG00000110514	8567	MADD	MAP kinase activating death domain	2	2	0.0038675	0.823975	1	0.037418	0.0646598	0	0.571246	0.010378	0
ENSG00000111540	5869	RAB5B	RAB5B, member RAS oncogene family	2	2	0.0162694	0.586417	1	0.0425563	0.0751652	0	0.0169614	-0.577276	0
ENSG00000111615	11103	KRR1	KRR1 small subunit processome component homolog	2	2	0.0034723	0.991869	1	0.0293696	0.402812	0	0.0435215	-0.183929	0
ENSG00000111678	113246	C12orf57	chromosome 12 open reading frame 57	2	2	0.0189607	0.754882	1	0.00908169	0.485556	0	0.0575543	0.13863	0
ENSG00000112234	26235	FBXL4	F-box and leucine rich repeat protein 4	2	2	0.0380332	0.668081	1	0.0468103	-0.207666	0	0.56997	-0.0346016	0
ENSG00000113013	3313	HSPA9	heat shock protein family A (Hsp70) member 9	2	2	0.00586415	0.74456	1	0.0274135	-0.248941	0	0.0934827	0.0245518	0
ENSG00000113119	55374	TMCO6	transmembrane and coiled-coil domains 6	2	2	0.0523026	0.733048	1	0.0423961	0.516955	0	0.147109	0.131	0
ENSG00000113240	57396	CLK4	CDC like kinase 4	2	2	0.00529781	1.12401	1	0.122655	0.337437	0	0.0326833	-0.516757	0
ENSG00000113580	2908	NR3C1	nuclear receptor subfamily 3 group C member 1	2	2	0.00925618	1.53739	1	0.0606471	0.166917	0	0.136768	-0.133641	0
ENSG00000114626	80325	ABTB1	ankyrin repeat and BTB domain containing 1	2	2	0.019419	1.50141	1	0.0284342	0.396317	0	0.191061	-0.0391614	0
ENSG00000114739	93	ACVR2B	activin A receptor type 2B	2	2	0.00707357	1.39902	1	0.00746577	0.566139	0	0.0655674	0.0782726	0
ENSG00000114982	55683	KANSL3	KAT8 regulatory NSL complex subunit 3	2	2	0.019704	0.741325	1	0.677955	-0.0289977	0	0.0253319	-0.563949	0
ENSG00000114993	6242	RTKN	rhotekin	2	2	0.0280619	0.846071	1	0.192644	-0.103754	0	0.0463742	-0.197069	0
ENSG00000115421	64895	PAPOLG	poly(A) polymerase gamma	2	2	0.0234629	0.626849	1	0.0370161	0.299036	0	0.062759	-0.288978	0
ENSG00000115816	10153	CEBPZ	CCAAT enhancer binding protein zeta	2	2	0.0172966	0.769939	1	0.0586831	0.494472	0	0.169827	-0.144627	0
ENSG00000116095	65977	PLEKHA3	pleckstrin homology domain containing A3	2	2	0.0156505	0.932559	1	0.0138991	0.545748	0	0.0340517	-0.422117	0
ENSG00000116514	127544	RNF19B	ring finger protein 19B	2	2	0.0253093	1.18008	1	0.0485351	0.503992	0	0.186959	-0.142385	0
ENSG00000116604	4209	MEF2D	myocyte enhancer factor 2D	2	2	0.00963091	0.773937	1	0.0129575	-0.182744	0	0.0123357	-0.319022	0
ENSG00000116698	9887	SMG7	SMG7 nonsense mediated mRNA decay factor	2	2	0.00280152	0.591842	1	0.101151	-0.273488	0	0.0703125	-0.314736	0
ENSG00000116747	6738	RO60	Ro60, Y RNA binding protein	2	2	0.0309003	0.724311	1	0.102965	0.185716	0	0.0466674	-0.548028	0
ENSG00000117597	27042	UTP25	UTP25 small subunit processor component	2	2	0.00764608	1.11292	1	0.00694143	0.381077	0	0.191288	-0.0563545	0
ENSG00000117616	57035	RSRP1	arginine and serine rich protein 1	2	2	0.0883442	0.616201	1	0.168547	-0.170097	0	0.0343176	-0.413577	0
ENSG00000117877	10849	CD3EAP	CD3e molecule associated protein	2	2	0.0183994	1.11307	1	0.0323342	0.327711	0	0.0634317	-0.410048	0
ENSG00000118200	23271	CAMSAP2	calmodulin regulated spectrin associated protein family member 2	2	2	0.0437833	0.727657	1	0.096653	0.283525	0	0.200971	-0.209336	0
ENSG00000118965	57539	WDR35	WD repeat domain 35	2	2	0.0113709	0.584744	1	0.0097096	0.450945	0	0.0486803	-0.19941	0
ENSG00000119396	51552	RAB14	RAB14, member RAS oncogene family	2	2	0.0313926	0.707202	1	0.521723	0.0897045	0	0.0899072	-0.558235	0
ENSG00000119537	2531	KDSR	3-ketodihydrosphingosine reductase	2	2	0.0141755	1.23993	1	0.0190944	0.282395	0	0.043672	-0.444431	0
ENSG00000119681	4053	LTBP2	latent transforming growth factor beta binding protein 2	2	2	0.0309333	1.16307	1	0.0913799	0.374149	0	0.0237129	-0.38512	0
ENSG00000119686	55640	FLVCR2	feline leukemia virus subgroup C cellular receptor family member 2	2	2	0.0216179	0.609991	1	0.793407	-0.00528411	0	0.0463232	-0.324489	0
ENSG00000120159	79886	CAAP1	caspase activity and apoptosis inhibitor 1	2	2	0.0323469	0.585221	1	0.076524	0.191461	0	0.0202512	-0.50591	0
ENSG00000120616	80314	EPC1	enhancer of polycomb homolog 1	2	2	0.00907287	0.748709	1	0.0880235	0.179382	0	0.43765	-0.00763519	0
ENSG00000120647	84318	CCDC77	coiled-coil domain containing 77	2	2	0.00894566	0.829429	1	0.0290254	0.432536	0	0.0330842	0.423332	0
ENSG00000120699	11340	EXOSC8	exosome component 8	2	2	0.0472361	0.603403	1	0.308884	0.101758	0	0.176905	-0.0633189	0
ENSG00000122140	51116	MRPS2	mitochondrial ribosomal protein S2	2	2	0.0248068	0.714403	1	0.0262779	0.421456	0	0.444819	-0.0623822	0
ENSG00000122678	27434	POLM	DNA polymerase mu	2	2	0.00962474	0.776246	1	0.0407082	0.571788	0	0.164358	-0.0781617	0
ENSG00000123870	7696	ZNF137P	zinc finger protein 137, pseudogene	2	2	0.0381092	0.741801	1	0.974071	0.00221131	0	0.0644386	-0.224053	0
ENSG00000124074	84080	ENKD1	enkurin domain containing 1	2	2	0.018615	1.39232	1	0.109361	0.462485	0	0.0569988	-0.44564	0
ENSG00000124151	8202	NCOA3	nuclear receptor coactivator 3	2	2	0.0447452	0.594515	1	0.0274118	0.351976	0	0.015835	-0.297795	0
ENSG00000124217	27304	MOCS3	molybdenum cofactor synthesis 3	2	2	0.0218765	0.637176	1	0.0330247	0.451398	0	0.0658326	-0.132436	0
ENSG00000124788	6310	ATXN1	ataxin 1	2	2	0.0462638	0.660716	1	0.00730593	-0.334025	0	0.0192735	-0.489126	0
ENSG00000124813	860	RUNX2	RUNX family transcription factor 2	2	2	0.0471974	0.797804	1	0.0858917	0.551123	0	0.498721	-0.13657	0
ENSG00000125149	80262	C16orf70	chromosome 16 open reading frame 70	2	2	0.0294974	0.622951	1	0.0248343	0.372868	0	0.0400573	-0.348701	0
ENSG00000125319	78995	HROB	homologous recombination factor with OB-fold	2	2	0.0110217	0.788274	1	0.396662	-0.071875	0	0.0191087	-0.276812	0
ENSG00000125484	9329	GTF3C4	general transcription factor IIIC subunit 4	2	2	0.0212304	0.748917	1	0.0522759	0.380647	0	0.0542511	-0.302825	0
ENSG00000125734	56927	GPR108	G protein-coupled receptor 108	2	2	0.00283857	0.979849	1	0.0778278	0.168963	0	0.0109727	-0.444627	0
ENSG00000126062	11070	TMEM115	transmembrane protein 115	2	2	0.0261882	0.773221	1	0.0113733	0.405254	0	0.0393848	-0.538473	0
ENSG00000126746	171017	ZNF384	zinc finger protein 384	2	2	0.0341741	0.73447	1	0.0174667	0.354216	0	0.385089	0.0657364	0
ENSG00000126804	22890	ZBTB1	zinc finger and BTB domain containing 1	2	2	0.0587992	0.640503	1	0.0374813	0.477929	0	0.17395	0.206503	0
ENSG00000126903	8273	SLC10A3	solute carrier family 10 member 3	2	2	0.028111	0.601172	1	0.0283904	0.511812	0	0.425373	-0.0616248	0
ENSG00000127334	8445	DYRK2	dual specificity tyrosine phosphorylation regulated kinase 2	2	2	0.0221048	0.749463	1	0.0445106	-0.45245	0	0.148423	-0.191796	0
ENSG00000127837	14	AAMP	angio associated migratory cell protein	2	2	0.0114412	0.67539	1	0.0144824	0.375949	0	0.0315457	-0.304893	0
ENSG00000128159	85378	TUBGCP6	tubulin gamma complex associated protein 6	2	2	0.00721613	0.649834	1	0.0394986	0.363837	0	0.0198409	-0.550518	0
ENSG00000128585	4289	MKLN1	muskelin 1	2	2	0.0362687	1.16057	1	0.0919194	0.22892	0	0.0589801	-0.520945	0
ENSG00000128641	4430	MYO1B	myosin IB	2	2	0.0196085	0.717103	1	0.012346	0.376666	0	0.00175794	0.364661	0
ENSG00000129028	56906	THAP10	THAP domain containing 10	2	2	0.0115155	0.625679	1	0.721732	-0.0114987	0	0.0527073	-0.231915	0
ENSG00000129315	904	CCNT1	cyclin T1	2	2	0.0217084	0.957468	1	0.0333961	0.451126	0	0.0372608	-0.431388	0
ENSG00000129667	79651	RHBDF2	rhomboid 5 homolog 2	2	2	0.00191055	1.20919	1	0.00604869	0.535095	0	0.0139331	-0.299197	0
ENSG00000129933	23383	MAU2	MAU2 sister chromatid cohesion factor	2	2	0.00746295	0.864519	1	0.0761242	0.148121	0	0.0203871	-0.385159	0
ENSG00000130349	51250	MTRES1	mitochondrial transcription rescue factor 1	2	2	0.0077156	0.663984	1	0.0532309	0.469838	0	0.0187066	-0.329993	0
ENSG00000130559	157922	CAMSAP1	calmodulin regulated spectrin associated protein 1	2	2	0.00741496	0.591415	1	0.0629116	0.489794	0	0.193413	0.108948	0
ENSG00000130589	85441	HELZ2	helicase with zinc finger 2	2	2	0.0321209	0.691025	1	0.587294	-0.0480177	0	0.0631247	-0.389013	0
ENSG00000130766	83667	SESN2	sestrin 2	2	2	0.0158774	0.932252	1	0.0649829	-0.399794	0	0.191694	-0.1123	0
ENSG00000131080	60401	EDA2R	ectodysplasin A2 receptor	2	2	0.0160176	0.880815	1	0.0206126	0.225363	0	0.0329483	0.118371	0
ENSG00000131115	7770	ZNF227	zinc finger protein 227	2	2	0.00990579	0.658638	1	0.00594407	0.461716	0	0.0184291	-0.215373	0
ENSG00000131368	64432	MRPS25	mitochondrial ribosomal protein S25	2	2	0.0584106	0.608965	1	0.0229598	0.418033	0	0.1884	-0.126978	0
ENSG00000131931	55145	THAP1	THAP domain containing 1	2	2	0.0284845	0.781198	1	0.0534054	0.403083	0	0.0777382	-0.307939	0
ENSG00000132017	90379	DCAF15	DDB1 and CUL4 associated factor 15	2	2	0.0638096	0.643387	1	0.00695131	0.493655	0	0.100217	0.396237	0
ENSG00000132510	23135	KDM6B	lysine demethylase 6B	2	2	0.00380434	1.49085	1	0.140454	0.188213	0	0.0216113	-0.556195	0
ENSG00000132535	1742	DLG4	discs large MAGUK scaffold protein 4	2	2	0.00144778	1.1605	1	0.0388013	0.491975	0	0.134299	0.120673	0
ENSG00000132906	842	CASP9	caspase 9	2	2	0.0126408	0.912174	1	0.0797165	0.352647	0	0.01357	-0.496568	0
ENSG00000132952	10208	USPL1	ubiquitin specific peptidase like 1	2	2	0.0120582	0.770314	1	0.948128	-0.00325954	0	0.0336346	-0.479825	0
ENSG00000133316	54663	WDR74	WD repeat domain 74	2	2	0.0468454	1.05514	1	0.0142632	0.39847	0	0.0102054	-0.38493	0
ENSG00000134108	55207	ARL8B	ADP ribosylation factor like GTPase 8B	2	2	0.0343746	0.630166	1	0.0128957	0.562956	0	0.0814538	-0.288298	0
ENSG00000135070	81689	ISCA1	iron-sulfur cluster assembly 1	2	2	0.0145529	0.83011	1	0.0840365	0.222187	0	0.20058	-0.0807375	0
ENSG00000135446	1019	CDK4	cyclin dependent kinase 4	2	2	0.00899224	0.603288	1	0.01234	0.268437	0	0.0391937	0.110652	0
ENSG00000135655	9958	USP15	ubiquitin specific peptidase 15	2	2	0.0106117	0.626963	1	0.0209621	0.456604	0	0.12544	-0.0979192	0
ENSG00000135999	26122	EPC2	enhancer of polycomb homolog 2	2	2	0.0117535	1.19845	1	0.0452661	0.488718	0	0.0462556	-0.23272	0
ENSG00000136271	54606	DDX56	DEAD-box helicase 56	2	2	0.0504257	0.595124	1	0.00111344	0.461584	0	0.277302	-0.0328874	0
ENSG00000136826	9314	KLF4	Kruppel like factor 4	2	2	0.0669965	0.766094	1	0.108776	-0.386892	0	0.0977059	-0.37	0
ENSG00000137413	129685	TAF8	TATA-box binding protein associated factor 8	2	2	0.0231418	0.671988	1	0.0177152	0.393622	0	0.0103866	-0.51996	0
ENSG00000137575	6386	SDCBP	syndecan binding protein	2	2	0.0522119	1.33938	1	0.0440857	0.469251	0	0.145455	-0.498556	0
ENSG00000137760	91801	ALKBH8	alkB homolog 8, tRNA methyltransferase	2	2	0.0311912	0.629982	1	0.0466337	0.564692	0	0.0225369	-0.417682	0
ENSG00000137776	79811	SLTM	SAFB like transcription modulator	2	2	0.00198324	0.581496	1	0.0436027	0.40339	0	0.0689721	-0.209211	0
ENSG00000137876	51187	RSL24D1	ribosomal L24 domain containing 1	2	2	0.00538338	0.723372	1	0.287659	0.0413189	0	0.0844169	0.124647	0
ENSG00000138378	6775	STAT4	signal transducer and activator of transcription 4	2	2	0.011286	0.700816	1	0.483444	-0.0921848	0	0.208828	0.0867919	0
ENSG00000138434	6744	ITPRID2	ITPR interacting domain containing 2	2	2	0.0156637	0.803483	1	0.0111022	0.537432	0	0.00446754	-0.536114	0
ENSG00000138442	55759	WDR12	WD repeat domain 12	2	2	0.0183013	0.691374	1	0.00449771	0.527604	0	0.0564382	-0.0315538	0
ENSG00000138600	84888	SPPL2A	signal peptide peptidase like 2A	2	2	0.0253391	0.641254	1	0.176767	0.114731	0	0.0611549	-0.403909	0
ENSG00000138604	26035	GLCE	glucuronic acid epimerase	2	2	0.0102078	0.909357	1	0.0101046	0.403726	0	0.0202726	-0.485126	0
ENSG00000138767	246175	CNOT6L	CCR4-NOT transcription complex subunit 6 like	2	2	0.0046452	0.931098	1	0.0450787	0.173343	0	0.00837474	-0.526687	0
ENSG00000140829	9785	DHX38	DEAH-box helicase 38	2	2	0.000802929	0.662264	1	0.0382488	0.290026	0	0.0864017	-0.133564	0
ENSG00000140830	54957	TXNL4B	thioredoxin like 4B	2	2	0.00911062	0.802864	1	0.122863	-0.0685356	0	0.0178761	-0.330836	0
ENSG00000140945	1012	CDH13	cadherin 13	2	2	0.00914061	0.869685	1	0.0284208	-0.310925	0	0.0298132	0.103427	0
ENSG00000140948	23174	ZCCHC14	zinc finger CCHC-type containing 14	2	2	0.00366055	0.709007	1	0.0330051	0.510858	0	0.0456194	-0.312765	0
ENSG00000141526	9123	SLC16A3	solute carrier family 16 member 3	2	2	0.0164183	0.589862	1	0.262995	-0.0417364	0	0.0493894	-0.226144	0
ENSG00000141644	4152	MBD1	methyl-CpG binding domain protein 1	2	2	0.00468649	0.886448	1	0.0455632	0.346583	0	0.0137634	-0.497172	0
ENSG00000141699	162427	RETREG3	reticulophagy regulator family member 3	2	2	0.0219977	0.679715	1	0.104636	0.217224	0	0.0534169	-0.317865	0
ENSG00000141965	55527	FEM1A	fem-1 homolog A	2	2	0.014645	0.753668	1	0.0354815	0.578709	0	0.0198673	-0.532518	0
ENSG00000141994	56931	DUS3L	dihydrouridine synthase 3 like	2	2	0.0331244	0.774622	1	0.0264631	0.337756	0	0.117484	0.126452	0
ENSG00000142330	11132	CAPN10	calpain 10	2	2	0.0149185	0.749279	1	0.0278199	0.44681	0	0.019762	-0.555346	0
ENSG00000143190	5451	POU2F1	POU class 2 homeobox 1	2	2	0.0672855	0.80154	1	0.0498245	-0.14058	0	0.109999	-0.268175	0
ENSG00000143224	5498	PPOX	protoporphyrinogen oxidase	2	2	0.0102384	0.595677	1	0.0243864	-0.476844	0	0.0122225	-0.569576	0
ENSG00000143258	27005	USP21	ubiquitin specific peptidase 21	2	2	0.0448823	0.629047	1	0.0199109	0.280268	0	0.0490166	-0.572599	0
ENSG00000143319	81875	ISG20L2	interferon stimulated exonuclease gene 20 like 2	2	2	0.0350069	0.749274	1	0.047795	0.558218	0	0.0419603	-0.538023	0
ENSG00000143793	79169	C1orf35	chromosome 1 open reading frame 35	2	2	0.064542	0.582993	1	0.320059	0.0902611	0	0.0563627	-0.277644	0
ENSG00000144228	339745	SPOPL	speckle type BTB/POZ protein like	2	2	0.0196514	0.674541	1	0.0748583	-0.242122	0	0.0633213	-0.286105	0
ENSG00000144504	51281	ANKMY1	ankyrin repeat and MYND domain containing 1	2	2	0.01946	0.896627	1	0.0746523	0.31249	0	0.0611385	-0.285817	0
ENSG00000144724	5793	PTPRG	protein tyrosine phosphatase receptor type G	2	2	0.0526106	0.751513	1	0.0697433	0.47502	0	0.085015	-0.251791	0
ENSG00000145041	9730	DCAF1	DDB1 and CUL4 associated factor 1	2	2	0.0299442	0.671528	1	0.0160639	0.335936	0	0.0649271	-0.201605	0
ENSG00000145191	8893	EIF2B5	eukaryotic translation initiation factor 2B subunit epsilon	2	2	0.0148377	0.585972	1	0.0347295	0.454512	0	0.736223	0.0142637	0
ENSG00000145623	9180	OSMR	oncostatin M receptor	2	2	0.0167445	1.0583	1	0.0634123	0.391518	0	0.104479	-0.3204	0
ENSG00000145675	5295	PIK3R1	phosphoinositide-3-kinase regulatory subunit 1	2	2	0.0162105	0.790581	1	0.0243963	0.16932	0	0.0482399	-0.295371	0
ENSG00000145907	10146	G3BP1	G3BP stress granule assembly factor 1	2	2	0.0163096	0.744033	1	0.00753758	0.301388	0	0.0293005	-0.432713	0
ENSG00000146830	64599	GIGYF1	GRB10 interacting GYF protein 1	2	2	0.0278723	0.914333	1	0.0214564	0.570973	0	0.0745909	-0.16932	0
ENSG00000147439	55909	BIN3	bridging integrator 3	2	2	0.00904852	0.732754	1	0.0219674	0.457009	0	0.0355713	-0.24608	0
ENSG00000147789	7553	ZNF7	zinc finger protein 7	2	2	0.00690173	0.653365	1	0.0235482	0.432008	0	0.176324	-0.0667708	0
ENSG00000148229	54107	POLE3	DNA polymerase epsilon 3, accessory subunit	2	2	0.0181131	0.615209	1	0.0114774	0.48265	0	0.04915	0.254563	0
ENSG00000148737	6934	TCF7L2	transcription factor 7 like 2	2	2	0.0637216	0.587564	1	0.0138045	0.438236	0	0.181833	-0.114692	0
ENSG00000148824	92170	MTG1	mitochondrial ribosome associated GTPase 1	2	2	0.0146457	0.901345	1	0.0339206	0.33041	0	0.01112	-0.420672	0
ENSG00000148848	8038	ADAM12	ADAM metallopeptidase domain 12	2	2	0.00741267	2.0019	1	0.0149437	-0.456832	0	0.0139931	-0.45183	0
ENSG00000149016	64852	TUT1	terminal uridylyl transferase 1, U6 snRNA-specific	2	2	0.0255526	0.754724	1	0.158511	0.25857	0	0.0627971	-0.445189	0
ENSG00000149136	6749	SSRP1	structure specific recognition protein 1	2	2	0.00459263	1.19707	1	0.0314959	0.146565	0	0.00858892	-0.540319	0
ENSG00000149231	79780	CCDC82	coiled-coil domain containing 82	2	2	0.0210409	0.585975	1	0.0357915	0.549595	0	0.063268	0.182563	0
ENSG00000149308	4863	NPAT	nuclear protein, coactivator of histone transcription	2	2	0.0366207	0.660368	1	0.000855505	0.487532	0	0.186261	0.0544337	0
ENSG00000150455	114609	TIRAP	TIR domain containing adaptor protein	2	2	0.0129532	0.712061	1	0.0915466	0.342655	0	0.0247119	-0.161558	0
ENSG00000150756	134145	ATPSCKMT	ATP synthase c subunit lysine N-methyltransferase	2	2	0.0491201	0.606056	1	0.0714282	0.429707	0	0.0570341	-0.512441	0
ENSG00000151292	1456	CSNK1G3	casein kinase 1 gamma 3	2	2	0.0209492	0.602532	1	0.022629	0.296311	0	0.0626247	-0.267671	0
ENSG00000152413	9456	HOMER1	homer scaffold protein 1	2	2	0.0119723	1.74793	1	0.00480787	0.423236	0	0.248069	0.114568	0
ENSG00000152443	284309	ZNF776	zinc finger protein 776	2	2	0.0231381	0.608107	1	0.5544	0.0247137	0	0.0574241	-0.296837	0
ENSG00000152457	64421	DCLRE1C	DNA cross-link repair 1C	2	2	0.036488	0.635003	1	0.108013	0.156204	0	0.0617841	-0.325911	0
ENSG00000153487	3621	ING1	inhibitor of growth family member 1	2	2	0.0116637	0.983238	1	0.0199661	0.430934	0	0.0744374	0.152146	0
ENSG00000154144	84897	TBRG1	transforming growth factor beta regulator 1	2	2	0.0279815	0.903567	1	0.030708	0.410462	0	0.0363543	-0.0802206	0
ENSG00000154803	201163	FLCN	folliculin	2	2	0.0081632	0.790763	1	0.0496897	0.504186	0	0.198062	-0.142361	0
ENSG00000155099	55529	PIP4P2	phosphatidylinositol-4,5-bisphosphate 4-phosphatase 2	2	2	0.00857992	1.51008	1	0.0452985	0.385963	0	0.0276427	-0.548402	0
ENSG00000156858	78994	PRR14	proline rich 14	2	2	0.0214398	0.813877	1	0.0951371	0.398432	0	0.0271519	-0.528494	0
ENSG00000156983	7862	BRPF1	bromodomain and PHD finger containing 1	2	2	0.0201831	0.71576	1	0.00903511	0.523109	0	0.0106131	-0.362819	0
ENSG00000157540	1859	DYRK1A	dual specificity tyrosine phosphorylation regulated kinase 1A	2	2	0.0264243	0.625886	1	0.00150582	0.405196	0	0.118154	-0.157812	0
ENSG00000157741	254048	UBN2	ubinuclein 2	2	2	0.0678356	0.856681	1	0.0804178	0.234103	0	0.0982502	-0.238659	0
ENSG00000157881	55229	PANK4	pantothenate kinase 4 (inactive)	2	2	0.0105547	0.684792	1	0.0249444	0.556184	0	0.0212803	-0.361355	0
ENSG00000158006	5051	PAFAH2	platelet activating factor acetylhydrolase 2	2	2	0.0189585	0.634491	1	0.0774042	0.381965	0	0.127216	-0.174612	0
ENSG00000158615	84919	PPP1R15B	protein phosphatase 1 regulatory subunit 15B	2	2	0.0124208	0.884118	1	0.00778176	0.539724	0	0.0283273	-0.463164	0
ENSG00000158636	56946	EMSY	EMSY transcriptional repressor, BRCA2 interacting	2	2	0.0259624	0.695599	1	0.006503	0.35683	0	0.0368045	-0.219645	0
ENSG00000159128	3460	IFNGR2	interferon gamma receptor 2	2	2	0.012458	0.812468	1	0.253516	0.070151	0	0.0316934	-0.541271	0
ENSG00000160058	55108	BSDC1	BSD domain containing 1	2	2	0.0149749	0.629698	1	0.0321316	0.301937	0	0.0353396	-0.240816	0
ENSG00000160113	2063	NR2F6	nuclear receptor subfamily 2 group F member 6	2	2	0.00138444	0.792148	1	0.0244236	0.531556	0	0.02803	-0.413639	0
ENSG00000160803	56893	UBQLN4	ubiquilin 4	2	2	0.00958592	0.787596	1	0.00538532	0.370971	0	0.00164291	-0.436352	0
ENSG00000160813	221908	PPP1R35	protein phosphatase 1 regulatory subunit 35	2	2	0.0317364	0.929697	1	0.00931845	0.354874	0	0.0301805	-0.532909	0
ENSG00000160908	84124	ZNF394	zinc finger protein 394	2	2	0.0380752	0.608352	1	0.0190108	0.394633	0	0.100118	-0.24157	0
ENSG00000160917	10898	CPSF4	cleavage and polyadenylation specific factor 4	2	2	0.043425	0.682325	1	0.0539603	0.557088	0	0.0457262	-0.478614	0
ENSG00000160957	9401	RECQL4	RecQ like helicase 4	2	2	0.00576253	1.31263	1	0.0241383	0.261301	0	0.0106826	-0.529266	0
ENSG00000161010	51149	MRNIP	MRN complex interacting protein	2	2	0.0248331	0.703284	1	0.58208	0.0441446	0	0.100237	-0.268632	0
ENSG00000161204	55324	ABCF3	ATP binding cassette subfamily F member 3	2	2	0.0185221	0.803823	1	0.0217029	0.473817	0	0.117995	-0.0934684	0
ENSG00000162086	7627	ZNF75A	zinc finger protein 75a	2	2	0.00168437	0.956322	1	0.0445131	0.511718	0	0.0128585	-0.306657	0
ENSG00000162129	81570	CLPB	ClpB homolog, mitochondrial AAA ATPase chaperonin	2	2	0.0272955	0.663676	1	0.033889	0.323853	0	0.0392862	-0.537287	0
ENSG00000162241	283130	SLC25A45	solute carrier family 25 member 45	2	2	0.0183246	0.580119	1	0.413746	-0.0332266	0	0.667922	-0.0113991	0
ENSG00000162664	284695	ZNF326	zinc finger protein 326	2	2	0.0121327	0.636854	1	0.114931	0.120612	0	0.0211516	0.412224	0
ENSG00000162729	93185	IGSF8	immunoglobulin superfamily member 8	2	2	0.0262551	0.773788	1	0.242712	0.0330365	0	0.0752399	-0.111943	0
ENSG00000162851	64216	TFB2M	transcription factor B2, mitochondrial	2	2	0.0151403	0.583912	1	0.0253691	0.408898	0	0.105626	-0.110843	0
ENSG00000163138	133015	PACRGL	parkin coregulated like	2	2	0.0188534	0.605131	1	0.617062	0.0263043	0	0.0311503	-0.293418	0
ENSG00000163312	113510	HELQ	helicase, POLQ like	2	2	0.0112504	0.778801	1	0.0296269	0.340598	0	0.0354068	-0.299971	0
ENSG00000163472	84283	TMEM79	transmembrane protein 79	2	2	0.00302929	0.813331	1	0.0874268	-0.291289	0	0.0483887	-0.507578	0
ENSG00000163882	5437	POLR2H	RNA polymerase II subunit H	2	2	0.0336196	0.702149	1	0.0246803	0.508644	0	0.00758874	0.54716	0
ENSG00000163945	57654	UVSSA	UV stimulated scaffold protein A	2	2	0.0107463	0.647187	1	0.0113537	0.394292	0	0.0190593	-0.420606	0
ENSG00000164011	51058	ZNF691	zinc finger protein 691	2	2	0.0430355	0.67495	1	0.057549	0.329619	0	0.0433416	-0.389656	0
ENSG00000164114	79884	MAP9	microtubule associated protein 9	2	2	0.01618	0.72364	1	0.112507	-0.193202	0	0.0328421	-0.555713	0
ENSG00000164300	256987	SERINC5	serine incorporator 5	2	2	0.0044723	0.602219	1	0.153585	0.105212	0	0.117311	-0.137901	0
ENSG00000164548	29896	TRA2A	transformer 2 alpha homolog	2	2	0.0871741	0.724688	1	0.0985438	0.403588	0	0.722687	0.0718949	0
ENSG00000164889	6522	SLC4A2	solute carrier family 4 member 2	2	2	0.00726676	0.778222	1	0.0632691	0.220084	0	0.0739439	-0.111886	0
ENSG00000165175	58526	MID1IP1	MID1 interacting protein 1	2	2	0.0130023	0.834747	1	0.0268116	0.566214	0	0.0424051	-0.224715	0
ENSG00000165195	5277	PIGA	phosphatidylinositol glycan anchor biosynthesis class A	2	2	0.032732	0.587527	1	0.0528631	0.375324	0	0.035813	0.517586	0
ENSG00000165282	84720	PIGO	phosphatidylinositol glycan anchor biosynthesis class O	2	2	0.0151893	0.596397	1	0.871557	0.0122583	0	0.0239861	-0.558588	0
ENSG00000165416	10910	SUGT1	SGT1 homolog, MIS12 kinetochore complex assembly cochaperone	2	2	0.0356958	0.583393	1	0.0527583	0.167281	0	0.0916773	0.190378	0
ENSG00000165417	2957	GTF2A1	general transcription factor IIA subunit 1	2	2	0.0313996	1.22967	1	0.123421	0.364532	0	0.205241	-0.301066	0
ENSG00000165494	51585	PCF11	PCF11 cleavage and polyadenylation factor subunit	2	2	0.014732	0.636563	1	0.123559	0.169237	0	0.123427	-0.108469	0
ENSG00000166002	56935	SMCO4	single-pass membrane protein with coiled-coil domains 4	2	2	0.0373604	1.03812	1	0.0444224	0.474377	0	0.032829	-0.434453	0
ENSG00000166140	84936	ZFYVE19	zinc finger FYVE-type containing 19	2	2	0.0160776	0.678469	1	0.664181	-0.0343633	0	0.0569192	-0.158411	0
ENSG00000166261	7753	ZNF202	zinc finger protein 202	2	2	0.0286981	0.582652	1	0.047648	0.222351	0	0.00586415	-0.260412	0
ENSG00000166394	51700	CYB5R2	cytochrome b5 reductase 2	2	2	0.00902311	1.26498	1	0.0457609	0.541398	0	0.420816	-0.0856033	0
ENSG00000166483	7465	WEE1	WEE1 G2 checkpoint kinase	2	2	0.0128514	1.19749	1	0.785825	-0.0136942	0	0.555184	-0.0343104	0
ENSG00000166783	9665	MARF1	meiosis regulator and mRNA stability factor 1	2	2	0.0477548	0.679609	1	0.143121	0.0987694	0	0.097352	-0.206095	0
ENSG00000166793	219539	YPEL4	yippee like 4	2	2	0.0134368	1.13449	1	0.249144	0.141954	0	0.0351337	-0.565986	0
ENSG00000166848	54386	TERF2IP	TERF2 interacting protein	2	2	0.000444072	1.01258	1	0.0436514	0.564033	0	0.00298624	-0.413943	0
ENSG00000166881	23306	NEMP1	nuclear envelope integral membrane protein 1	2	2	0.0305182	0.611576	1	0.192156	0.0487367	0	0.750175	-0.0160063	0
ENSG00000166886	4665	NAB2	NGFI-A binding protein 2	2	2	0.0127779	0.781843	1	0.00735515	0.535266	0	0.0433476	0.20007	0
ENSG00000166925	81628	TSC22D4	TSC22 domain family member 4	2	2	0.0218349	1.14758	1	0.068189	0.290322	0	0.533199	-0.0646289	0
ENSG00000167173	56905	C15orf39	chromosome 15 open reading frame 39	2	2	0.0920376	0.586915	1	0.127045	0.132056	0	0.794922	-0.037855	0
ENSG00000167182	6668	SP2	Sp2 transcription factor	2	2	0.0148537	0.59005	1	0.100702	0.372242	0	0.108489	-0.310903	0
ENSG00000167522	29123	ANKRD11	ankyrin repeat domain 11	2	2	0.0343373	0.724649	1	0.0974003	0.249225	0	0.0882763	-0.313545	0
ENSG00000167562	55762	ZNF701	zinc finger protein 701	2	2	0.00524894	0.74995	1	0.00548112	0.556296	0	0.0576336	-0.0597395	0
ENSG00000167595	148137	PROSER3	proline and serine rich 3	2	2	0.0235826	1.00891	1	0.0267966	0.424325	0	0.0512715	-0.436723	0
ENSG00000167635	7705	ZNF146	zinc finger protein 146	2	2	0.0118008	0.645609	1	0.0404605	0.444955	0	0.54409	0.0209322	0
ENSG00000167702	90990	KIFC2	kinesin family member C2	2	2	0.0623509	0.800879	1	0.0149407	0.190441	0	0.0171528	-0.243884	0
ENSG00000167962	90850	ZNF598	zinc finger protein 598	2	2	0.04312	0.635156	1	0.0491463	0.504941	0	0.0322334	-0.508747	0
ENSG00000167965	64223	MLST8	MTOR associated protein, LST8 homolog	2	2	0.017491	0.80533	1	0.0234037	0.413939	0	0.0115388	-0.259608	0
ENSG00000168246	92181	UBTD2	ubiquitin domain containing 2	2	2	0.0278799	0.739577	1	0.0547272	0.364689	0	0.723527	0.0258181	0
ENSG00000168763	26505	CNNM3	cyclin and CBS domain divalent metal cation transport mediator 3	2	2	0.00745554	0.924166	1	0.0536366	0.497558	0	0.0434321	0.335174	0
ENSG00000169018	10116	FEM1B	fem-1 homolog B	2	2	0.0203305	0.655599	1	0.0110397	0.331336	0	0.262948	-0.066259	0
ENSG00000169221	26000	TBC1D10B	TBC1 domain family member 10B	2	2	0.0276814	0.615592	1	0.0304201	0.27941	0	0.0211948	-0.54514	0
ENSG00000169359	9197	SLC33A1	solute carrier family 33 member 1	2	2	0.0235206	0.639586	1	0.84014	-0.00784153	0	0.16288	-0.111089	0
ENSG00000169375	25942	SIN3A	SIN3 transcription regulator family member A	2	2	0.0247652	0.837291	1	0.0409169	-0.214543	0	0.0301163	-0.23311	0
ENSG00000169951	92595	ZNF764	zinc finger protein 764	2	2	0.00278687	0.614821	1	0.0496736	0.550638	0	0.0744794	-0.249743	0
ENSG00000169991	126917	IFFO2	intermediate filament family orphan 2	2	2	0.0545921	0.653164	1	0.438397	0.0258476	0	0.0175101	0.362948	0
ENSG00000170142	7324	UBE2E1	ubiquitin conjugating enzyme E2 E1	2	2	0.00927294	0.709058	1	0.108774	-0.157057	0	0.0478469	0.21102	0
ENSG00000170632	83787	ARMC10	armadillo repeat containing 10	2	2	0.0338504	0.633086	1	0.176906	0.173899	0	0.00618331	-0.426191	0
ENSG00000170776	11214	AKAP13	A-kinase anchoring protein 13	2	2	0.0753029	0.869373	1	0.102893	0.360211	0	0.191882	-0.08266	0
ENSG00000170801	94031	HTRA3	HtrA serine peptidase 3	2	2	0.0132101	1.20959	1	0.0336526	0.293614	0	0.176288	0.130509	0
ENSG00000171861	55178	MRM3	mitochondrial rRNA methyltransferase 3	2	2	0.0504428	0.607881	1	0.307984	0.081583	0	0.0934368	-0.0534533	0
ENSG00000171914	83660	TLN2	talin 2	2	2	0.0573199	0.876001	1	0.118051	0.353327	0	0.0850704	-0.36555	0
ENSG00000172432	54676	GTPBP2	GTP binding protein 2	2	2	0.0265767	1.2504	1	0.161393	-0.1561	0	0.115487	-0.246308	0
ENSG00000173020	156	GRK2	G protein-coupled receptor kinase 2	2	2	0.0313811	0.659467	1	0.0235505	0.475341	0	0.125637	0.0449052	0
ENSG00000173210	22885	ABLIM3	actin binding LIM protein family member 3	2	2	0.024741	0.728782	1	0.0189303	0.517871	0	0.221314	0.107131	0
ENSG00000173327	4296	MAP3K11	mitogen-activated protein kinase kinase kinase 11	2	2	0.023262	0.682371	1	0.0243176	0.517422	0	0.0409164	-0.401332	0
ENSG00000173727	0	AP000769.1	Finkel-Biskis-Reilly murine sarcoma virus (FBR-MuSV) ubiquitously expressed (FAU) pseudogene	2	2	0.02332	0.619407	1	0.0163772	-0.491304	0	0.637776	-0.0260034	0
ENSG00000173852	23333	DPY19L1	dpy-19 like C-mannosyltransferase 1	2	2	0.0135887	0.731619	1	0.0145078	0.483009	0	0.0884824	-0.177773	0
ENSG00000173914	83759	RBM4B	RNA binding motif protein 4B	2	2	0.0142613	0.711519	1	0.0799753	0.477803	0	0.9622	-0.00248727	0
ENSG00000174010	80311	KLHL15	kelch like family member 15	2	2	0.00299206	0.78819	1	0.00471665	0.451733	0	0.00159333	-0.363388	0
ENSG00000174151	284613	CYB561D1	cytochrome b561 family member D1	2	2	0.0418126	0.590736	1	0.0195692	0.456763	0	0.108791	-0.18085	0
ENSG00000174173	54931	TRMT10C	tRNA methyltransferase 10C, mitochondrial RNase P subunit	2	2	0.0313629	0.655269	1	0.126645	0.437882	0	0.139897	-0.318869	0
ENSG00000174206	144577	C12orf66	chromosome 12 open reading frame 66	2	2	0.0282779	0.599339	1	0.173332	0.100595	0	0.087955	-0.28302	0
ENSG00000174799	9662	CEP135	centrosomal protein 135	2	2	0.0211734	0.6577	1	0.289157	0.0960992	0	0.0654942	0.301412	0
ENSG00000175087	149420	PDIK1L	PDLIM1 interacting kinase 1 like	2	2	0.0280072	0.60336	1	0.0650115	0.241377	0	0.0417234	-0.459678	0
ENSG00000175938	93129	ORAI3	ORAI calcium release-activated calcium modulator 3	2	2	0.013455	0.599913	1	0.331832	0.0633211	0	0.0686325	-0.12071	0
ENSG00000176248	29882	ANAPC2	anaphase promoting complex subunit 2	2	2	0.0237966	0.785234	1	0.0784241	0.340178	0	0.0367489	-0.43152	0
ENSG00000176933	222699	TOB2P1	transducer of ERBB2, 2 pseudogene 1	2	2	0.0321277	0.778215	1	0.367315	0.165261	0	0.197821	-0.28896	0
ENSG00000177051	23403	FBXO46	F-box protein 46	2	2	0.0471648	0.60426	1	0.0244492	0.410786	0	0.807539	-0.0191674	0
ENSG00000177337	649446	DLGAP1-AS1	DLGAP1 antisense RNA 1	2	2	0.00498447	0.986127	1	0.0289351	0.561917	0	0.0192759	-0.136565	0
ENSG00000177606	3725	JUN	Jun proto-oncogene, AP-1 transcription factor subunit	2	2	0.000171489	1.00976	1	0.0377768	0.464133	0	0.148736	-0.117745	0
ENSG00000178381	90637	ZFAND2A	zinc finger AN1-type containing 2A	2	2	0.0104547	0.759157	1	0.198396	0.0871046	0	0.295427	0.0174164	0
ENSG00000178695	115207	KCTD12	potassium channel tetramerization domain containing 12	2	2	0.0126884	1.86553	1	0.00149824	0.402736	0	0.0301611	-0.50835	0
ENSG00000178700	200895	DHFR2	dihydrofolate reductase 2	2	2	0.00336891	0.777761	1	0.0444162	0.535648	0	0.0520612	-0.115198	0
ENSG00000178913	6879	TAF7	TATA-box binding protein associated factor 7	2	2	0.0201904	0.596703	1	0.0317424	0.385803	0	0.0466988	-0.270088	0
ENSG00000179029	84314	TMEM107	transmembrane protein 107	2	2	0.0332636	0.653486	1	0.1797	0.230523	0	0.890806	0.00550187	0
ENSG00000179094	5187	PER1	period circadian regulator 1	2	2	0.00569884	1.56089	1	0.293357	-0.0505603	0	0.0523874	-0.277265	0
ENSG00000179943	84922	FIZ1	FLT3 interacting zinc finger 1	2	2	0.0108627	0.656541	1	0.0678557	0.394701	0	0.025942	-0.544709	0
ENSG00000180884	126375	ZNF792	zinc finger protein 792	2	2	0.0180725	1.29697	1	0.0432609	0.507439	0	0.0535064	-0.569174	0
ENSG00000181038	124512	METTL23	methyltransferase like 23	2	2	0.0347168	0.582675	1	0.0213829	0.480917	0	0.356209	0.0672458	0
ENSG00000181222	5430	POLR2A	RNA polymerase II subunit A	2	2	0.0575314	0.769727	1	0.271657	-0.263428	0	0.223269	-0.310605	0
ENSG00000181915	84890	ADO	2-aminoethanethiol dioxygenase	2	2	0.00869195	0.74112	1	0.0163125	0.445228	0	0.0129141	-0.493791	0
ENSG00000182208	81532	MOB2	MOB kinase activator 2	2	2	0.0373941	0.596037	1	0.0889654	0.178453	0	0.758151	0.0223824	0
ENSG00000182224	124637	CYB5D1	cytochrome b5 domain containing 1	2	2	0.0481951	0.594302	1	0.0571681	0.394026	0	0.371678	0.0687056	0
ENSG00000182796	440104	TMEM198B	transmembrane protein 198B (pseudogene)	2	2	0.0439547	1.00677	1	0.124407	0.157665	0	0.771871	0.0209534	0
ENSG00000183579	84133	ZNRF3	zinc and ring finger 3	2	2	0.0107525	0.781794	1	0.11805	0.403485	0	0.0822518	-0.543869	0
ENSG00000183624	56941	HMCES	5-hydroxymethylcytosine binding, ES cell specific	2	2	0.033368	0.827228	1	0.0344887	0.32079	0	0.000263232	-0.505256	0
ENSG00000184557	9021	SOCS3	suppressor of cytokine signaling 3	2	2	0.0264988	0.649298	1	0.00745413	-0.23153	0	0.0555953	-0.189889	0
ENSG00000184677	9923	ZBTB40	zinc finger and BTB domain containing 40	2	2	0.00125371	0.84967	1	0.00688303	0.531467	0	0.0145355	-0.343135	0
ENSG00000184857	25880	TMEM186	transmembrane protein 186	2	2	0.0580145	0.672121	1	0.0310559	0.0852508	0	0.0872922	-0.411989	0
ENSG00000185324	8558	CDK10	cyclin dependent kinase 10	2	2	0.0449291	0.664911	1	0.0368851	0.511117	0	0.0571329	-0.36764	0
ENSG00000185507	3665	IRF7	interferon regulatory factor 7	2	2	0.0236293	1.31684	1	0.0158368	0.373818	0	0.129391	-0.209115	0
ENSG00000185875	79896	THNSL1	threonine synthase like 1	2	2	0.00567872	0.769526	1	0.0366916	0.125858	0	0.00464926	0.559757	0
ENSG00000186017	84924	ZNF566	zinc finger protein 566	2	2	0.0127274	0.846053	1	0.0652389	0.237379	0	0.0504395	-0.340254	0
ENSG00000186056	100129196	MATN1-AS1	MATN1 antisense RNA 1	2	2	0.00526076	1.15244	1	0.240668	-0.0517199	0	0.0231854	-0.343476	0
ENSG00000186416	55922	NKRF	NFKB repressing factor	2	2	0.00746665	0.844889	1	0.0186233	0.477094	0	0.0311048	-0.30514	0
ENSG00000186907	349667	RTN4RL2	reticulon 4 receptor like 2	2	2	0.0374561	1.05059	1	0.0927796	-0.291945	0	0.130206	-0.34356	0
ENSG00000187514	5757	PTMA	prothymosin alpha	2	2	0.0140565	0.602513	1	0.620837	-0.0402779	0	0.0269254	0.205229	0
ENSG00000187634	148398	SAMD11	sterile alpha motif domain containing 11	2	2	0.00322883	0.826896	1	0.0265884	0.423308	0	0.0450053	0.265553	0
ENSG00000187954	50626	CYHR1	cysteine and histidine rich 1	2	2	0.0132602	0.587636	1	0.0559023	0.286669	0	0.0280898	-0.551537	0
ENSG00000188167	643853	TMPPE	transmembrane protein with metallophosphoesterase domain	2	2	0.065704	0.584861	1	0.369559	0.164132	0	0.126366	-0.335761	0
ENSG00000188786	4520	MTF1	metal regulatory transcription factor 1	2	2	0.0305247	0.786827	1	0.0524386	0.478198	0	0.000820572	-0.525673	0
ENSG00000189180	7581	ZNF33A	zinc finger protein 33A	2	2	0.0125503	0.59529	1	0.71811	-0.0130859	0	0.103004	0.121126	0
ENSG00000196083	3556	IL1RAP	interleukin 1 receptor accessory protein	2	2	0.00299559	1.34507	1	0.0677034	0.265392	0	0.0194425	-0.393461	0
ENSG00000196290	60491	NIF3L1	NGG1 interacting factor 3 like 1	2	2	0.00624982	0.609456	1	0.129671	0.171696	0	0.0529645	-0.258054	0
ENSG00000196378	80778	ZNF34	zinc finger protein 34	2	2	0.0224716	0.59908	1	0.0692435	-0.409918	0	0.0304608	-0.418245	0
ENSG00000196659	150737	TTC30B	tetratricopeptide repeat domain 30B	2	2	0.026873	0.677244	1	0.110543	-0.27032	0	0.054003	-0.528454	0
ENSG00000196781	7088	TLE1	TLE family member 1, transcriptional corepressor	2	2	0.00847865	0.657561	1	0.0754758	0.0941568	0	0.0248876	0.249615	0
ENSG00000196810	92070	CTBP1-DT	CTBP1 divergent transcript	2	2	0.00366725	0.713902	1	0.0654947	0.355802	0	0.409116	0.0624855	0
ENSG00000196843	10865	ARID5A	AT-rich interaction domain 5A	2	2	0.0096295	1.30458	1	0.0499603	0.440685	0	0.245654	-0.0911777	0
ENSG00000196850	160760	PPTC7	PTC7 protein phosphatase homolog	2	2	0.037561	0.763894	1	0.0790076	0.559975	0	0.208933	0.248432	0
ENSG00000197070	92714	ARRDC1	arrestin domain containing 1	2	2	0.0838444	0.7099	1	0.102429	0.164461	0	0.0507267	-0.288407	0
ENSG00000197557	92104	TTC30A	tetratricopeptide repeat domain 30A	2	2	0.0338285	0.597299	1	0.601653	-0.0281557	0	0.0950831	0.270487	0
ENSG00000197903	85236	H2BC12	H2B clustered histone 12	2	2	0.0298684	0.686034	1	0.0181823	0.413329	0	0.0497673	0.272075	0
ENSG00000197961	7675	ZNF121	zinc finger protein 121	2	2	0.00330434	0.618051	1	0.0212129	0.496576	0	0.0391141	-0.0689296	0
ENSG00000197989	85028	SNHG12	small nucleolar RNA host gene 12	2	2	0.0559958	0.662292	1	0.122506	-0.274645	0	0.0328567	-0.481761	0
ENSG00000198081	7541	ZBTB14	zinc finger and BTB domain containing 14	2	2	0.0242488	0.715691	1	0.681561	-0.0284984	0	0.0681985	-0.203652	0
ENSG00000198276	54963	UCKL1	uridine-cytidine kinase 1 like 1	2	2	0.0412354	0.869957	1	0.00106951	0.497466	0	0.562791	-0.0352052	0
ENSG00000198546	118472	ZNF511	zinc finger protein 511	2	2	0.0417324	0.861896	1	0.0535528	0.577757	0	0.380362	0.139246	0
ENSG00000198795	25925	ZNF521	zinc finger protein 521	2	2	0.0316117	0.88929	1	0.152885	0.041167	0	0.609157	0.00637507	0
ENSG00000198888	4535	MT-ND1	mitochondrially encoded NADH:ubiquinone oxidoreductase core subunit 1	2	2	0.0681133	1.87582	1	0.210953	0.334845	0	0.126107	-1.09374	0
ENSG00000198920	9851	KIAA0753	KIAA0753	2	2	0.0043705	0.594526	1	0.0668192	0.30403	0	0.171606	0.101881	0
ENSG00000199135	406893	MIR101-1	microRNA 101-1	2	2	0.0929495	1.58448	1	0.758969	0.164289	0	0.451922	-0.4797	0
ENSG00000199177	407035	MIR31	microRNA 31	2	2	0.0686891	1.71484	1	0.187237	1.13422	0	0.431733	0.466584	0
ENSG00000200156	26832	RNU5B-1	RNA, U5B small nuclear 1	2	2	0.0864051	1.72503	1	0.181262	1.59674	0	0.125173	-1.29025	0
ENSG00000200169	26830	RNU5D-1	RNA, U5D small nuclear 1	2	2	0.0925108	1.0493	1	0.192954	1.02141	0	0.134634	-0.827213	0
ENSG00000200397	0	Y_RNA	NA	2	2	0.0415558	1.21505	1	0.405496	0.461385	0	0.207967	-0.787343	0
ENSG00000200792	677846	SNORA80A	small nucleolar RNA, H/ACA box 80A	2	2	0.077909	0.62565	1	0.663487	0.29573	0	0.560794	-0.285101	0
ENSG00000200972	100873838	RNU5A-8P	RNA, U5A small nuclear 8, pseudogene	2	2	0.0847726	0.924244	1	0.185142	1.2543	0	0.172419	-0.503286	0
ENSG00000201098	6084	RNY1	RNA, Ro60-associated Y1	2	2	0.0623571	1.14232	1	0.143537	1.29902	0	0.752503	-0.090593	0
ENSG00000201208	0	Y_RNA	NA	2	2	0.0613867	1.02973	1	0.661853	0.215255	0	0.131362	-0.893238	0
ENSG00000201772	677796	SNORA5C	small nucleolar RNA, H/ACA box 5C	2	2	0.0801193	1.07428	1	0.292372	0.379572	0	0.967114	0.00745225	0
ENSG00000203286	0	Metazoa_SRP	NA	2	2	0.087928	0.710692	1	0.0430095	0.394634	0	0.505888	0.0595266	0
ENSG00000203880	55251	PCMTD2	protein-L-isoaspartate (D-aspartate) O-methyltransferase domain containing 2	2	2	0.00719813	0.892539	1	0.0322152	0.515138	0	0.0487572	-0.149753	0
ENSG00000204308	6048	RNF5	ring finger protein 5	2	2	0.0161491	0.893385	1	0.104369	0.256017	0	0.142955	-0.170821	0
ENSG00000204463	7917	BAG6	BCL2 associated athanogene 6	2	2	0.0652652	0.707343	1	0.0910912	0.426555	0	0.481189	-0.138044	0
ENSG00000204599	56658	TRIM39	tripartite motif containing 39	2	2	0.0417528	0.619048	1	0.0614594	0.414662	0	0.339356	0.0819854	0
ENSG00000204673	84335	AKT1S1	AKT1 substrate 1	2	2	0.0144647	0.955906	1	0.00017343	0.454741	0	0.0351556	-0.459599	0
ENSG00000204681	2550	GABBR1	gamma-aminobutyric acid type B receptor subunit 1	2	2	0.0151547	0.814267	1	0.0192262	0.543991	0	0.0685062	0.21323	0
ENSG00000204859	3104	ZBTB48	zinc finger and BTB domain containing 48	2	2	0.0350159	0.828598	1	0.0767888	0.394337	0	0.0079439	-0.463088	0
ENSG00000205084	79583	TMEM231	transmembrane protein 231	2	2	0.010939	0.699474	1	0.068894	0.335118	0	0.033765	-0.384502	0
ENSG00000206573	440944	THUMPD3-AS1	THUMPD3 antisense RNA 1	2	2	0.0849351	0.616559	1	0.0609225	0.279991	0	0.203295	-0.131665	0
ENSG00000206737	26863	RNVU1-18	RNA, variant U1 small nuclear 18	2	2	0.0741161	1.62667	1	0.106922	1.35574	0	0.125775	-1.0077	0
ENSG00000206838	654319	SNORA5A	small nucleolar RNA, H/ACA box 5A	2	2	0.0963977	1.03069	1	0.908647	0.0406381	0	0.990773	-0.00477356	0
ENSG00000206992	106479820	RNU6-574P	RNA, U6 small nuclear 574, pseudogene	2	2	0.00582728	1.60157	1	0.291897	0.515205	0	0.18322	-0.488401	0
ENSG00000207041	106478919	RNU6-3P	RNA, U6 small nuclear 3, pseudogene	2	2	0.0823867	1.2863	1	0.778683	-0.139636	0	0.179341	-0.824212	0
ENSG00000207468	641451	SNORA19	small nucleolar RNA, H/ACA box 19	2	2	0.0934811	0.776146	1	0.109645	1.08651	0	0.0823121	-0.578065	0
ENSG00000207524	100873748	RNU6-33P	RNA, U6 small nuclear 33, pseudogene	2	2	0.0138671	1.32249	1	0.675005	0.179237	0	0.121396	-0.831966	0
ENSG00000207547	407014	MIR25	microRNA 25	2	2	0.0542689	1.98123	1	0.102049	1.39553	0	0.576037	-0.214606	0
ENSG00000207550	407056	MIR99B	microRNA 99b	2	2	0.0781073	0.784376	1	0.178149	0.626929	0	0.0981348	-0.292836	0
ENSG00000207647	406944	MIR153-1	microRNA 153-1	2	2	0.00536133	2.01762	1	0.116067	1.32561	0	0.1148	0.730131	0
ENSG00000207975	406955	MIR181B1	microRNA 181b-1	2	2	0.017638	0.957194	1	0.123846	0.88022	0	0.90126	-0.0106456	0
ENSG00000208008	406910	MIR125A	microRNA 125a	2	2	0.0514007	0.957256	1	0.878705	-0.0791798	0	0.369448	-0.554258	0
ENSG00000208028	693201	MIR616	microRNA 616	2	2	0.0502802	1.55716	1	0.119033	-0.301311	0	0.100554	-0.899917	0
ENSG00000212283	692205	SNORD89	small nucleolar RNA, C/D box 89	2	2	0.0561547	1.95725	1	0.166828	1.18028	0	0.815662	0.111622	0
ENSG00000213339	81890	QTRT1	queuine tRNA-ribosyltransferase catalytic subunit 1	2	2	0.0269543	0.685584	1	0.113762	0.161945	0	0.0515829	-0.442725	0
ENSG00000213600	0	U73169.1	novel transcript, sense intronic to GNAI2	2	2	0.0310618	0.899347	1	0.582032	-0.130456	0	0.15239	-0.465586	0
ENSG00000213654	63940	GPSM3	G protein signaling modulator 3	2	2	0.0223435	0.859446	1	0.0246101	-0.456933	0	0.927507	-0.00518694	0
ENSG00000213719	1192	CLIC1	chloride intracellular channel 1	2	2	0.00856934	0.621155	1	0.0109966	0.348256	0	0.0368035	-0.0551352	0
ENSG00000214160	10195	ALG3	ALG3 alpha-1,3- mannosyltransferase	2	2	0.0345485	0.588279	1	0.0311731	0.291817	0	0.0252121	-0.453276	0
ENSG00000214331	283922	AC009053.1	pyruvate dehydrogenase phosphatase regulatory subunit (PDPR) pseudogene	2	2	0.0389672	0.77748	1	0.0120125	0.550764	0	0.0714981	-0.262312	0
ENSG00000214548	55384	MEG3	maternally expressed 3	2	2	0.0894109	0.63254	1	0.0602618	0.499558	0	0.45284	-0.074169	0
ENSG00000215375	4636	MYL5	myosin light chain 5	2	2	0.0146463	0.939232	1	0.0170621	0.499812	0	0.0744827	-0.236411	0
ENSG00000215908	84809	CROCCP2	CROCC pseudogene 2	2	2	0.0461921	0.695245	1	0.02925	0.341089	0	0.0257803	-0.372745	0
ENSG00000221184	0	AL513534.1	NA	2	2	0.0430219	0.673065	1	0.288936	0.742253	0	0.16994	-0.416474	0
ENSG00000221890	23467	NPTXR	neuronal pentraxin receptor	2	2	0.0204245	1.1713	1	0.028786	0.275572	0	0.0553663	-0.296493	0
ENSG00000221914	5520	PPP2R2A	protein phosphatase 2 regulatory subunit Balpha	2	2	0.091316	0.902001	1	0.160768	0.165752	0	0.869862	0.0318498	0
ENSG00000221988	9374	PPT2	palmitoyl-protein thioesterase 2	2	2	0.0350438	0.846679	1	0.0478619	0.405235	0	0.0553698	-0.482014	0
ENSG00000221990	116349	EXOC3-AS1	EXOC3 antisense RNA 1	2	2	0.0242032	0.663583	1	0.200814	0.428407	0	0.133632	-0.39622	0
ENSG00000222345	109616991	SNORD19C	small nucleolar RNA, C/D box 19C	2	2	0.0646777	1.41985	1	0.400163	0.552334	0	0.878646	0.0283503	0
ENSG00000225630	100652939	MTND2P28	MT-ND2 pseudogene 28	2	2	0.0824594	1.75306	1	0.139119	0.303399	0	0.158449	-0.939367	0
ENSG00000226479	79134	TMEM185B	transmembrane protein 185B	2	2	0.0137749	0.729052	1	0.128674	0.352858	0	0.113189	-0.387814	0
ENSG00000227671	0	AL390728.4	zinc finger protein pseudogene	2	2	0.0418375	0.790107	1	0.0237145	0.502797	0	0.136327	-0.217224	0
ENSG00000228393	100216546	LINC01004	long intergenic non-protein coding RNA 1004	2	2	0.0244686	0.938123	1	0.0361609	0.537239	0	0.110715	-0.213381	0
ENSG00000229539	0	PANK2-AS1	novel transcript	2	2	0.0715249	0.935097	1	0.175181	0.74493	0	0.279044	0.21967	0
ENSG00000231064	0	AC234582.1	novel transcript, antisense to THBS3	2	2	0.00491179	1.17105	1	0.699285	-0.0285632	0	0.0339395	-0.577486	0
ENSG00000231365	101929147	WARS2-AS1	WARS2 antisense RNA 1	2	2	0.00263267	0.751502	1	0.0993366	0.196077	0	0.0580432	-0.307295	0
ENSG00000231503	5761	PTMAP4	prothymosin alpha pseudogene 4	2	2	0.0583283	0.589516	1	0.217612	-0.176481	0	0.132829	0.343753	0
ENSG00000232956	285958	SNHG15	small nucleolar RNA host gene 15	2	2	0.0596803	0.581588	1	0.0397373	0.341972	0	0.00474912	0.387599	0
ENSG00000235284	26786	SNORD62A	small nucleolar RNA, C/D box 62A	2	2	0.0427251	0.841938	1	0.425906	-0.147173	0	0.645476	-0.0861739	0
ENSG00000237441	5863	RGL2	ral guanine nucleotide dissociation stimulator like 2	2	2	0.0204153	1.08921	1	0.000659668	0.577013	0	0.0782759	-0.308963	0
ENSG00000238713	0	Y_RNA	NA	2	2	0.0934949	0.595181	1	0.0898511	0.330645	0	0.208465	0.26116	0
ENSG00000238835	677765	SCARNA18	small Cajal body-specific RNA 18	2	2	0.0869374	0.745871	1	0.500746	0.420576	0	0.245078	-0.714721	0
ENSG00000239039	692084	SNORD13	small nucleolar RNA, C/D box 13	2	2	0.0450314	1.32576	1	0.88414	0.0298112	0	0.1312	-0.769144	0
ENSG00000239569	100216545	KMT2E-AS1	KMT2E antisense RNA 1	2	2	0.0361191	0.846281	1	0.0211508	0.417895	0	0.215672	-0.121507	0
ENSG00000241217	106479516	RN7SL809P	RNA, 7SL, cytoplasmic 809, pseudogene	2	2	0.0560423	0.688214	1	0.761614	0.104607	0	0.0870275	-0.424033	0
ENSG00000249471	388569	ZNF324B	zinc finger protein 324B	2	2	0.0101441	0.74676	1	0.0798857	0.414972	0	0.0738818	-0.40285	0
ENSG00000249572	0	AC034231.1	novel transcript	2	2	0.0305512	0.869186	1	0.0612717	0.505768	0	0.489576	0.0682794	0
ENSG00000251179	103752589	TMEM92-AS1	TMEM92 antisense RNA 1	2	2	0.0046422	2.05225	1	0.9941	0.000819563	0	0.319505	-0.244511	0
ENSG00000252516	100873316	RNA5SP82	RNA, 5S ribosomal pseudogene 82	2	2	0.0956265	0.938506	1	0.240374	0.814816	0	0.340637	0.32776	0
ENSG00000253106	0	AC090198.1	novel transcript, antisense to TATDN1	2	2	0.0315039	0.766147	1	0.167311	0.204266	0	0.15982	-0.271003	0
ENSG00000254855	0	AP001107.8	novel transcript	2	2	0.0847592	0.676777	1	0.668761	-0.100069	0	0.122338	0.354306	0
ENSG00000255031	0	AP002807.1	novel transcript, antisense to CHKA	2	2	0.0522754	0.648433	1	0.162265	-0.168343	0	0.19848	-0.124625	0
ENSG00000256235	85027	SMIM3	small integral membrane protein 3	2	2	0.0193716	0.723172	1	0.186989	-0.0492782	0	0.359281	-0.0445477	0
ENSG00000256594	374443	AC010186.2	C-type lectin domain family 2 (CLEC2) pseudogene	2	2	0.004009	1.18048	1	0.0771427	0.554577	0	0.0331528	-0.245723	0
ENSG00000256894	0	AC022509.3	novel transcript, antisense to SSPN	2	2	0.013759	0.977395	1	0.147598	-0.320336	0	0.0951609	-0.188142	0
ENSG00000257727	10330	CNPY2	canopy FGF signaling regulator 2	2	2	0.0830312	0.592333	1	0.0167643	0.450268	0	0.111172	-0.225302	0
ENSG00000260136	0	AC008915.3	novel transcript	2	2	0.0941011	0.66697	1	0.0479855	0.255762	0	0.114475	-0.354456	0
ENSG00000260563	0	AC132872.1	novel transcript	2	2	0.0353059	0.610729	1	0.0912341	0.390703	0	0.659582	0.0325604	0
ENSG00000260751	0	AC008870.2	novel transcript	2	2	0.0821473	0.816728	1	0.063406	0.360388	0	0.105371	-0.423124	0
ENSG00000260911	0	AC135050.3	novel transcript	2	2	0.0755342	0.884729	1	0.0386946	0.529987	0	0.401175	0.118293	0
ENSG00000261270	0	AC012181.2	novel transcript, sense intronic to HERPUD1	2	2	0.0155148	0.792157	1	0.328678	-0.286966	0	0.323314	-0.284925	0
ENSG00000261324	0	AC010168.2	novel transcript, overlapping HIST4H4	2	2	0.00783469	0.935827	1	0.0312493	0.510108	0	0.137084	0.148084	0
ENSG00000261349	0	AL031432.2	novel pseudogene	2	2	0.0906094	0.593887	1	0.105261	0.233485	0	0.0865277	0.263612	0
ENSG00000261512	0	AC092368.3	novel transcript	2	2	0.0853705	0.712882	1	0.0470337	0.521718	0	0.177933	-0.26297	0
ENSG00000262413	0	AC145207.2	novel transcript, antisense ARHGDIA	2	2	0.0434277	0.776492	1	0.146029	0.415791	0	0.0880445	-0.423291	0
ENSG00000262877	0	AC110285.2	novel transcript	2	2	0.0443114	0.723014	1	0.620339	0.0529312	0	0.0909831	-0.444059	0
ENSG00000265134	100422899	MIR3190	microRNA 3190	2	2	0.0705891	1.34394	1	0.717597	-0.068637	0	0.478146	-0.193921	0
ENSG00000265355	100422859	MIR3136	microRNA 3136	2	2	0.0881498	1.28624	1	0.113944	0.866574	0	0.123339	0.470027	0
ENSG00000265806	100422860	MIR4292	microRNA 4292	2	2	0.0803363	0.742442	1	0.212866	0.729767	0	0.108482	-0.489998	0
ENSG00000265982	0	AC103810.3	Rho GTPase-activating protein 27-like protein pseudogene	2	2	0.029427	1.9945	1	0.143893	1.24234	0	0.0154086	-0.501849	0
ENSG00000265996	100500854	MIR3671	microRNA 3671	2	2	0.0864817	1.41697	1	0.14503	1.31186	0	0.830733	0.10292	0
ENSG00000267080	339201	ASB16-AS1	ASB16 antisense RNA 1	2	2	0.0219248	0.604425	1	0.0656168	0.520547	0	0.0506487	-0.575363	0
ENSG00000267595	0	AC060780.3	breast cancer 1, early onset (BRCA1) pseudogene	2	2	0.029515	1.26672	1	0.212592	0.358815	0	0.899796	-0.0191655	0
ENSG00000267838	0	AC245884.8	novel transcript	2	2	0.00974612	0.85448	1	0.569389	0.0381886	0	0.0878848	-0.228169	0
ENSG00000268403	644656	AC132192.2	novel transcript, antisense to ZNF143	2	2	0.0249012	0.595433	1	0.125471	0.272595	0	0.0742541	-0.374997	0
ENSG00000268743	0	AC008737.1	novel transcript, sense intronic SIN3B	2	2	0.0306995	0.65131	1	0.387583	-0.268949	0	0.604657	0.104845	0
ENSG00000271780	0	AL118558.3	novel transcript	2	2	0.00030187	0.662846	1	0.200419	0.25507	0	0.0883811	-0.201607	0
ENSG00000271886	407054	MIR98	microRNA 98	2	2	0.0676711	1.23164	1	0.340342	0.450892	0	0.814236	-0.0906806	0
ENSG00000272106	0	AL691432.2	artifact	2	2	0.0245415	0.740668	1	0.0471551	0.503638	0	0.218126	0.114198	0
ENSG00000272468	0	AL021807.1	novel transcript	2	2	0.0457195	1.42031	1	0.670477	-0.102087	0	0.389529	0.249981	0
ENSG00000272606	0	AC015982.2	novel transcript	2	2	0.0719845	0.741573	1	0.307805	0.281521	0	0.56004	0.126767	0
ENSG00000272667	0	AC012306.2	novel transcript	2	2	0.0754215	0.617919	1	0.0166851	0.26586	0	0.0992913	-0.145838	0
ENSG00000272787	0	AC253536.6	novel transcript	2	2	0.037633	1.09321	1	0.103077	0.524217	0	0.116677	-0.215006	0
ENSG00000273139	0	AC007663.3	novel transcript	2	2	0.0261224	0.617025	1	0.475865	0.142667	0	0.135239	-0.328958	0
ENSG00000273257	0	AC069200.1	novel transcript	2	2	0.0891283	1.00738	1	0.262903	-0.19784	0	0.167879	0.540078	0
ENSG00000273343	0	AC007663.4	novel transcript, sense intronic to DGCR6L	2	2	0.0489529	0.778955	1	0.0846112	0.341447	0	0.0582154	-0.475574	0
ENSG00000273802	8339	H2BC8	H2B clustered histone 8	2	2	0.0768297	0.664978	1	0.0650341	-0.570225	0	0.0311459	-0.368022	0
ENSG00000273820	389856	USP27X	ubiquitin specific peptidase 27 X-linked	2	2	0.0446103	0.599061	1	0.237633	0.146337	0	0.348178	-0.133467	0
ENSG00000274213	0	AC015912.3	novel transcript	2	2	0.0662445	0.978924	1	0.800753	-0.0242596	0	0.0751341	-0.408428	0
ENSG00000275084	692208	SNORD91B	small nucleolar RNA, C/D box 91B	2	2	0.0747068	0.729169	1	0.0197011	0.390038	0	0.322695	0.17298	0
ENSG00000275183	94059	LENG9	leukocyte receptor cluster member 9	2	2	0.0233668	1.40865	1	0.017151	0.546622	0	0.0948229	-0.281638	0
ENSG00000275342	157285	PRAG1	PEAK1 related, kinase-activating pseudokinase 1	2	2	0.0535595	0.74495	1	0.0316805	0.553317	0	0.487509	0.100526	0
ENSG00000275373	102466906	MIR6124	microRNA 6124	2	2	0.0665205	1.3711	1	0.478093	0.740737	0	0.684791	0.127764	0
ENSG00000276712	102465668	MIR7111	microRNA 7111	2	2	0.00903881	1.08887	1	0.450659	0.474569	0	0.751123	-0.0470836	0
ENSG00000277203	8263	F8A1	coagulation factor VIII associated 1	2	2	0.0403207	0.84321	1	0.0936136	0.385123	0	0.995802	0.000191726	0
ENSG00000277387	102465863	MIR8058	microRNA 8058	2	2	0.0364764	0.967213	1	0.148199	0.861423	0	0.128909	0.403397	0
ENSG00000277391	102465530	MIR6881	microRNA 6881	2	2	0.0682355	2.06366	1	0.165039	1.31341	0	0.359988	-0.408426	0
ENSG00000277450	0	AC002094.4	novel transcript, sense intronic to transcript readthrough between TMEM199 and SARM1	2	2	0.044166	0.810229	1	0.373086	0.329785	0	0.849462	-0.0158001	0
ENSG00000277759	102465974	MIR6719	microRNA 6719	2	2	0.0174245	0.640486	1	0.837278	-0.117296	0	0.836545	-0.11781	0
ENSG00000278133	0	AC135050.6	novel transcript, sense intronic to KAT8	2	2	0.0750183	0.628134	1	0.878705	0.0201679	0	0.18303	-0.339647	0
ENSG00000278864	0	AC055811.4	novel transcript	2	2	0.0112932	0.799537	1	0.23838	0.284192	0	0.00858557	-0.276633	0
ENSG00000279207	0	AC015813.6	novel transcript	2	2	0.0177045	0.985536	1	0.0289481	0.324734	0	0.0643569	-0.274221	0
ENSG00000279744	0	AC132938.6	TEC	2	2	0.0128206	0.903557	1	0.0143394	0.430611	0	0.0853416	0.193246	0
ENSG00000279759	0	AC118344.2	TEC	2	2	0.0279282	0.610556	1	0.0582382	0.465558	0	0.125034	-0.16832	0
ENSG00000280077	0	AL353763.2	TEC	2	2	0.0286576	0.621189	1	0.440286	0.0491714	0	0.0305323	-0.497437	0
ENSG00000280121	0	AC010335.3	TEC	2	2	0.0171288	1.07266	1	0.170029	0.147274	0	0.131914	-0.22934	0
ENSG00000280206	0	AC026401.3	novel transcript	2	2	0.0178733	1.12128	1	0.139812	0.272941	0	0.0234742	-0.526762	0
ENSG00000281468	0	AC006504.7	novel transcript, sense intronic to novel transcript	2	2	0.0221854	0.774343	1	0.0631692	0.297079	0	0.161932	-0.0429705	0
ENSG00000283160	100616406	MIR4521	#N/A	2	2	0.0514185	1.14989	1	0.571825	0.352052	0	0.188034	-1.07412	0
ENSG00000285796	0	AL162458.1	#N/A	2	2	0.0556787	0.746886	1	0.0307283	0.44278	0	0.082591	-0.243984	0
ENSG00000004799	5166	PDK4	pyruvate dehydrogenase kinase 4	2	3	0.00463956	4.11708	1	0.0792061	-0.529823	0	0.00260586	-4.32605	-1
ENSG00000005206	56928	SPPL2B	signal peptide peptidase like 2B	2	3	0.0406888	0.660418	1	0.0879804	0.415496	0	0.0440536	-0.622276	-1
ENSG00000005249	5577	PRKAR2B	protein kinase cAMP-dependent type II regulatory subunit beta	2	3	0.00791055	1.37224	1	0.647705	0.0268119	0	0.0049446	-2.10165	-1
ENSG00000005884	3675	ITGA3	integrin subunit alpha 3	2	3	0.0133028	0.65984	1	0.107567	0.322443	0	0.0113679	-1.23217	-1
ENSG00000007541	9091	PIGQ	phosphatidylinositol glycan anchor biosynthesis class Q	2	3	0.00122742	0.905519	1	0.0149284	0.460873	0	0.00368843	-0.835467	-1
ENSG00000010361	80199	FUZ	fuzzy planar cell polarity protein	2	3	0.0248571	1.04188	1	0.035154	-0.301043	0	0.0197872	-1.04754	-1
ENSG00000028116	7444	VRK2	VRK serine/threonine kinase 2	2	3	0.0063668	1.53476	1	0.150663	0.139912	0	0.0130962	-1.3168	-1
ENSG00000035687	159	ADSS2	adenylosuccinate synthase 2	2	3	0.016335	1.74583	1	0.022889	0.515301	0	0.0258417	-1.1751	-1
ENSG00000047644	55841	WWC3	WWC family member 3	2	3	0.0238938	0.64137	1	0.943426	-0.00471836	0	0.0146911	-1.51768	-1
ENSG00000048392	50484	RRM2B	ribonucleotide reductase regulatory TP53 inducible subunit M2B	2	3	0.0113624	0.753665	1	0.19342	0.0621916	0	0.00797212	-1.25807	-1
ENSG00000052802	6307	MSMO1	methylsterol monooxygenase 1	2	3	0.0398756	0.751322	1	0.024732	-0.484002	0	0.0143116	-1.58668	-1
ENSG00000056558	7185	TRAF1	TNF receptor associated factor 1	2	3	0.0189412	1.46962	1	0.019672	-0.548247	0	0.00585498	-2.27541	-1
ENSG00000056972	10758	TRAF3IP2	TRAF3 interacting protein 2	2	3	0.00880275	1.29579	1	0.0254176	-0.436354	0	0.00787138	-1.34795	-1
ENSG00000064199	53340	SPA17	sperm autoantigenic protein 17	2	3	0.0170785	0.789313	1	0.0686163	0.256778	0	0.0170561	-0.811886	-1
ENSG00000064651	6558	SLC12A2	solute carrier family 12 member 2	2	3	0.00144231	1.65389	1	0.0969834	0.179093	0	0.0171976	-0.675065	-1
ENSG00000064932	22904	SBNO2	strawberry notch homolog 2	2	3	0.0172756	0.971267	1	0.0921406	0.209006	0	0.0311184	-0.751834	-1
ENSG00000071553	537	ATP6AP1	ATPase H+ transporting accessory protein 1	2	3	0.0292812	0.972	1	0.415268	0.147507	0	0.0682191	-0.800386	-1
ENSG00000072736	4775	NFATC3	nuclear factor of activated T cells 3	2	3	0.00366337	0.899602	1	0.0269391	-0.142077	0	0.000811574	-0.778549	-1
ENSG00000072778	37	ACADVL	acyl-CoA dehydrogenase very long chain	2	3	0.0116441	1.59252	1	0.198956	-0.0647904	0	0.00982357	-0.963892	-1
ENSG00000072864	54820	NDE1	nudE neurodevelopment protein 1	2	3	0.0175007	0.982729	1	0.0588192	0.194165	0	0.0187705	-0.666059	-1
ENSG00000075151	8672	EIF4G3	eukaryotic translation initiation factor 4 gamma 3	2	3	0.0504451	0.689161	1	0.121269	0.368715	0	0.0379806	-1.1564	-1
ENSG00000075651	5337	PLD1	phospholipase D1	2	3	0.0536831	0.623474	1	0.00720483	-0.532152	0	0.0104659	-1.31862	-1
ENSG00000076108	11176	BAZ2A	bromodomain adjacent to zinc finger domain 2A	2	3	0.0199963	0.848563	1	0.688231	0.0299304	0	0.0264474	-0.68504	-1
ENSG00000077454	4034	LRCH4	leucine rich repeats and calponin homology domain containing 4	2	3	0.0339621	0.728651	1	0.0361528	0.56508	0	0.0330505	-0.660346	-1
ENSG00000082269	57579	FAM135A	family with sequence similarity 135 member A	2	3	0.043834	0.642272	1	0.0741332	-0.228218	0	0.0176417	-0.779713	-1
ENSG00000085662	231	AKR1B1	aldo-keto reductase family 1 member B	2	3	0.0127812	0.721865	1	0.128864	0.167614	0	0.00359827	-2.52302	-1
ENSG00000086619	56605	ERO1B	endoplasmic reticulum oxidoreductase 1 beta	2	3	0.0186745	1.09604	1	0.0666201	-0.191114	0	0.00993596	-1.24422	-1
ENSG00000086712	55787	TXLNG	taxilin gamma	2	3	0.00626394	0.715561	1	0.640977	-0.0346929	0	0.00182604	-0.680354	-1
ENSG00000087338	64395	GMCL1	germ cell-less 1, spermatogenesis associated	2	3	0.0188218	0.86434	1	0.108402	-0.0712233	0	0.0260302	-0.667518	-1
ENSG00000089057	9962	SLC23A2	solute carrier family 23 member 2	2	3	0.0077687	1.19475	1	0.0905434	-0.24005	0	0.00261468	-2.13663	-1
ENSG00000089505	113540	CMTM1	CKLF like MARVEL transmembrane domain containing 1	2	3	0.0133412	1.26906	1	0.572858	0.116934	0	0.0206655	-0.785258	-1
ENSG00000090971	57106	NAT14	N-acetyltransferase 14 (putative)	2	3	0.0427569	0.605055	1	0.0556321	0.347904	0	0.0278802	-0.830282	-1
ENSG00000091039	114882	OSBPL8	oxysterol binding protein like 8	2	3	0.0113167	1.05868	1	0.023268	0.194352	0	0.0147382	-0.818977	-1
ENSG00000099381	9739	SETD1A	SET domain containing 1A, histone lysine methyltransferase	2	3	0.0879959	0.645202	1	0.120224	0.410813	0	0.0960954	-0.734775	-1
ENSG00000100284	10043	TOM1	target of myb1 membrane trafficking protein	2	3	0.0127892	1.17157	1	0.052379	0.301272	0	0.00764573	-0.702807	-1
ENSG00000100311	5155	PDGFB	platelet derived growth factor subunit B	2	3	0.00753476	2.63051	1	0.0914954	-0.370237	0	0.00949876	-1.80542	-1
ENSG00000100360	11020	IFT27	intraflagellar transport 27	2	3	0.0544984	0.666886	1	0.0626069	0.422919	0	0.0194067	-0.914357	-1
ENSG00000100461	55147	RBM23	RNA binding motif protein 23	2	3	0.00856334	0.723803	1	0.07047	0.310595	0	0.00261697	-0.897511	-1
ENSG00000100503	51199	NIN	ninein	2	3	0.0101367	1.07645	1	0.0255088	0.367491	0	0.00763267	-1.19236	-1
ENSG00000100836	8106	PABPN1	poly(A) binding protein nuclear 1	2	3	0.0761385	0.67725	1	0.110349	0.347584	0	0.0625492	-0.637866	-1
ENSG00000100906	4792	NFKBIA	NFKB inhibitor alpha	2	3	0.0058091	1.69299	1	0.0290026	0.558214	0	0.0079476	-1.20804	-1
ENSG00000101665	4092	SMAD7	SMAD family member 7	2	3	0.0114051	1.8951	1	0.256639	-0.0435767	0	0.00429146	-0.71985	-1
ENSG00000101825	25878	MXRA5	matrix remodeling associated 5	2	3	0.013801	2.05913	1	0.121206	-0.350922	0	0.0254776	-0.749281	-1
ENSG00000103064	9057	SLC7A6	solute carrier family 7 member 6	2	3	0.00214697	0.714057	1	0.0568013	0.230658	0	0.00456987	-1.30832	-1
ENSG00000103549	9810	RNF40	ring finger protein 40	2	3	0.0013211	0.81592	1	0.00736697	0.456527	0	0.00476041	-0.621326	-1
ENSG00000104081	90427	BMF	Bcl2 modifying factor	2	3	0.000536697	2.65197	1	0.0626013	0.274292	0	0.00417043	-1.83099	-1
ENSG00000104361	79815	NIPAL2	NIPA like domain containing 2	2	3	0.0199171	0.595622	1	0.418505	-0.085949	0	0.0304086	-0.610368	-1
ENSG00000104635	23516	SLC39A14	solute carrier family 39 member 14	2	3	0.00200371	2.04965	1	0.0485069	0.351555	0	0.00402294	-2.04098	-1
ENSG00000104660	23484	LEPROTL1	leptin receptor overlapping transcript like 1	2	3	0.0168973	0.65037	1	0.00514855	0.275542	0	0.00263938	-0.867047	-1
ENSG00000104825	4793	NFKBIB	NFKB inhibitor beta	2	3	0.0315183	0.884072	1	0.115409	0.199129	0	0.0205028	-1.23629	-1
ENSG00000104856	5971	RELB	RELB proto-oncogene, NF-kB subunit	2	3	0.0240642	0.977935	1	0.0648874	0.229562	0	0.0166277	-0.726571	-1
ENSG00000105499	8605	PLA2G4C	phospholipase A2 group IVC	2	3	0.00552276	0.787676	1	0.522456	0.0550182	0	0.0156613	-1.14792	-1
ENSG00000105643	27106	ARRDC2	arrestin domain containing 2	2	3	0.00398888	1.86066	1	0.0541434	0.0878337	0	0.00131987	-0.786769	-1
ENSG00000105655	51477	ISYNA1	inositol-3-phosphate synthase 1	2	3	0.0172179	0.721651	1	0.57766	-0.0402689	0	0.0275044	-0.621984	-1
ENSG00000105767	199731	CADM4	cell adhesion molecule 4	2	3	0.0111201	1.35682	1	0.0147743	-0.40371	0	0.0106925	-1.40783	-1
ENSG00000105854	5445	PON2	paraoxonase 2	2	3	0.000394319	0.630866	1	0.250761	-0.0767219	0	0.000213126	-1.54781	-1
ENSG00000106346	84132	USP42	ubiquitin specific peptidase 42	2	3	0.0423788	0.620614	1	0.0723024	0.314462	0	0.0341972	-0.64371	-1
ENSG00000106546	196	AHR	aryl hydrocarbon receptor	2	3	0.0133936	1.4993	1	0.00487862	-0.529362	0	0.00926288	-1.6738	-1
ENSG00000106571	2737	GLI3	GLI family zinc finger 3	2	3	0.0302851	0.939529	1	0.0471281	0.402889	0	0.0116431	-1.17267	-1
ENSG00000106993	55664	CDC37L1	cell division cycle 37 like 1	2	3	0.00859174	0.992112	1	0.0623172	0.232048	0	0.00237174	-1.38328	-1
ENSG00000108106	27338	UBE2S	ubiquitin conjugating enzyme E2 S	2	3	0.0406004	0.638561	1	0.064847	-0.240471	0	0.0325295	-0.732647	-1
ENSG00000108179	10105	PPIF	peptidylprolyl isomerase F	2	3	0.011579	1.5489	1	0.0326277	0.481689	0	0.00783504	-1.37382	-1
ENSG00000108511	3216	HOXB6	homeobox B6	2	3	0.0564153	0.655524	1	0.036859	-0.318749	0	0.00625053	-1.23576	-1
ENSG00000108528	8402	SLC25A11	solute carrier family 25 member 11	2	3	0.0182763	0.766107	1	0.0253156	0.487971	0	0.0151845	-1.03953	-1
ENSG00000108773	2648	KAT2A	lysine acetyltransferase 2A	2	3	0.0599868	0.62585	1	0.152312	0.109244	0	0.0154194	-0.782053	-1
ENSG00000108819	84687	PPP1R9B	protein phosphatase 1 regulatory subunit 9B	2	3	0.00474453	0.653769	1	0.0815349	0.313904	0	0.0171814	-1.01073	-1
ENSG00000109320	4790	NFKB1	nuclear factor kappa B subunit 1	2	3	0.000104975	1.10445	1	0.133456	0.279498	0	0.0187934	-1.37588	-1
ENSG00000110717	4728	NDUFS8	NADH:ubiquinone oxidoreductase core subunit S8	2	3	0.00765526	0.828938	1	0.0499047	0.37032	0	0.000798871	-1.70531	-1
ENSG00000110719	10312	TCIRG1	T cell immune regulator 1, ATPase H+ transporting V0 subunit a3	2	3	0.0272068	1.14327	1	0.0553365	0.435833	0	0.0216233	-0.982267	-1
ENSG00000110911	4891	SLC11A2	solute carrier family 11 member 2	2	3	0.0155284	0.745667	1	0.193421	-0.0549409	0	0.00460004	-1.67343	-1
ENSG00000111885	4121	MAN1A1	mannosidase alpha class 1A member 1	2	3	0.015596	0.878367	1	0.041006	0.172463	0	0.00580787	-1.4828	-1
ENSG00000112033	5467	PPARD	peroxisome proliferator activated receptor delta	2	3	0.0156798	1.01632	1	0.0113915	0.415195	0	0.0142091	-1.15116	-1
ENSG00000112343	10475	TRIM38	tripartite motif containing 38	2	3	0.0130416	0.872151	1	0.0535621	0.393819	0	0.0186595	-0.674909	-1
ENSG00000112983	10902	BRD8	bromodomain containing 8	2	3	0.000244531	1.02953	1	0.170472	-0.0953044	0	0.0024873	-0.682234	-1
ENSG00000113070	1839	HBEGF	heparin binding EGF like growth factor	2	3	0.00309845	1.80165	1	0.0604688	-0.218245	0	0.000802047	-2.53665	-1
ENSG00000114251	7474	WNT5A	Wnt family member 5A	2	3	0.00355875	0.786028	1	0.0245314	-0.146737	0	0.000868384	-1.51096	-1
ENSG00000114383	11334	TUSC2	tumor suppressor 2, mitochondrial calcium regulator	2	3	0.00127452	0.742661	1	0.0674104	0.12374	0	0.00152594	-1.0806	-1
ENSG00000114770	10057	ABCC5	ATP binding cassette subfamily C member 5	2	3	0.00849718	1.34469	1	0.0320021	0.465434	0	0.012189	-1.42718	-1
ENSG00000114796	54800	KLHL24	kelch like family member 24	2	3	0.0172719	1.34776	1	0.042473	-0.126335	0	0.0262359	-0.640952	-1
ENSG00000115306	6711	SPTBN1	spectrin beta, non-erythrocytic 1	2	3	0.0226572	1.03845	1	0.0667567	-0.311787	0	0.0238959	-0.690998	-1
ENSG00000115317	27429	HTRA2	HtrA serine peptidase 2	2	3	0.0172489	0.908083	1	0.0444229	0.395828	0	0.0229261	-0.660861	-1
ENSG00000115594	3554	IL1R1	interleukin 1 receptor type 1	2	3	0.0134418	0.692684	1	0.211131	-0.116651	0	0.00412597	-2.60582	-1
ENSG00000116017	1820	ARID3A	AT-rich interaction domain 3A	2	3	0.00681334	0.784167	1	0.0990124	0.192047	0	0.00839838	-1.04447	-1
ENSG00000116096	6697	SPR	sepiapterin reductase	2	3	0.0123597	0.688789	1	0.618766	0.0768063	0	0.0115095	-1.84551	-1
ENSG00000116521	10067	SCAMP3	secretory carrier membrane protein 3	2	3	0.0192696	1.00337	1	0.0666189	0.3891	0	0.0145845	-1.26661	-1
ENSG00000116761	1491	CTH	cystathionine gamma-lyase	2	3	0.00419936	1.6239	1	0.348315	-0.0911159	0	0.00640067	-1.2296	-1
ENSG00000116885	127700	OSCP1	organic solute carrier partner 1	2	3	0.0563901	0.643683	1	0.775893	0.0157515	0	0.0684143	-0.589787	-1
ENSG00000117676	6195	RPS6KA1	ribosomal protein S6 kinase A1	2	3	0.012671	1.63256	1	0.0350767	0.506711	0	0.00153246	-1.32398	-1
ENSG00000117862	51060	TXNDC12	thioredoxin domain containing 12	2	3	0.0291141	0.722647	1	0.102796	-0.27229	0	0.0259906	-0.793071	-1
ENSG00000117984	1509	CTSD	cathepsin D	2	3	0.00619195	0.910739	1	0.0544058	-0.183511	0	0.00333821	-1.49499	-1
ENSG00000118454	81573	ANKRD13C	ankyrin repeat domain 13C	2	3	0.0298387	0.697371	1	0.276968	0.111231	0	0.0342964	-0.808585	-1
ENSG00000119844	54812	AFTPH	aftiphilin	2	3	0.007982	0.679993	1	0.106505	-0.22824	0	0.0298077	-0.683147	-1
ENSG00000119927	57678	GPAM	glycerol-3-phosphate acyltransferase, mitochondrial	2	3	5.87509e-05	1.81099	1	0.0411976	-0.372983	0	0.00311221	-2.42612	-1
ENSG00000120802	7112	TMPO	thymopoietin	2	3	0.00839979	1.63481	1	0.0191486	-0.423118	0	0.0071819	-2.00995	-1
ENSG00000120889	8795	TNFRSF10B	TNF receptor superfamily member 10b	2	3	0.00163338	1.10158	1	0.192585	-0.0556206	0	0.00576623	-1.0641	-1
ENSG00000123104	3709	ITPR2	inositol 1,4,5-trisphosphate receptor type 2	2	3	0.0158472	1.18596	1	0.0478389	0.417968	0	0.0286203	-0.687496	-1
ENSG00000123136	10212	DDX39A	DExD-box helicase 39A	2	3	0.0225854	0.879246	1	0.0389047	0.465137	0	0.00367819	-0.696293	-1
ENSG00000123358	3164	NR4A1	nuclear receptor subfamily 4 group A member 1	2	3	0.0205235	1.00505	1	0.0158774	-0.473942	0	0.00941725	-1.41251	-1
ENSG00000124313	23096	IQSEC2	IQ motif and Sec7 domain ArfGEF 2	2	3	0.0132096	0.758857	1	0.16914	-0.156563	0	0.0131535	-1.25461	-1
ENSG00000124549	54718	BTN2A3P	butyrophilin subfamily 2 member A3, pseudogene	2	3	0.0415736	0.772554	1	0.0758897	0.23728	0	0.0399974	-0.592211	-1
ENSG00000125347	3659	IRF1	interferon regulatory factor 1	2	3	0.0091789	1.32897	1	0.0512161	-0.532915	0	0.00782128	-1.98291	-1
ENSG00000125457	57409	MIF4GD	MIF4G domain containing	2	3	0.0268446	1.26078	1	0.0318641	0.374024	0	0.0190743	-1.19551	-1
ENSG00000126785	57381	RHOJ	ras homolog family member J	2	3	0.0178645	0.865077	1	0.134783	-0.264709	0	0.0273209	-0.736494	-1
ENSG00000127838	25953	PNKD	PNKD metallo-beta-lactamase domain containing	2	3	0.00892925	0.736271	1	0.140175	0.151788	0	0.0117336	-1.24762	-1
ENSG00000128590	4189	DNAJB9	DnaJ heat shock protein family (Hsp40) member B9	2	3	0.01271	1.31252	1	0.930683	0.00135147	0	0.0237399	-0.82216	-1
ENSG00000129071	8930	MBD4	methyl-CpG binding domain 4, DNA glycosylase	2	3	0.00282198	0.74416	1	0.131811	0.254901	0	0.00474488	-0.823659	-1
ENSG00000129245	9513	FXR2	FMR1 autosomal homolog 2	2	3	0.01278	0.664731	1	0.0179488	0.567821	0	0.0137639	-0.584312	-1
ENSG00000129347	65095	KRI1	KRI1 homolog	2	3	0.0297392	1.33446	1	0.0165289	0.416007	0	0.00603546	-0.853304	-1
ENSG00000129566	7011	TEP1	telomerase associated protein 1	2	3	0.0372101	0.731497	1	0.13116	0.177263	0	0.0218222	-0.727536	-1
ENSG00000129932	83475	DOHH	deoxyhypusine hydroxylase	2	3	0.0299813	0.747574	1	0.0601152	0.429204	0	0.0422927	-0.665913	-1
ENSG00000130309	79709	COLGALT1	collagen beta(1-O)galactosyltransferase 1	2	3	0.00367043	0.702257	1	0.0632152	-0.305749	0	0.006262	-1.01329	-1
ENSG00000130517	54858	PGPEP1	pyroglutamyl-peptidase I	2	3	0.00261291	0.814798	1	0.0312953	0.281169	0	0.00552946	-0.786877	-1
ENSG00000130522	3727	JUND	JunD proto-oncogene, AP-1 transcription factor subunit	2	3	0.00147971	1.29473	1	0.0248629	0.177307	0	0.00700494	-0.649784	-1
ENSG00000130590	140700	SAMD10	sterile alpha motif domain containing 10	2	3	0.0287135	1.11653	1	0.222023	0.0745259	0	0.0317999	-0.825725	-1
ENSG00000131373	26061	HACL1	2-hydroxyacyl-CoA lyase 1	2	3	0.0261784	0.805594	1	0.0755002	-0.27473	0	0.0114712	-1.20844	-1
ENSG00000131435	8572	PDLIM4	PDZ and LIM domain 4	2	3	0.00535956	1.54465	1	0.151184	-0.0582355	0	0.00211186	-1.43638	-1
ENSG00000132376	51763	INPP5K	inositol polyphosphate-5-phosphatase K	2	3	0.0103158	0.869397	1	0.0275872	-0.490328	0	0.00962262	-1.1938	-1
ENSG00000132481	91107	TRIM47	tripartite motif containing 47	2	3	0.0304278	0.823293	1	0.0356833	0.456924	0	0.0320621	-0.863359	-1
ENSG00000133247	84787	KMT5C	lysine methyltransferase 5C	2	3	0.0336891	0.887418	1	0.0866025	0.25605	0	0.0184412	-0.868751	-1
ENSG00000133872	51669	SARAF	store-operated calcium entry associated regulatory factor	2	3	0.00114432	1.36874	1	0.0923147	0.18165	0	0.00282692	-0.918767	-1
ENSG00000134086	7428	VHL	von Hippel-Lindau tumor suppressor	2	3	0.0159899	0.71676	1	0.094825	0.170267	0	0.0133118	-0.870593	-1
ENSG00000135541	54806	AHI1	Abelson helper integration site 1	2	3	0.0368333	0.908002	1	0.0426097	0.457305	0	0.0540831	-0.685715	-1
ENSG00000135587	6610	SMPD2	sphingomyelin phosphodiesterase 2	2	3	0.00592784	1.25154	1	0.103251	0.488316	0	0.0409787	-1.16129	-1
ENSG00000135899	3431	SP110	SP110 nuclear body protein	2	3	0.016217	0.964883	1	0.0178749	0.271461	0	0.0254349	-0.613825	-1
ENSG00000135919	5270	SERPINE2	serpin family E member 2	2	3	0.0309211	0.863878	1	0.599059	0.0239372	0	0.0277174	-1.0298	-1
ENSG00000136867	1318	SLC31A2	solute carrier family 31 member 2	2	3	0.00163462	1.56161	1	0.0249857	0.396076	0	0.00489749	-0.802414	-1
ENSG00000137507	2615	LRRC32	leucine rich repeat containing 32	2	3	0.00313109	3.4328	1	0.036467	0.268516	0	0.000945131	-4.46721	-1
[truncated: 5,048 more rows]
